# Supplementary material for: Genome-wide association reveals genetic variation of lint yield components under salty field conditions in cotton (Gossypium hirsutum L.)
Source: BMC Plant Biol. 2020 Jan 14;20:23. doi: 10.1186/s12870-019-2187-y (PMC6961271; doi:10.1186/s12870-019-2187-y)
Supplement: Supplementary file 5 — Additional file 5 Table S4. Phenotypic data statistics of lint percentage under four salt conditions. (XLSX 10 kb) [file 12870_2019_2187_MOESM5_ESM.xlsx]

## Sheet: Table S4
Table S4 Phenotypic data statistics of lint percentage under four salt conditions.
Environment	Max	Min	Mean	Std Dev	CV(%)
16A-1	46.8	26.75	38.29	4.09	10.69
16A-2	46.93	27.43	38.18	3.27	8.57
17A-1	49.9	28.86	40.35	3.63	9
17A-2	48.07	24.6	40.32	3.29	8.15
BLUP-A	50.02	19.31	39.29	5.67	14.42
16B-1	48.03	8.16	37.89	3.81	10.05
16B-2	47.87	7.8	37.99	3.47	9.14
17B-1	49.32	28.82	42.1	3.51	8.34
17B-2	49.09	28.08	40.39	3.31	8.2
BLUP-B	49.78	26.58	38.99	3.11	7.97
16C-1	46.08	7.47	38	4.02	10.59
16C-2	48.49	7.6	38	3.52	9.27
17C-1	47.33	28.62	39.7	3.46	8.72
17C-2	49.35	12.97	40.31	3.59	8.9
BLUP-C	50.99	18.63	39.09	4.98	12.73
16D-1	46.5	7.73	37.9	3.83	10.11
16D-2	47.56	26.66	38.18	3.37	8.81
17D-1	49.42	8.02	39.33	3.94	10.01
17D-2	48.9	15.47	39.49	5.01	12.68
BLUP-D	49.81	18.84	38.83	5.55	14.3
Note: A,B, C, and D indicated the total salt contents of the four environments with 19 g/Kg (condition A), 10 g/Kg (condition B), 7 g/Kg (condition C), and 5 g/Kg (condition D),respectively. 16, 17 indicated the phenotypic data from 2016 and 2017, respectively. BLUP value was evaluated in the same salt environment.
