# Supplementary material for: Genome-wide association reveals genetic variation of lint yield components under salty field conditions in cotton (Gossypium hirsutum L.)
Source: BMC Plant Biol. 2020 Jan 14;20:23. doi: 10.1186/s12870-019-2187-y (PMC6961271; doi:10.1186/s12870-019-2187-y)
Supplement: Supplementary file 8 — Additional file 8 Table S6. QTNs and QTLs of single boll weight, lint percentage and boll number per plant detected by multi-loci MLM model. (XLSX 151 kb) [file 12870_2019_2187_MOESM8_ESM.xlsx]

## Sheet: Table S6
Table S6 QTNs and QTLs of single boll weight, lint percentage and boll number per plant detected by multi-loci MLM model.
Trait name	Method	QTN	QTL	Chromosome	QTL_start	QTL_end	QTN Position (bp)	QTN effect	LOD score	-LOG10(P)	r2 (%)
SBW16-1	mrMLM	TM3453	TM3453	A01	95453376	96453376	95953376	0.3282	3.0252	3.72207	3.601
SBW16-1	mrMLM	TM9817	TM9812_TM9817_TM9821_TM9835	A04	59735276	61056214	60330350	0.3698	4.7475	5.53322	5.1049
SBW16-1	mrMLM	TM47862	TM47852_TM47858_TM47860_TM47862	D01	1327152	2532223	2032223	-0.3567	3.8247	4.5674	4.5759
SBW16-1	mrMLM	TM74748	TM74747_TM74748_TM74749_TM74751	D10	52796308	53819487	53298527	-1.1585	3.5572	4.28563	16.7808
SBW16-1	FASTmrMLM	TM9817	TM9812_TM9817_TM9821_TM9835	A04	59735276	61056214	60330350	0.3691	6.5559	7.407	5.1698
SBW16-1	FASTmrMLM	TM21814	TM21814_TM21815	A08	1016028	2065645	1516028	-0.1946	3.3342	4.05	1.3608
SBW16-1	FASTmrMLM	TM47862	TM47852_TM47858_TM47860_TM47862	D01	1327152	2532223	2032223	-0.3157	6.0271	6.861	3.646
SBW16-1	FASTmrMLM	TM63308	TM63300_TM63306_TM63308	D07	2901093	3936525	3436525	-1.0894	3.5774	4.3069	9.7238
SBW16-1	FASTmrEMMA	TM9817	TM9812_TM9817_TM9821_TM9835	A04	59735276	61056214	60330350	0.6118	4.336	5.1036	3.8366
SBW16-1	FASTmrEMMA	TM21815	TM21814_TM21815	A08	1016028	2065645	1565645	-0.4365	3.1846	3.8914	1.8783
SBW16-1	pKWmEB	TM30184	TM30184	A09	4012008	5012008	4512008	0.2283	3.123	3.826	3.64
SBW16-1	pKWmEB	TM65117	TM65117	D07	32524481	33524481	33024481	-0.3744	3.7549	4.494	5.3404
SBW16-1	pKWmEB	TM80409	TM80409_TM80410	D13	6579633	7671528	7079633	-0.325	3.8289	4.5718	3.3251
SBW16-1	ISIS EM-BLASSO	TM21815	TM21814_TM21815	A08	1016028	2065645	1565645	-0.2744	4.5958	5.375	2.9926
SBW16-1	ISIS EM-BLASSO	TM30184	TM30184	A09	4012008	5012008	4512008	0.2171	3.5557	4.284	1.8094
SBW16-1	ISIS EM-BLASSO	TM35366	TM35362_TM35365_TM35366	A10	65024917	66186233	65686233	0.3714	4.1906	4.9514	2.8153
SBW16-1	ISIS EM-BLASSO	TM43983	TM43983	A13	22898860	23898860	23398860	0.2775	4.1568	4.916	3.2113
SBW16-1	ISIS EM-BLASSO	TM71944	TM71944	D09	32299112	33299112	32799112	0.2844	5.019	5.8159	3.2416
SBW16-2	mrMLM	TM3634	TM3633_TM3634	A01	98369090	99384421	98884421	0.2754	3.7902	4.53111	6.798
SBW16-2	mrMLM	TM35366	TM35362_TM35365_TM35366	A10	65024917	66186233	65686233	0.3023	3.6637	4.39793	4.0955
SBW16-2	FASTmrMLM	TM30184	TM30184	A09	4012008	5012008	4512008	0.1527	3.1181	3.8208	1.9651
SBW16-2	FASTmrMLM	TM74764	TM74764	D10	54381447	55381447	54881447	0.5845	3.7352	4.4732	14.4488
SBW16-2	pLARmEB	TM30184	TM30184	A09	4012008	5012008	4512008	0.1493	3.3336	4.0493	1.8788
SBW16-2	pLARmEB	TM35366	TM35362_TM35365_TM35366	A10	65024917	66186233	65686233	0.215	3.7863	4.527	2.0718
SBW16-2	pLARmEB	TM43983	TM43983	A13	22898860	23898860	23398860	0.2013	5.6213	6.4411	3.711
SBW16-2	pLARmEB	TM74751	TM74747_TM74748_TM74749_TM74751	D10	52796308	53819487	53319487	-0.1715	3.2463	3.9569	2.549
SBW16-2	pKWmEB	TM3633	TM3633_TM3634	A01	98369090	99384421	98869090	0.1952	3.0015	3.6968	5.3447
SBW16-2	pKWmEB	TM38382	TM38382	A11	46576684	47576684	47076684	0.318	3.3932	4.1124	3.5646
SBW16-2	pKWmEB	TM50607	TM50585_TM50586_TM50588_TM50593_TM50607	D02	4448368	5708718	5208718	-0.1769	3.5363	4.2636	2.2713
SBW16-2	pKWmEB	TM56762	TM56762	D05	1520010	2520010	2020010	-0.161	3.353	4.0699	3.4188
SBW16-2	pKWmEB	TM77037	TM77037	D11	57869298	58869298	58369298	0.619	3.6827	4.4179	27.575
SBW16-2	ISIS EM-BLASSO	TM13700	TM13700	A06	2122801	3122801	2622801	0.3631	4.4581	5.2312	11.2792
SBW16-2	ISIS EM-BLASSO	TM21805	TM21805	A08	601420	1601420	1101420	-0.2004	3.4652	4.1885	2.1184
SBW16-2	ISIS EM-BLASSO	TM35366	TM35362_TM35365_TM35366	A10	65024917	66186233	65686233	0.2805	4.8714	5.6623	3.527
SBW16-2	ISIS EM-BLASSO	TM38382	TM38382	A11	46576684	47576684	47076684	0.3098	3.3286	4.044	1.7928
SBW16-2	ISIS EM-BLASSO	TM56762	TM56762	D05	1520010	2520010	2020010	-0.161	3.4836	4.2079	2.0676
SBW16-2	ISIS EM-BLASSO	TM74751	TM74747_TM74748_TM74749_TM74751	D10	52796308	53819487	53319487	-0.1627	3.382	4.1005	2.2949
SBW17-1	mrMLM	TM5599	TM5599_TM5616_TM5621_TM5628_TM5637	A02	79369316	80793655	79869316	0.3505	3.7957	4.5369	6.0524
SBW17-1	mrMLM	TM58958	TM58957_TM58958_TM58975	D06	790825	1989688	1313136	-0.3694	3.6638	4.39803	5.5867
SBW17-1	mrMLM	TM76394	TM76394	D11	49343460	50343460	49843460	0.2254	3.7826	4.52312	5.0294
SBW17-1	pLARmEB	TM13526	TM13514_TM13525_TM13526	A05	90941073	92118264	91618264	0.1477	3.0071	3.7028	2.1477
SBW17-1	pLARmEB	TM14156	TM14156_TM14157	A06	18141708	19252028	18641708	-0.2301	3.7959	4.5371	2.7438
SBW17-1	pLARmEB	TM40640	TM40640	A12	12388321	13388321	12888321	-0.0878	3.2185	3.9274	0.7701
SBW17-1	pKWmEB	TM14156	TM14156_TM14157	A06	18141708	19252028	18641708	-0.1997	3.0149	3.7111	4.4334
SBW17-1	pKWmEB	TM37247	TM37247	A11	6544540	7544540	7044540	-0.1365	3.0574	3.7563	3.762
SBW17-1	pKWmEB	TM42334	TM42334	A12	68112222	69112222	68612222	-0.2172	6.2618	7.1035	7.7933
SBW17-1	ISIS EM-BLASSO	TM13525	TM13514_TM13525_TM13526	A05	90941073	92118264	91612249	-0.2351	3.0193	3.7158	5.382
SBW17-1	ISIS EM-BLASSO	TM14156	TM14156_TM14157	A06	18141708	19252028	18641708	-0.2057	3.6735	4.4083	2.1924
SBW17-1	ISIS EM-BLASSO	TM36195	TM36195	A10	88803811	89803811	89303811	0.1661	3.8408	4.5843	2.0985
SBW17-1	ISIS EM-BLASSO	TM36618	TM36618	A10	95304641	96304641	95804641	-0.1205	3.4461	4.1683	1.4576
SBW17-1	ISIS EM-BLASSO	TM42334	TM42334	A12	68112222	69112222	68612222	-0.2085	4.7563	5.5424	4.1944
SBW17-1	ISIS EM-BLASSO	TM58958	TM58957_TM58958_TM58975	D06	790825	1989688	1313136	-0.2381	3.9146	4.6619	2.3572
SBW17-2	mrMLM	TM13309	TM13309	A05	86601277	87601277	87101277	-0.4261	4.4868	5.26121	20.9962
SBW17-2	FASTmrMLM	TM66274	TM66274	D07	45050063	46050063	45550063	-0.0001	3.1517	3.8565	6.5339e-07
SBW17-2	FASTmrEMMA	TM43382	TM43382	A13	4025343	5025343	4525343	-0.3459	3.2637	3.9754	2.6502
SBW17-2	pLARmEB	TM22010	TM22010	A08	4662186	5662186	5162186	-0.0005	4.1495	4.9083	3.3746e-05
SBW17-2	pLARmEB	TM31690	TM31690	A09	39607092	40607092	40107092	-0.0001	3.998	4.7495	2.4982e-06
SBW17-2	pLARmEB	TM36895	TM36895	A10	100129872	101129872	100629872	-0.2337	6.3043	7.1474	3.4456
SBW17-2	pLARmEB	TM47985	TM47985	D01	3528955	4528955	4028955	0.2263	3.4709	4.1945	2.8551
SBW17-2	pLARmEB	TM66981	TM66960_TM66973_TM66981_TM66984	D08	1682088	2914354	2373223	-0.1994	3.8617	4.6063	5.9159
SBW17-2	pLARmEB	TM77868	TM77868	D12	10366242	11366242	10866242	-1.4223e-05	3.0425	3.7405	1.8781e-09
SBW17-2	pKWmEB	TM36895	TM36895	A10	100129872	101129872	100629872	-0.2165	3.4729	4.1966	4.3452
SBW17-2	pKWmEB	TM47985	TM47985	D01	3528955	4528955	4028955	0.1991	3.447	4.1693	2.4597
SBW17-2	pKWmEB	TM50369	TM50369	D02	1284988	2284988	1784988	-0.1296	5.5863	6.4048	2.9064
SBW17-2	pKWmEB	TM66274	TM66274	D07	45050063	46050063	45550063	-0.361	3.2073	3.9155	10.6006
SBW17-2	pKWmEB	TM69714	TM69714_TM69725_TM69745	D08	61100875	62321185	61600875	0.1757	3.2698	3.9818	3.4427
SBW17-2	pKWmEB	TM66981	TM66960_TM66973_TM66981_TM66984	D08	1682088	2914354	2373223	-0.2442	3.4251	4.1461	14.9401
SBW17-2	pKWmEB	TM75435	TM75435_TM75436	D11	4936703	5945939	5436703	-0.1773	3.886	4.6318	3.4647
SBW17-2	ISIS EM-BLASSO	TM36895	TM36895	A10	100129872	101129872	100629872	-0.197	3.0198	3.7163	2.4689
SBW17-2	ISIS EM-BLASSO	TM47985	TM47985	D01	3528955	4528955	4028955	0.2207	4.6635	5.4456	2.7405
SBW17-2	ISIS EM-BLASSO	TM66981	TM66960_TM66973_TM66981_TM66984	D08	1682088	2914354	2373223	-0.2378	3.6712	4.4058	8.4821
SBW16-3	mrMLM	TM3633	TM3633_TM3634	A01	98369090	99384421	98869090	0.2292	4.0399	4.79343	5.0175
SBW16-3	mrMLM	TM52989	TM52989	D02	60839140	61839140	61339140	0.5403	3.485	4.20941	16.8434
SBW16-3	mrMLM	TM56558	TM56550_TM56558	D04	48103853	49198364	48698364	0.1916	3.029	3.72611	3.0649
SBW16-3	FASTmrMLM	TM3633	TM3633_TM3634	A01	98369090	99384421	98869090	0.194	4.2291	4.9917	3.6838
SBW16-3	FASTmrMLM	TM52989	TM52989	D02	60839140	61839140	61339140	0.4197	3.658	4.3919	10.4092
SBW16-3	FASTmrEMMA	TM40540	TM40540	A12	9147634	10147634	9647634	0.0006	3.606	4.3372	8.5908e-06
SBW16-3	FASTmrEMMA	TM50607	TM50585_TM50586_TM50588_TM50593_TM50607	D02	4448368	5708718	5208718	-0.3368	3.1929	3.9003	1.6584
SBW16-3	FASTmrEMMA	TM56603	TM56601_TM56603	D04	49081272	50095069	49595069	0.3926	3.6365	4.3693	3.6735
SBW16-3	pLARmEB	TM3633	TM3633_TM3634	A01	98369090	99384421	98869090	0.1856	3.5484	4.2763	3.1594
SBW16-3	pLARmEB	TM40540	TM40540	A12	9147634	10147634	9647634	0.1532	3.5495	4.2775	2.1672
SBW16-3	pLARmEB	TM56601	TM56601_TM56603	D04	49081272	50095069	49581272	0.3731	3.3114	4.0258	12.7158
SBW16-3	pKWmEB	TM3633	TM3633_TM3634	A01	98369090	99384421	98869090	0.2134	3.9412	4.6898	5.7669
SBW16-3	pKWmEB	TM18467	TM18467	A06	101361383	102361383	101861383	0.3787	3.773	4.513	5.1748
SBW16-3	pKWmEB	TM52989	TM52989	D02	60839140	61839140	61339140	0.3486	3.7227	4.4601	16.2257
SBW16-3	ISIS EM-BLASSO	TM50607	TM50585_TM50586_TM50588_TM50593_TM50607	D02	4448368	5708718	5208718	-0.1943	3.5157	4.2418	2.0519
SBW16-3	ISIS EM-BLASSO	TM52989	TM52989	D02	60839140	61839140	61339140	0.4949	5.0052	5.8015	13.1313
SBW16-3	ISIS EM-BLASSO	TM53045	TM53045	D02	61427452	62427452	61927452	-0.5232	3.2727	3.9848	7.7583
SBW16-3	ISIS EM-BLASSO	TM56558	TM56550_TM56558	D04	48103853	49198364	48698364	0.2078	6.3274	7.1713	3.3501
SBW16-3	ISIS EM-BLASSO	TM66705	TM66698_TM66705	D07	52500150	53557410	53057410	0.1849	4.7137	5.498	2.1392
SBW16-3	ISIS EM-BLASSO	TM73436	TM73436	D10	4987979	5987979	5487979	-0.3256	4.4195	5.1909	8.2247
SBW16-4	mrMLM	TM3633	TM3633_TM3634	A01	98369090	99384421	98869090	0.1988	6.2857	7.12821	6.0546
SBW16-4	mrMLM	TM56603	TM56601_TM56603	D04	49081272	50095069	49595069	0.2091	6.5341	7.38452	6.6257
SBW16-4	FASTmrMLM	TM3633	TM3633_TM3634	A01	98369090	99384421	98869090	0.1862	6.4448	7.2924	5.2766
SBW16-4	FASTmrMLM	TM52044	TM52041_TM52044	D02	48905207	50012158	49512158	0.4682	3.3512	4.068	5.7748
SBW16-4	FASTmrMLM	TM56603	TM56601_TM56603	D04	49081272	50095069	49595069	0.1877	6.2632	7.105	5.306
SBW16-4	FASTmrMLM	TM77724	TM77721_TM77724	D12	6763519	7856856	7356856	-0.2667	3.7396	4.4779	9.7708
SBW16-4	pLARmEB	TM3633	TM3633_TM3634	A01	98369090	99384421	98869090	0.1761	6.0238	6.8576	3.3893
SBW16-4	pLARmEB	TM57073	TM57073	D05	8062384	9062384	8562384	-0.2398	4.4838	5.2581	2.6544
SBW16-4	pLARmEB	TM57617	TM57617_TM57620	D05	24003566	25106287	24503566	0.1345	3.7623	4.5018	1.862
SBW16-4	pLARmEB	TM77724	TM77721_TM77724	D12	6763519	7856856	7356856	-0.296	4.0175	4.7699	8.6379
SBW16-4	pKWmEB	TM3633	TM3633_TM3634	A01	98369090	99384421	98869090	0.154	5.5482	6.3653	4.7651
SBW16-4	pKWmEB	TM50607	TM50585_TM50586_TM50588_TM50593_TM50607	D02	4448368	5708718	5208718	-0.2143	4.4944	5.2692	6.0897
SBW16-4	pKWmEB	TM56603	TM56601_TM56603	D04	49081272	50095069	49595069	0.1635	4.5762	5.3546	6.1713
SBW16-4	pKWmEB	TM77724	TM77721_TM77724	D12	6763519	7856856	7356856	-0.2704	4.0879	4.8438	19.034
SBW16-4	ISIS EM-BLASSO	TM3633	TM3633_TM3634	A01	98369090	99384421	98869090	0.148	4.7394	5.5248	3.3541
SBW16-4	ISIS EM-BLASSO	TM9812	TM9812_TM9817_TM9821_TM9835	A04	59735276	61056214	60235276	0.1014	3.2995	4.0132	1.1537
SBW16-4	ISIS EM-BLASSO	TM56603	TM56601_TM56603	D04	49081272	50095069	49595069	0.1351	3.6622	4.3963	2.7653
SBW16-4	ISIS EM-BLASSO	TM57073	TM57073	D05	8062384	9062384	8562384	-0.2095	3.8218	4.5644	2.8399
SBW16-4	ISIS EM-BLASSO	TM57617	TM57617_TM57620	D05	24003566	25106287	24503566	0.1715	6.186	7.0252	4.2469
SBW16-4	ISIS EM-BLASSO	TM77724	TM77721_TM77724	D12	6763519	7856856	7356856	-0.3027	4.551	5.3283	12.6589
SBW17-3	pKWmEB	TM50123	TM50123_TM50124	D01	58628966	59631579	59128966	-0.5312	3.6488	4.3822	15.7044
SBW17-3	ISIS EM-BLASSO	TM50123	TM50123_TM50124	D01	58628966	59631579	59128966	-0.628	3.4721	4.1958	11.8129
SBW17-3	ISIS EM-BLASSO	TM77494	TM77494	D12	2879362	3879362	3379362	-0.1105	3.7651	4.5047	1.247
SBW17-4	mrMLM	TM47180	TM47179_TM47180_TM47183	A13	69793680	71007948	70383840	0.3863	3.3756	4.09377	13.0277
SBW17-4	mrMLM	TM50593	TM50585_TM50586_TM50588_TM50593_TM50607	D02	4448368	5708718	5028185	-0.247	4.3636	5.13246	6.2473
SBW17-4	mrMLM	TM67081	TM67081	D08	3484512	4484512	3984512	-0.2288	3.0649	3.76429	4.7313
SBW17-4	FASTmrMLM	TM20952	TM20952	A07	67906939	68906939	68406939	-0.1752	4.0957	4.852	3.5203
SBW17-4	FASTmrMLM	TM50593	TM50585_TM50586_TM50588_TM50593_TM50607	D02	4448368	5708718	5028185	-0.2095	5.5144	6.3303	4.7884
SBW17-4	FASTmrEMMA	TM11004	TM11004	A05	21099698	22099698	21599698	-0.4105	4.5165	5.2922	2.9455
SBW17-4	FASTmrEMMA	TM50593	TM50585_TM50586_TM50588_TM50593_TM50607	D02	4448368	5708718	5028185	-0.3553	3.2668	3.9786	3.4302
SBW17-4	FASTmrEMMA	TM54429	TM54417_TM54429	D03	25216956	26323780	25823780	-0.0002	3.554	4.2822	6.1475e-07
SBW17-4	FASTmrEMMA	TM70423	TM70420_TM70423	D09	7060657	8171442	7671442	-0.0002	4.2942	5.0599	5.083e-07
SBW17-4	pLARmEB	TM20952	TM20952	A07	67906939	68906939	68406939	-0.1911	4.0978	4.8542	3.6018
SBW17-4	pLARmEB	TM42499	TM42489_TM42492_TM42499_TM42509	A12	72447838	73611670	73061783	0.4441	5.185	5.9884	13.4509
SBW17-4	pLARmEB	TM47180	TM47179_TM47180_TM47183	A13	69793680	71007948	70383840	0.3423	4.4179	5.1892	9.3723
SBW17-4	pLARmEB	TM50585	TM50585_TM50586_TM50588_TM50593_TM50607	D02	4448368	5708718	4948368	-0.1653	3.4256	4.1466	2.4916
SBW17-4	pKWmEB	TM47183	TM47179_TM47180_TM47183	A13	69793680	71007948	70507948	-0.1562	3.1309	3.8344	4.575
SBW17-4	pKWmEB	TM43460	TM43460	A13	4986302	5986302	5486302	7.0178e-05	3.1856	3.8925	2.2155
SBW17-4	pKWmEB	TM50585	TM50585_TM50586_TM50588_TM50593_TM50607	D02	4448368	5708718	4948368	-0.1889	4.3028	5.0689	6.6908
SBW17-4	pKWmEB	TM70423	TM70420_TM70423	D09	7060657	8171442	7671442	-0.1943	3.5178	4.244	5.9616
SBW17-4	ISIS EM-BLASSO	TM20982	TM20982	A07	68391479	69391479	68891479	-0.3931	4.175	4.9351	15.0763
SBW17-4	ISIS EM-BLASSO	TM42499	TM42489_TM42492_TM42499_TM42509	A12	72447838	73611670	73061783	0.4338	4.3355	5.1031	12.6761
SBW17-4	ISIS EM-BLASSO	TM47179	TM47179_TM47180_TM47183	A13	69793680	71007948	70293680	-0.1647	3.6109	4.3423	2.2752
SBW17-4	ISIS EM-BLASSO	TM50593	TM50585_TM50586_TM50588_TM50593_TM50607	D02	4448368	5708718	5028185	-0.1732	4.2685	5.033	2.7791
SBW16-5	pLARmEB	TM9647	TM9647	A04	55894075	56894075	56394075	-0.196	3.5885	4.3187	2.4576
SBW16-5	pLARmEB	TM42499	TM42489_TM42492_TM42499_TM42509	A12	72447838	73611670	73061783	0.5165	4.6508	5.4324	15.4995
SBW16-5	pLARmEB	TM57073	TM57073	D05	8062384	9062384	8562384	-0.3381	3.6847	4.4201	4.0649
SBW16-5	pKWmEB	TM42509	TM42489_TM42492_TM42499_TM42509	A12	72447838	73611670	73111670	-0.1933	3.5405	4.268	4.3942
SBW16-5	pKWmEB	TM57073	TM57073	D05	8062384	9062384	8562384	-0.3172	4.1115	4.8685	7.2979
SBW16-5	ISIS EM-BLASSO	TM9812	TM9812_TM9817_TM9821_TM9835	A04	59735276	61056214	60235276	0.1366	3.087	3.7878	1.2451
SBW16-5	ISIS EM-BLASSO	TM57073	TM57073	D05	8062384	9062384	8562384	-0.3663	4.541	5.3178	5.1603
SBW16-6	mrMLM	TM11685	TM11685	A05	33673922	34673922	34173922	-0.1539	3.5809	4.31064	2.9779
SBW16-6	mrMLM	TM39470	TM39467_TM39469_TM39470	A11	84394161	85486556	84986556	-0.5374	5.1372	5.93878	19.8842
SBW16-6	mrMLM	TM39191	TM39191	A11	77232247	78232247	77732247	-0.2465	3.3972	4.11662	3.3432
SBW16-6	mrMLM	TM56443	TM56443	D04	45649050	46649050	46149050	-0.3974	4.8759	5.66697	4.7623
SBW16-6	mrMLM	TM57073	TM57073	D05	8062384	9062384	8562384	-0.3315	6.1545	6.99271	5.7793
SBW16-6	mrMLM	TM79962	TM79962	D12	58301492	59301492	58801492	-0.3056	3.7256	4.46313	11.8412
SBW16-6	FASTmrMLM	TM11685	TM11685	A05	33673922	34673922	34173922	-0.1231	3.4941	4.219	2.1687
SBW16-6	FASTmrMLM	TM39191	TM39191	A11	77232247	78232247	77732247	-0.2274	3.9958	4.7472	3.2396
SBW16-6	FASTmrMLM	TM39470	TM39467_TM39469_TM39470	A11	84394161	85486556	84986556	-0.3397	3.461	4.1841	9.0425
SBW16-6	FASTmrMLM	TM57073	TM57073	D05	8062384	9062384	8562384	-0.3769	8.4657	9.3694	8.5013
SBW16-6	FASTmrMLM	TM79962	TM79962	D12	58301492	59301492	58801492	-0.2736	3.9884	4.7394	10.7974
SBW16-6	FASTmrEMMA	TM43397	TM43397_TM43401	A13	4237676	5277374	4737676	-0.217	3.1223	3.8253	1.6922
SBW16-6	FASTmrEMMA	TM50607	TM50585_TM50586_TM50588_TM50593_TM50607	D02	4448368	5708718	5208718	-0.3707	3.7358	4.4739	3.1213
SBW16-6	FASTmrEMMA	TM57073	TM57073	D05	8062384	9062384	8562384	-0.6159	5.1176	5.9185	5.8551
SBW16-6	pLARmEB	TM39470	TM39467_TM39469_TM39470	A11	84394161	85486556	84986556	-0.2554	3.8827	4.6284	3.7053
SBW16-6	pLARmEB	TM42499	TM42489_TM42492_TM42499_TM42509	A12	72447838	73611670	73061783	0.3182	3.1955	3.903	7.1748
SBW16-6	pLARmEB	TM52870	TM52867_TM52870	D02	59408559	60433062	59933062	0.1982	4.7656	5.5521	3.5064
SBW16-6	pLARmEB	TM56443	TM56443	D04	45649050	46649050	46149050	-2.5755e-05	4.1697	4.9295	1.6501e-08
SBW16-6	pLARmEB	TM57073	TM57073	D05	8062384	9062384	8562384	-0.3668	6.712	7.5679	5.8359
SBW16-6	pKWmEB	TM13566	TM13566	A06	238170	1238170	738170	-0.2208	3.0743	3.7743	8.4882
SBW16-6	pKWmEB	TM39191	TM39191	A11	77232247	78232247	77732247	-0.2	4.1108	4.8678	5.2643
SBW16-6	pKWmEB	TM50607	TM50585_TM50586_TM50588_TM50593_TM50607	D02	4448368	5708718	5208718	-0.1803	3.6693	4.4038	3.6549
SBW16-6	pKWmEB	TM57073	TM57073	D05	8062384	9062384	8562384	-0.3171	6.6034	7.456	6.9065
SBW16-6	pKWmEB	TM72975	TM72975	D09	49791382	50791382	50291382	0.1309	3.4923	4.2171	3.3255
SBW16-6	pKWmEB	TM79962	TM79962	D12	58301492	59301492	58801492	-0.272	4.029	4.782	14.508
SBW16-6	ISIS EM-BLASSO	TM11685	TM11685	A05	33673922	34673922	34173922	-0.0812	3.4473	4.1696	0.8958
SBW16-6	ISIS EM-BLASSO	TM39191	TM39191	A11	77232247	78232247	77732247	-0.1839	3.8294	4.5723	2.0118
SBW16-6	ISIS EM-BLASSO	TM39470	TM39467_TM39469_TM39470	A11	84394161	85486556	84986556	-0.3996	3.6731	4.4078	11.8792
SBW16-6	ISIS EM-BLASSO	TM40262	TM40262	A12	5417909	6417909	5917909	0.0003	3.8804	4.626	1.3316e-05
SBW16-6	ISIS EM-BLASSO	TM43397	TM43397_TM43401	A13	4237676	5277374	4737676	-0.0844	3.186	3.8929	0.9191
SBW16-6	ISIS EM-BLASSO	TM56443	TM56443	D04	45649050	46649050	46149050	-0.3189	5.1501	5.9522	3.3152
SBW16-6	ISIS EM-BLASSO	TM57073	TM57073	D05	8062384	9062384	8562384	-0.2966	5.8578	6.686	4.9983
SBW16-6	ISIS EM-BLASSO	TM79962	TM79962	D12	58301492	59301492	58801492	-0.2512	3.4473	4.1696	8.6448
SBW17-5	mrMLM	TM75816	TM75816	D11	12597380	13597380	13097380	-0.3765	3.1044	3.80627	9.9344
SBW17-5	pKWmEB	TM66698	TM66698_TM66705	D07	52500150	53557410	53000150	-0.213	3.8461	4.5899	4.761
SBW17-5	ISIS EM-BLASSO	TM32526	TM32526	A09	49988582	50988582	50488582	-0.1952	3.8297	4.5727	2.9281
SBW17-5	ISIS EM-BLASSO	TM36639	TM36634_TM36639	A10	95697852	96726032	96226032	-0.5594	4.4694	5.243	16.4472
SBW17-5	ISIS EM-BLASSO	TM55317	TM55317	D03	44447963	45447963	44947963	0.3043	3.2457	3.9562	2.4508
SBW17-6	FASTmrMLM	TM57073	TM57073	D05	8062384	9062384	8562384	-0.2714	3.8823	4.628	2.9979
SBW17-6	pLARmEB	TM43088	TM43080_TM43083_TM43088	A12	85506686	86561258	86061258	0.2	3.7159	4.4529	2.7299
SBW17-6	pLARmEB	TM48752	TM48752	D01	27386941	28386941	27886941	0.2289	4.3213	5.0882	3.8082
SBW17-6	pLARmEB	TM75436	TM75435_TM75436	D11	4936703	5945939	5445939	-0.2796	4.5593	5.3369	3.1778
SBW17-6	pKWmEB	TM10530	TM10527_TM10530	A05	10598699	11642306	11142306	0.1179	3.2601	3.9715	2.4517
SBW17-6	pKWmEB	TM48930	TM48930	D01	38835668	39835668	39335668	-0.396	4.3238	5.0908	14.2738
SBW17-6	pKWmEB	TM52205	TM52205	D02	52378885	53378885	52878885	0.1623	3.4101	4.1303	3.2281
SBW17-6	pKWmEB	TM57073	TM57073	D05	8062384	9062384	8562384	-0.2458	3.3988	4.1183	4.5688
SBW17-6	pKWmEB	TM75436	TM75435_TM75436	D11	4936703	5945939	5445939	-0.2834	6.7478	7.6048	5.2033
SBW17-6	ISIS EM-BLASSO	TM3594	TM3594	A01	97392451	98392451	97892451	0.1653	4.6882	5.4714	2.1915
SBW17-6	ISIS EM-BLASSO	TM38172	TM38172	A11	36793735	37793735	37293735	0.2	4.2491	5.0127	3.4067
SBW17-6	ISIS EM-BLASSO	TM48800	TM48800	D01	32242515	33242515	32742515	-0.1619	4.1545	4.9136	2.4604
SBW17-6	ISIS EM-BLASSO	TM57073	TM57073	D05	8062384	9062384	8562384	-0.2926	3.5391	4.2665	3.4842
SBW17-6	ISIS EM-BLASSO	TM75436	TM75435_TM75436	D11	4936703	5945939	5445939	-0.3495	4.6551	5.4369	5.0886
SBW17-6	ISIS EM-BLASSO	TM79489	TM79489	D12	50267538	51267538	50767538	-0.4261	3.2238	3.933	4.0393
SBW16-7	mrMLM	TM11687	TM11687	A05	34214027	35214027	34714027	-0.2561	3.3488	4.06542	4.0777
SBW16-7	mrMLM	TM52867	TM52867_TM52870	D02	59408559	60433062	59908559	-0.6127	4.0328	4.78598	18.519
SBW16-7	mrMLM	TM57073	TM57073	D05	8062384	9062384	8562384	-0.4597	6.4499	7.29767	7.7182
SBW16-7	FASTmrEMMA	TM57073	TM57073	D05	8062384	9062384	8562384	-0.8562	4.9493	5.7434	7.2787
SBW16-7	pLARmEB	TM42936	TM42936	A12	81355455	82355455	81855455	-0.117	3.094	3.7952	0.8016
SBW16-7	pLARmEB	TM57073	TM57073	D05	8062384	9062384	8562384	-0.3769	4.8315	5.6207	3.4873
SBW16-7	pKWmEB	TM11687	TM11687	A05	34214027	35214027	34714027	-0.2506	3.9499	4.699	5.4183
SBW16-7	pKWmEB	TM50040	TM50039_TM50040_TM50043	D01	56702872	57800770	57257915	-0.1591	3.2076	3.9158	3.4124
SBW16-7	pKWmEB	TM56662	TM56662_TM56668	D04	49729756	50762575	50229756	0.6202	3.2839	3.9967	15.4882
SBW16-7	pKWmEB	TM57073	TM57073	D05	8062384	9062384	8562384	-0.4342	5.6434	6.464	9.2351
SBW16-7	pKWmEB	TM75060	TM75060_TM75069	D10	59443380	60613897	59943380	0.2207	3.3189	4.0338	2.9704
SBW16-7	ISIS EM-BLASSO	TM11687	TM11687	A05	34214027	35214027	34714027	-0.2057	3.5387	4.2661	2.8841
SBW16-7	ISIS EM-BLASSO	TM56662	TM56662_TM56668	D04	49729756	50762575	50229756	0.6124	3.8728	4.618	10.9742
SBW16-7	ISIS EM-BLASSO	TM57073	TM57073	D05	8062384	9062384	8562384	-0.4169	6.6657	7.5202	6.9636
SBW16-7	ISIS EM-BLASSO	TM75060	TM75060_TM75069	D10	59443380	60613897	59943380	0.2498	3.0559	3.7547	2.2011
SBW16-8	mrMLM	TM47860	TM47852_TM47858_TM47860_TM47862	D01	1327152	2532223	1949485	-0.2152	4.1184	4.87575	4.0722
SBW16-8	mrMLM	TM64033	TM64033_TM64041_TM64043_TM64057_TM64061	D07	17945478	19273363	18445478	0.221	3.2655	3.97721	4.4226
SBW16-8	FASTmrMLM	TM35366	TM35362_TM35365_TM35366	A10	65024917	66186233	65686233	0.2971	4.8705	5.6614	3.6972
SBW16-8	FASTmrMLM	TM74764	TM74764	D10	54381447	55381447	54881447	0.7436	5.8264	6.6535	21.8534
SBW16-8	FASTmrEMMA	TM38522	TM38522	A11	56147664	57147664	56647664	-0.3809	3.3751	4.0933	2.2099
SBW16-8	FASTmrEMMA	TM43401	TM43397_TM43401	A13	4237676	5277374	4777374	-0.4029	3.0735	3.7735	3.6804
SBW16-8	pLARmEB	TM3995	TM3989_TM3995	A02	4359049	5409648	4909648	-0.1603	3.2359	3.9458	1.9355
SBW16-8	pLARmEB	TM35365	TM35362_TM35365_TM35366	A10	65024917	66186233	65679765	0.2184	3.9716	4.7218	2.326
SBW16-8	pLARmEB	TM40233	TM40233	A12	4155261	5155261	4655261	0.4323	3.4363	4.158	7.5263
SBW16-8	pLARmEB	TM42936	TM42936	A12	81355455	82355455	81855455	-0.1836	4.9783	5.7736	3.0952
SBW16-8	pLARmEB	TM47858	TM47852_TM47858_TM47860_TM47862	D01	1327152	2532223	1943066	-0.1657	3.9116	4.6587	2.3389
SBW16-8	pKWmEB	TM3806	TM3806	A02	1282322	2282322	1782322	-0.2271	4.5154	5.2911	9.3821
SBW16-8	pKWmEB	TM21814	TM21814_TM21815	A08	1016028	2065645	1516028	-0.1431	3.0834	3.784	4.0323
SBW16-8	pKWmEB	TM30184	TM30184	A09	4012008	5012008	4512008	0.1335	3.9656	4.7155	2.8938
SBW16-8	pKWmEB	TM38522	TM38522	A11	56147664	57147664	56647664	-0.1882	3.7133	4.4502	3.7466
SBW16-8	pKWmEB	TM69918	TM69918	D09	0	907179	407179	0.1682	3.2216	3.9307	4.702
SBW16-8	ISIS EM-BLASSO	TM35366	TM35362_TM35365_TM35366	A10	65024917	66186233	65686233	0.1926	3.0448	3.7429	1.7416
SBW16-8	ISIS EM-BLASSO	TM38522	TM38522	A11	56147664	57147664	56647664	-0.2014	3.9168	4.6642	2.6061
SBW16-8	ISIS EM-BLASSO	TM47860	TM47852_TM47858_TM47860_TM47862	D01	1327152	2532223	1949485	-0.1999	5.5682	6.3861	3.514
SBW16-8	ISIS EM-BLASSO	TM50607	TM50585_TM50586_TM50588_TM50593_TM50607	D02	4448368	5708718	5208718	-0.212	3.3606	4.0779	2.5897
SBW16-8	ISIS EM-BLASSO	TM75345	TM75345	D11	2996460	3996460	3496460	-0.1875	3.248	3.9587	2.3294
SBW17-7	mrMLM	TM69543	TM69543	D08	59244520	60244520	59744520	-0.2374	3.7118	4.4486	5.4621
SBW17-7	pLARmEB	TM22819	TM22819	A08	22877428	23877428	23377428	-0.8899	3.6381	4.3709	17.7167
SBW17-7	pLARmEB	TM69685	TM69685	D08	60736530	61736530	61236530	0.1981	3.0593	3.7583	2.5474
SBW17-7	pKWmEB	TM29270	TM29270	A08	88006488	89006488	88506488	-0.128	3.0038	3.6993	4.111
SBW17-7	pKWmEB	TM69543	TM69543	D08	59244520	60244520	59744520	-0.1704	4.0822	4.8378	5.6508
SBW17-7	pKWmEB	TM75152	TM75152	D10	60912939	61912939	61412939	-0.2221	4.0342	4.7875	4.887
SBW17-7	pKWmEB	TM79697	TM79697	D12	54006406	55006406	54506406	0.2964	3.1893	3.8964	5.152
SBW17-7	ISIS EM-BLASSO	TM43418	TM43418_TM43423	A13	4630585	5718758	5130585	-0.1752	3.5388	4.2662	2.3037
SBW17-7	ISIS EM-BLASSO	TM66049	TM66049	D07	42372356	43372356	42872356	-0.2263	3.226	3.9353	1.9067
SBW17-7	ISIS EM-BLASSO	TM69543	TM69543	D08	59244520	60244520	59744520	-0.2264	5.4337	6.2466	4.9672
SBW17-7	ISIS EM-BLASSO	TM69829	TM69829	D08	63374273	64374273	63874273	-0.2517	4.0884	4.8443	2.4189
SBW17-8	FASTmrMLM	TM50444	TM50444_TM50455	D02	2226595	3352379	2726595	-0.1179	3.337	4.0529	1.2848
SBW17-8	FASTmrEMMA	TM39467	TM39467_TM39469_TM39470	A11	84394161	85486556	84894161	-2.7919e-05	4.5785	5.357	5.1462e-09
SBW17-8	pLARmEB	TM43083	TM43080_TM43083_TM43088	A12	85506686	86561258	86026066	0.2326	5.8109	6.6374	4.0967
SBW17-8	pLARmEB	TM59965	TM59965	D06	22941313	23941313	23441313	-0.1502	3.7372	4.4753	1.7209
SBW17-8	pLARmEB	TM66097	TM66097	D07	42691482	43691482	43191482	-0.2783	4.1702	4.93	3.2283
SBW17-8	pKWmEB	TM39469	TM39467_TM39469_TM39470	A11	84394161	85486556	84930104	0.8294	5.2227	6.0276	25.4134
SBW17-8	pKWmEB	TM59802	TM59802	D06	19336176	20336176	19836176	-0.2538	4.2722	5.0368	5.3138
SBW17-8	pKWmEB	TM66097	TM66097	D07	42691482	43691482	43191482	-0.2262	3.17	3.8759	3.445
SBW17-8	ISIS EM-BLASSO	TM5513	TM5513_TM5515	A02	77539833	78640867	78039833	0.2327	3.0305	3.7277	2.7949
SBW17-8	ISIS EM-BLASSO	TM43083	TM43080_TM43083_TM43088	A12	85506686	86561258	86026066	0.2078	4.0082	4.7602	3.3234
SBW17-8	ISIS EM-BLASSO	TM59802	TM59802	D06	19336176	20336176	19836176	-0.2192	3.4461	4.1683	2.9983
SBW17-8	ISIS EM-BLASSO	TM66049	TM66049	D07	42372356	43372356	42872356	-0.2639	3.7204	4.4577	2.6791
SBW_BLUP-A	mrMLM	TM21493	TM21493_TM21494_TM21505	A07	73967811	75161474	74467811	-0.4126	4.1145	4.87166	4.3174
SBW_BLUP-A	mrMLM	TM35886	TM35886	A10	84528202	85528202	85028202	-0.2811	3.1167	3.81934	4.986
SBW_BLUP-A	mrMLM	TM56762	TM56762	D05	1520010	2520010	2020010	-0.2745	3.888	4.63394	4.2192
SBW_BLUP-A	mrMLM	TM69725	TM69714_TM69725_TM69745	D08	61100875	62321185	61667788	-0.7679	3.2608	3.97222	14.9529
SBW_BLUP-A	mrMLM	TM74751	TM74747_TM74748_TM74749_TM74751	D10	52796308	53819487	53319487	-0.2475	3.4527	4.17529	3.7271
SBW_BLUP-A	FASTmrMLM	TM35366	TM35362_TM35365_TM35366	A10	65024917	66186233	65686233	0.3538	4.202	4.9633	3.9273
SBW_BLUP-A	FASTmrMLM	TM35886	TM35886	A10	84528202	85528202	85028202	-0.1837	3.3841	4.1028	2.1247
SBW_BLUP-A	FASTmrMLM	TM69725	TM69714_TM69725_TM69745	D08	61100875	62321185	61667788	-0.5109	3.4835	4.2078	6.6069
SBW_BLUP-A	FASTmrMLM	TM74764	TM74764	D10	54381447	55381447	54881447	0.7417	4.1559	4.915	16.2899
SBW_BLUP-A	FASTmrEMMA	TM56668	TM56662_TM56668	D04	49729756	50762575	50262575	0.5652	4.703	5.4868	4.2596
SBW_BLUP-A	FASTmrEMMA	TM56762	TM56762	D05	1520010	2520010	2020010	-0.4691	3.4755	4.1993	2.9406
SBW_BLUP-A	pLARmEB	TM13700	TM13700	A06	2122801	3122801	2622801	0.3307	3.1856	3.8925	6.0463
SBW_BLUP-A	pLARmEB	TM21814	TM21814_TM21815	A08	1016028	2065645	1516028	-0.2129	3.9442	4.693	2.531
SBW_BLUP-A	pLARmEB	TM30856	TM30856	A09	18678334	19678334	19178334	1.7147e-05	3.1953	3.9028	7.2078e-09
SBW_BLUP-A	pLARmEB	TM35366	TM35362_TM35365_TM35366	A10	65024917	66186233	65686233	0.3776	5.6395	6.4599	4.1301
SBW_BLUP-A	pLARmEB	TM35886	TM35886	A10	84528202	85528202	85028202	-0.1825	3.0262	3.7231	1.9355
SBW_BLUP-A	pLARmEB	TM43983	TM43983	A13	22898860	23898860	23398860	0.2423	3.7016	4.4379	3.4731
SBW_BLUP-A	pLARmEB	TM56762	TM56762	D05	1520010	2520010	2020010	-0.2527	4.6736	5.4562	3.2921
SBW_BLUP-A	pKWmEB	TM21494	TM21493_TM21494_TM21505	A07	73967811	75161474	74506369	-0.4117	6.5683	7.4198	6.1117
SBW_BLUP-A	pKWmEB	TM35886	TM35886	A10	84528202	85528202	85028202	-0.241	5.9992	6.8322	4.1671
SBW_BLUP-A	pKWmEB	TM55320	TM55320	D03	45027226	46027226	45527226	-0.7892	3.1043	3.8062	10.4187
SBW_BLUP-A	pKWmEB	TM69725	TM69714_TM69725_TM69745	D08	61100875	62321185	61667788	-0.5654	3.2646	3.9763	17.5291
SBW_BLUP-A	pKWmEB	TM74751	TM74747_TM74748_TM74749_TM74751	D10	52796308	53819487	53319487	-0.1954	3.6995	4.4356	3.3909
SBW_BLUP-A	ISIS EM-BLASSO	TM21494	TM21493_TM21494_TM21505	A07	73967811	75161474	74506369	-0.2677	3.3355	4.0513	2.2822
SBW_BLUP-A	ISIS EM-BLASSO	TM30184	TM30184	A09	4012008	5012008	4512008	0.1531	3.0396	3.7374	1.4044
SBW_BLUP-A	ISIS EM-BLASSO	TM32926	TM32926_TM32931	A09	54658182	55785591	55158182	-0.1885	3.0981	3.7996	2.0848
SBW_BLUP-A	ISIS EM-BLASSO	TM35366	TM35362_TM35365_TM35366	A10	65024917	66186233	65686233	0.3163	4.8606	5.651	3.1859
SBW_BLUP-A	ISIS EM-BLASSO	TM35886	TM35886	A10	84528202	85528202	85028202	-0.2018	4.2626	5.0268	2.6044
SBW_BLUP-A	ISIS EM-BLASSO	TM43880	TM43880	A13	17700867	18700867	18200867	0.2183	4.2545	5.0183	3.0879
SBW_BLUP-A	ISIS EM-BLASSO	TM56762	TM56762	D05	1520010	2520010	2020010	-0.1812	3.3461	4.0626	1.8625
SBW_BLUP-A	ISIS EM-BLASSO	TM69725	TM69714_TM69725_TM69745	D08	61100875	62321185	61667788	-0.5925	3.6288	4.3611	9.0164
SBW_BLUP-A	ISIS EM-BLASSO	TM74751	TM74747_TM74748_TM74749_TM74751	D10	52796308	53819487	53319487	-0.1984	4.0188	4.7713	2.4244
SBW_BLUP-B	mrMLM	TM13621	TM13621	A06	956575	1956575	1456575	-0.2047	3.5162	4.24236	3.6675
SBW_BLUP-B	mrMLM	TM56686	TM56686	D04	49968160	50968160	50468160	-0.5933	4.4134	5.18452	19.4463
SBW_BLUP-B	mrMLM	TM69725	TM69714_TM69725_TM69745	D08	61100875	62321185	61667788	-0.6449	4.0678	4.8227	14.3477
SBW_BLUP-B	FASTmrMLM	TM13621	TM13621	A06	956575	1956575	1456575	-0.153	3.2113	3.9197	2.3157
SBW_BLUP-B	FASTmrMLM	TM40242	TM40242	A12	4404551	5404551	4904551	0.1261	3.334	4.0498	1.5561
SBW_BLUP-B	FASTmrMLM	TM69725	TM69714_TM69725_TM69745	D08	61100875	62321185	61667788	-0.6893	5.9884	6.821	18.5312
SBW_BLUP-B	FASTmrMLM	TM80503	TM80503	D13	8592551	9592551	9092551	-0.2402	4.0648	4.8195	2.7903
SBW_BLUP-B	FASTmrEMMA	TM39497	TM39497	A11	84857456	85857456	85357456	0.3909	3.7552	4.4943	2.7888
SBW_BLUP-B	FASTmrEMMA	TM56603	TM56601_TM56603	D04	49081272	50095069	49595069	0.3622	4.0078	4.7597	3.0973
SBW_BLUP-B	FASTmrEMMA	TM57073	TM57073	D05	8062384	9062384	8562384	-0.536	3.1824	3.8891	2.826
SBW_BLUP-B	pLARmEB	TM3633	TM3633_TM3634	A01	98369090	99384421	98869090	0.1489	3.4917	4.2165	2.1479
SBW_BLUP-B	pLARmEB	TM9066	TM9063_TM9066	A04	9583826	10710126	10210126	-0.148	4.3845	5.1543	1.9587
SBW_BLUP-B	pLARmEB	TM10611	TM10611_TM10612_TM10619	A05	12316384	13382439	12816384	-0.1977	4.2099	4.9716	2.3804
SBW_BLUP-B	pLARmEB	TM35352	TM35352	A10	63839806	64839806	64339806	0.1422	3.5052	4.2307	1.4623
SBW_BLUP-B	pLARmEB	TM39497	TM39497	A11	84857456	85857456	85357456	0.1749	4.1067	4.8635	2.3085
SBW_BLUP-B	pLARmEB	TM40050	TM40012_TM40030_TM40043_TM40050_TM40054_TM40069	A12	302614	2043324	1332143	-0.1887	4.1671	4.9268	3.0653
SBW_BLUP-B	pLARmEB	TM40242	TM40242	A12	4404551	5404551	4904551	0.1875	5.5338	6.3504	3.4383
SBW_BLUP-B	pKWmEB	TM8282	TM8282	A03	96607137	97607137	97107137	-0.1427	3.0596	3.7587	2.0657
SBW_BLUP-B	pKWmEB	TM13621	TM13621	A06	956575	1956575	1456575	-0.1733	4.4917	5.2663	2.7425
SBW_BLUP-B	pKWmEB	TM42057	TM42057	A12	61308221	62308221	61808221	-0.2617	3.0774	3.7776	7.0971
SBW_BLUP-B	pKWmEB	TM56601	TM56601_TM56603	D04	49081272	50095069	49581272	0.3974	5.1747	5.9777	12.2685
SBW_BLUP-B	pKWmEB	TM57153	TM57153	D05	9208162	10208162	9708162	0.4333	4.2448	5.0082	10.1511
SBW_BLUP-B	pKWmEB	TM69725	TM69714_TM69725_TM69745	D08	61100875	62321185	61667788	-0.6562	6.0777	6.9133	14.6394
SBW_BLUP-B	pKWmEB	TM77724	TM77721_TM77724	D12	6763519	7856856	7356856	-0.3548	4.878	5.6692	12.9894
SBW_BLUP-B	ISIS EM-BLASSO	TM40242	TM40242	A12	4404551	5404551	4904551	0.0948	3.7604	4.4998	0.8785
SBW_BLUP-B	ISIS EM-BLASSO	TM69725	TM69714_TM69725_TM69745	D08	61100875	62321185	61667788	-0.6743	4.4019	5.1725	17.7288
SBW_BLUP-C	mrMLM	TM50236	TM50224_TM50236_TM50251	D02	0	951849	315722	0.3839	4.1342	4.89231	9.4492
SBW_BLUP-C	mrMLM	TM57073	TM57073	D05	8062384	9062384	8562384	-0.5353	7.4261	8.30276	9.5883
SBW_BLUP-C	FASTmrMLM	TM57073	TM57073	D05	8062384	9062384	8562384	-0.4073	5.6569	6.478	5.5522
SBW_BLUP-C	FASTmrEMMA	TM57073	TM57073	D05	8062384	9062384	8562384	-0.891	4.9128	5.7053	6.3834
SBW_BLUP-C	pLARmEB	TM19941	TM19933_TM19941_TM19955	A07	25385664	26569342	25949906	-0.2002	3.6262	4.3584	2.6406
SBW_BLUP-C	pLARmEB	TM36510	TM36510	A10	93904638	94904638	94404638	-0.2859	4.8842	5.6756	4.1681
SBW_BLUP-C	pLARmEB	TM57073	TM57073	D05	8062384	9062384	8562384	-0.3601	4.1563	4.9155	3.9634
SBW_BLUP-C	pKWmEB	TM5646	TM5646_TM5649_TM5662	A02	79997099	81187074	80497099	-0.2363	4.1834	4.9439	4.1612
SBW_BLUP-C	pKWmEB	TM13401	TM13401_TM13412_TM13414	A05	89352928	90485386	89852928	-0.329	3.9637	4.7135	15.4918
SBW_BLUP-C	pKWmEB	TM57073	TM57073	D05	8062384	9062384	8562384	-0.3848	5.2588	6.0651	8.1907
SBW_BLUP-C	ISIS EM-BLASSO	TM369	TM369	A01	6880153	7880153	7380153	-0.3048	3.3629	4.0803	2.8362
SBW_BLUP-C	ISIS EM-BLASSO	TM4486	TM4486	A02	16211345	17211345	16711345	-0.3609	3.8434	4.5871	10.0546
SBW_BLUP-C	ISIS EM-BLASSO	TM10694	TM10694	A05	14230259	15230259	14730259	-0.1772	3.2004	3.9082	2.1389
SBW_BLUP-C	ISIS EM-BLASSO	TM36510	TM36510	A10	93904638	94904638	94404638	-0.274	4.8857	5.6772	4.0134
SBW_BLUP-C	ISIS EM-BLASSO	TM42936	TM42936	A12	81355455	82355455	81855455	-0.1988	4.9704	5.7653	3.022
SBW_BLUP-C	ISIS EM-BLASSO	TM57115	TM57115	D05	8808672	9808672	9308672	0.6948	4.1315	4.8895	15.1055
SBW_BLUP-D	mrMLM	TM35365	TM35362_TM35365_TM35366	A10	65024917	66186233	65679765	0.3591	3.9828	4.73351	3.5626
SBW_BLUP-D	mrMLM	TM39095	TM39095	A11	76562213	77562213	77062213	0.9183	3.8609	4.60546	18.8062
SBW_BLUP-D	mrMLM	TM47756	TM47756	D01	0	931570	431570	-0.2901	4.402	5.1726	3.2696
SBW_BLUP-D	mrMLM	TM77381	TM77381	D12	1870350	2870350	2370350	1.1083	3.7973	4.53858	22.9134
SBW_BLUP-D	FASTmrMLM	TM3113	TM3113	A01	86035121	87035121	86535121	-0.3853	3.5049	4.2304	9.3499
SBW_BLUP-D	FASTmrMLM	TM35365	TM35362_TM35365_TM35366	A10	65024917	66186233	65679765	0.2773	3.9518	4.701	2.5372
SBW_BLUP-D	FASTmrMLM	TM74764	TM74764	D10	54381447	55381447	54881447	0.8396	4.3913	5.1614	20.4617
SBW_BLUP-D	FASTmrEMMA	TM57073	TM57073	D05	8062384	9062384	8562384	-0.8671	3.4777	4.2017	5.5242
SBW_BLUP-D	pLARmEB	TM2967	TM2967	A01	85057459	86057459	85557459	-0.2694	7.0556	7.9217	4.5421
SBW_BLUP-D	pLARmEB	TM22819	TM22819	A08	22877428	23877428	23377428	-0.9108	3.1877	3.8947	14.5758
SBW_BLUP-D	pLARmEB	TM42936	TM42936	A12	81355455	82355455	81855455	-0.216	5.3087	6.1169	2.8833
SBW_BLUP-D	pLARmEB	TM50607	TM50585_TM50586_TM50588_TM50593_TM50607	D02	4448368	5708718	5208718	-0.2585	3.6903	4.426	2.5074
SBW_BLUP-D	pLARmEB	TM56644	TM56624_TM56628_TM56644	D04	49343511	50480613	49980613	-0.2406	3.1752	3.8815	2.7627
SBW_BLUP-D	pKWmEB	TM3113	TM3113	A01	86035121	87035121	86535121	-0.4983	5.0042	5.8005	17.3133
SBW_BLUP-D	pKWmEB	TM8434	TM8434	A03	99405405	100405405	99905405	0.3775	3.3743	4.0924	12.0614
SBW_BLUP-D	pKWmEB	TM13663	TM13663	A06	1365106	2365106	1865106	0.4545	4.534	5.3105	19.5432
SBW_BLUP-D	pKWmEB	TM39095	TM39095	A11	76562213	77562213	77062213	0.374	3.1733	3.8794	4.6808
SBW_BLUP-D	pKWmEB	TM80410	TM80409_TM80410	D13	6579633	7671528	7171528	-0.3441	5.7555	6.5801	2.7658
SBW_BLUP-D	ISIS EM-BLASSO	TM3113	TM3113	A01	86035121	87035121	86535121	-0.3857	5.421	6.2334	8.0122
SBW_BLUP-D	ISIS EM-BLASSO	TM5257	TM5257	A02	73973337	74973337	74473337	-0.3335	3.2761	3.9884	1.4206
SBW_BLUP-D	ISIS EM-BLASSO	TM13663	TM13663	A06	1365106	2365106	1865106	0.4128	4.4043	5.175	8.8233
SBW_BLUP-D	ISIS EM-BLASSO	TM35365	TM35362_TM35365_TM35366	A10	65024917	66186233	65679765	0.2684	3.9204	4.668	2.0329
SBW_BLUP-D	ISIS EM-BLASSO	TM39095	TM39095	A11	76562213	77562213	77062213	0.6491	5.3187	6.1273	9.6021
SBW_BLUP-D	ISIS EM-BLASSO	TM42936	TM42936	A12	81355455	82355455	81855455	-0.2357	3.8406	4.5841	2.9539
SBW_BLUP-D	ISIS EM-BLASSO	TM47756	TM47756	D01	0	931570	431570	-0.1874	3.7533	4.4923	1.3944
SBW_BLUP-D	ISIS EM-BLASSO	TM74764	TM74764	D10	54381447	55381447	54881447	0.7126	3.6361	4.3688	12.6073
SBW_BLUP-D	ISIS EM-BLASSO	TM77381	TM77381	D12	1870350	2870350	2370350	0.7743	3.3256	4.0409	11.4267
SBW_BLUP-D	ISIS EM-BLASSO	TM80410	TM80409_TM80410	D13	6579633	7671528	7171528	-0.2129	3.0874	3.7882	0.9858
LP16-1	mrMLM	TM53419	TM53417_TM53419	D03	894357	1925231	1425231	-0.0282	5.1304	5.93171	15.284
LP16-1	mrMLM	TM55934	TM55934	D04	11019014	12019014	11519014	-0.0132	4.7474	5.53311	3.9009
LP16-1	mrMLM	TM72461	TM72461	D09	41141711	42141711	41641711	-0.0188	3.0244	3.72122	16.7125
LP16-1	mrMLM	TM75269	TM75269	D11	127155	1127155	627155	-0.01	3.372	4.08997	3.2515
LP16-1	FASTmrMLM	TM29891	TM29891_TM29894_TM29895	A08	100961561	102015914	101461561	2.1661e-05	3.5643	4.2931	2.3349e-05
LP16-1	FASTmrMLM	TM54741	TM54741	D03	30863584	31863584	31363584	0.0199	4.6244	5.4049	3.4449
LP16-1	FASTmrMLM	TM55934	TM55934	D04	11019014	12019014	11519014	-0.012	5.1562	5.9585	3.5063
LP16-1	FASTmrMLM	TM80416	TM80412_TM80414_TM80416	D13	7043336	8287560	7787560	0.0066	7.1067	7.9743	2.2678
LP16-1	FASTmrEMMA	TM55934	TM55934	D04	11019014	12019014	11519014	-0.0231	4.9659	5.7606	3.6612
LP16-1	pLARmEB	TM5649	TM5646_TM5649_TM5662	A02	79997099	81187074	80521614	0.002	3.756	4.4951	0.0769
LP16-1	pLARmEB	TM28996	TM28996	A08	79560106	80560106	80060106	0.0071	9.3625	10.2871	1.7312
LP16-1	pLARmEB	TM29891	TM29891_TM29894_TM29895	A08	100961561	102015914	101461561	0.0002	3.7885	4.5293	0.0029
LP16-1	pLARmEB	TM29894	TM29891_TM29894_TM29895	A08	100961561	102015914	101510144	0.0337	3.0509	3.7494	12.6959
LP16-1	pLARmEB	TM55223	TM55206_TM55216_TM55217_TM55218_TM55223	D03	42299450	43529568	43029568	-0.0089	5.4391	6.2522	2.4674
LP16-1	pLARmEB	TM55934	TM55934	D04	11019014	12019014	11519014	-0.0103	3.9047	4.6515	2.4745
LP16-1	pLARmEB	TM69767	TM69767_TM69769	D08	61889525	62984405	62389525	0.0001	3.2013	3.9091	0.0009
LP16-1	pLARmEB	TM74748	TM74747_TM74748_TM74749_TM74751	D10	52796308	53819487	53298527	0.0072	4.3701	5.1393	0.85
LP16-1	pLARmEB	TM75269	TM75269	D11	127155	1127155	627155	-0.0042	3.1146	3.8171	0.5812
LP16-1	pLARmEB	TM80416	TM80412_TM80414_TM80416	D13	7043336	8287560	7787560	0.0055	7.9837	8.8753	1.5094
LP16-1	pKWmEB	TM29895	TM29891_TM29894_TM29895	A08	100961561	102015914	101515914	-0.011	10.4943	11.4426	3.6212
LP16-1	pKWmEB	TM33533	TM33533_TM33538	A09	69063086	70092228	69563086	0.0052	4.6047	5.3843	16.7188
LP16-1	pKWmEB	TM40069	TM40012_TM40030_TM40043_TM40050_TM40054_TM40069	A12	302614	2043324	1543324	0.0047	4.6799	5.4627	3.851
LP16-1	pKWmEB	TM55934	TM55934	D04	11019014	12019014	11519014	-0.0083	3.6339	4.3665	4.8454
LP16-1	ISIS EM-BLASSO	TM55934	TM55934	D04	11019014	12019014	11519014	-0.0126	5.9892	6.8219	4.4176
LP16-1	ISIS EM-BLASSO	TM72502	TM72502	D09	41968378	42968378	42468378	0.0093	4.0287	4.7817	5.1774
LP16-1	ISIS EM-BLASSO	TM74983	TM74983	D10	57014048	58014048	57514048	0.0121	3.829	4.5719	5.0076
LP16-2	mrMLM	TM28887	TM28887	A08	76895773	77895773	77395773	0.0074	3.484	4.20836	5.1549
LP16-2	FASTmrMLM	TM28887	TM28887	A08	76895773	77895773	77395773	0.0048	3.0318	3.7291	2.1386
LP16-2	FASTmrMLM	TM40284	TM40268_TM40284	A12	5636007	6804599	6304599	-0.0024	3.7754	4.5155	0.4916
LP16-2	FASTmrMLM	TM79798	TM79797_TM79798	D12	55262421	56326700	55826700	-0.0003	4.4752	5.2491	0.0034
LP16-2	FASTmrMLM	TM79815	TM79815	D12	55543108	56543108	56043108	-0.0022	6.6321	7.4856	0.2549
LP16-2	FASTmrMLM	TM80412	TM80412_TM80414_TM80416	D13	7043336	8287560	7543336	0.0007	3.0821	3.7826	0.0417
LP16-2	FASTmrMLM	TM82168	TM82156_TM82168	D13	58492627	59589811	59089811	-0.0049	4.0211	4.7737	0.5269
LP16-2	FASTmrEMMA	TM37355	TM37355	A11	11710731	12710731	12210731	-0.003	3.3372	4.0532	0.1993
LP16-2	FASTmrEMMA	TM40284	TM40268_TM40284	A12	5636007	6804599	6304599	-0.0069	3.3478	4.0644	1.0383
LP16-2	FASTmrEMMA	TM49426	TM49426	D01	44660371	45660371	45160371	-0.0215	5.4819	6.2966	4.5983
LP16-2	FASTmrEMMA	TM56533	TM56532_TM56533_TM56534	D04	47662105	48677501	48170356	0.0104	3.8053	4.547	2.2714
LP16-2	pLARmEB	TM589	TM565_TM589	A01	9256363	10432709	9932709	-0.0004	3.7759	4.5161	0.0113
LP16-2	pLARmEB	TM3780	TM3778_TM3780_TM3782	A02	669766	1754691	1179491	-0.0008	6.0358	6.87	0.0332
LP16-2	pLARmEB	TM4052	TM4052	A02	5689106	6689106	6189106	9.9775e-05	4.7819	5.5691	0.0007
LP16-2	pLARmEB	TM8195	TM8195	A03	94396234	95396234	94896234	0.0005	6.3314	7.1754	0.009
LP16-2	pLARmEB	TM8458	TM8458	A04	0	895252	395252	-0.0003	3.3945	4.1138	0.0084
LP16-2	pLARmEB	TM8553	TM8553	A04	974225	1974225	1474225	0.0018	11.2394	12.2021	0.1668
LP16-2	pLARmEB	TM9063	TM9063_TM9066	A04	9583826	10710126	10083826	-0.0005	6.6199	7.473	0.0054
LP16-2	pLARmEB	TM11618	TM11604_TM11618_TM11619_TM11620_TM11628_TM11629_TM11631	A05	32077816	33400112	32774515	-0.0017	6.5577	7.4089	0.2675
LP16-2	pLARmEB	TM11620	TM11604_TM11618_TM11619_TM11620_TM11628_TM11629_TM11631	A05	32077816	33400112	32783353	0.0009	4.9537	5.748	0.0756
LP16-2	pLARmEB	TM11740	TM11695_TM11705_TM11726_TM11728_TM11740	A05	34420081	35799312	35299312	0.0043	8.6333	9.5411	0.2498
LP16-2	pLARmEB	TM13216	TM13216_TM13226	A05	85239282	86381414	85739282	-0.0003	19.233	Inf	0.0094
LP16-2	pLARmEB	TM13292	TM13292	A05	86287102	87287102	86787102	-0.0003	3.0914	3.7925	0.0015
LP16-2	pLARmEB	TM18483	TM18483	A06	101683321	102683321	102183321	-4.87e-05	6.6547	7.5089	6.2048e-05
LP16-2	pLARmEB	TM18525	TM18521_TM18525	A07	828962	1866501	1366501	0.0026	7.6546	8.5375	0.1954
LP16-2	pLARmEB	TM19288	TM19288	A07	14995849	15995849	15495849	0.0005	4.8483	5.6382	0.0115
LP16-2	pLARmEB	TM19408	TM19408	A07	19144706	20144706	19644706	-0.0026	3.4072	4.1272	0.211
LP16-2	pLARmEB	TM21505	TM21493_TM21494_TM21505	A07	73967811	75161474	74661474	0.0008	3.0441	3.7422	0.0473
LP16-2	pLARmEB	TM21842	TM21842	A08	1463571	2463571	1963571	-0.0006	7.5224	8.4017	0.0376
LP16-2	pLARmEB	TM28887	TM28887	A08	76895773	77895773	77395773	0.0008	13.315	14.3111	0.0643
LP16-2	pLARmEB	TM29029	TM29029	A08	81893440	82893440	82393440	0.0013	3.2464	3.957	0.1442
LP16-2	pLARmEB	TM32705	TM32705	A09	51423851	52423851	51923851	-0.001	4.1835	4.944	0.0962
LP16-2	pLARmEB	TM36634	TM36634_TM36639	A10	95697852	96726032	96197852	-0.0004	4.195	4.956	0.0082
LP16-2	pLARmEB	TM36751	TM36751	A10	97529003	98529003	98029003	0.0022	3.569	4.2981	0.3042
LP16-2	pLARmEB	TM36876	TM36876_TM36880_TM36885	A10	99596949	100696471	100096949	-0.0016	9.2549	10.1771	0.0468
LP16-2	pLARmEB	TM37264	TM37264	A11	7450701	8450701	7950701	-0.0006	3.9631	4.7128	0.0278
LP16-2	pLARmEB	TM38780	TM38780	A11	62609919	63609919	63109919	-0.0005	4.7167	5.5011	0.0102
LP16-2	pLARmEB	TM39591	TM39591	A11	88181159	89181159	88681159	-0.0004	3.5943	4.3248	0.0112
LP16-2	pLARmEB	TM40012	TM40012_TM40030_TM40043_TM40050_TM40054_TM40069	A12	302614	2043324	802614	-0.0006	8.1628	9.059	0.016
LP16-2	pLARmEB	TM40069	TM40012_TM40030_TM40043_TM40050_TM40054_TM40069	A12	302614	2043324	1543324	0.0023	6.9502	7.8133	0.1104
LP16-2	pLARmEB	TM42970	TM42970_TM42971	A12	82930373	83938942	83430373	-0.004	9.1	10.0187	1.4535
LP16-2	pLARmEB	TM43041	TM43041	A12	84677337	85677337	85177337	8.406e-05	8.4214	9.324	0.0001
LP16-2	pLARmEB	TM43052	TM43052	A12	85085994	86085994	85585994	0.0009	3.4824	4.2067	0.074
LP16-2	pLARmEB	TM43196	TM43196	A13	466113	1466113	966113	0.0008	4.3078	5.0741	0.0593
LP16-2	pLARmEB	TM47172	TM47172	A13	69443290	70443290	69943290	-0.0004	5.9047	6.7345	0.0117
LP16-2	pLARmEB	TM47179	TM47179_TM47180_TM47183	A13	69793680	71007948	70293680	-0.0005	8.6445	9.5525	0.0178
LP16-2	pLARmEB	TM47886	TM47886	D01	1990705	2990705	2490705	-0.0006	3.5394	4.2668	0.0301
LP16-2	pLARmEB	TM48044	TM48044	D01	4648517	5648517	5148517	-0.0001	3.2073	3.9155	0.0021
LP16-2	pLARmEB	TM50792	TM50792	D02	9596573	10596573	10096573	0.003	5.2712	6.078	0.5827
LP16-2	pLARmEB	TM53320	TM53311_TM53314_TM53320	D02	65229829	66404953	65904953	-0.0003	9.4304	10.3565	0.0099
LP16-2	pLARmEB	TM53427	TM53427	D03	1193622	2193622	1693622	-0.0032	7.9753	8.8667	0.2606
LP16-2	pLARmEB	TM53654	TM53654	D03	5404291	6404291	5904291	-0.0019	19.3215	Inf	0.1533
LP16-2	pLARmEB	TM55598	TM55598	D04	3413469	4413469	3913469	0.0001	11.9944	12.9705	0.0005
LP16-2	pLARmEB	TM55934	TM55934	D04	11019014	12019014	11519014	-0.0012	5.1869	5.9904	0.0587
LP16-2	pLARmEB	TM56234	TM56221_TM56234	D04	39893473	41085916	40585916	0.0049	6.5778	7.4296	2.229
LP16-2	pLARmEB	TM56532	TM56532_TM56533_TM56534	D04	47662105	48677501	48162105	0.0006	9.1991	10.12	0.0365
LP16-2	pLARmEB	TM56533	TM56532_TM56533_TM56534	D04	47662105	48677501	48170356	0.001	6.7763	7.6342	0.0851
LP16-2	pLARmEB	TM56628	TM56624_TM56628_TM56644	D04	49343511	50480613	49871040	0.0079	6.7561	7.6134	3.5766
LP16-2	pLARmEB	TM56992	TM56979_TM56992_TM57000	D05	6048669	7280378	6644860	0.0009	3.2621	3.9736	0.0396
LP16-2	pLARmEB	TM58618	TM58618_TM58619_TM58623	D05	55502770	56578768	56002770	0.0024	3.0194	3.7159	0.5234
LP16-2	pLARmEB	TM58801	TM58795_TM58801	D05	59474581	60509734	60009734	0.0016	5.6865	6.5086	0.224
LP16-2	pLARmEB	TM59049	TM59048_TM59049	D06	1600455	2624769	2124769	0.0008	6.4725	7.321	0.0291
LP16-2	pLARmEB	TM59065	TM59065	D06	1832677	2832677	2332677	-0.0004	4.5155	5.2912	0.0156
LP16-2	pLARmEB	TM59904	TM59904	D06	21569977	22569977	22069977	-0.0006	4.6492	5.4307	0.0245
LP16-2	pLARmEB	TM63184	TM63184	D07	810789	1810789	1310789	-0.0006	9.5181	10.4461	0.0353
LP16-2	pLARmEB	TM63194	TM63194	D07	1093854	2093854	1593854	0.0002	7.1474	8.0162	0.0019
LP16-2	pLARmEB	TM66913	TM66913	D08	967215	1967215	1467215	-0.0006	5.8078	6.6342	0.0311
LP16-2	pLARmEB	TM67473	TM67473	D08	8473510	9473510	8973510	-0.0007	12.8021	13.7932	0.0197
LP16-2	pLARmEB	TM69027	TM69027	D08	47099542	48099542	47599542	-0.0022	16.0425	Inf	0.4369
LP16-2	pLARmEB	TM69482	TM69482_TM69488	D08	58374866	59421452	58874866	0.0013	14.7811	15.9546	0.1537
LP16-2	pLARmEB	TM69498	TM69498_TM69503_TM69505_TM69517	D08	58667890	59856847	59167890	0.0004	3.4482	4.1705	0.0035
LP16-2	pLARmEB	TM69503	TM69498_TM69503_TM69505_TM69517	D08	58667890	59856847	59246518	-0.0019	13.0004	13.9955	0.1252
LP16-2	pLARmEB	TM69759	TM69759	D08	61571145	62571145	62071145	0.0008	3.019	3.7155	0.0287
LP16-2	pLARmEB	TM70420	TM70420_TM70423	D09	7060657	8171442	7560657	0.0011	8.4599	9.3635	0.0491
LP16-2	pLARmEB	TM72330	TM72330	D09	39401937	40401937	39901937	0.0009	12.4636	13.4481	0.0551
LP16-2	pLARmEB	TM72939	TM72939	D09	48786897	49786897	49286897	0.0005	4.7316	5.5166	0.0229
LP16-2	pLARmEB	TM73204	TM73204	D10	2147840	3147840	2647840	0.0002	9.0434	9.9608	0.001
LP16-2	pLARmEB	TM73294	TM73294	D10	3280467	4280467	3780467	-0.0012	6.8545	7.7147	0.0147
LP16-2	pLARmEB	TM74877	TM74864_TM74872_TM74873_TM74877_TM74893	D10	55659402	56891635	56296028	0.0006	5.2547	6.0608	0.0232
LP16-2	pLARmEB	TM75461	TM75461	D11	5160440	6160440	5660440	0.0004	11.9184	12.8931	0.0123
LP16-2	pLARmEB	TM75843	TM75843	D11	13484507	14484507	13984507	9.515e-05	8.0099	8.9022	0.0004
LP16-2	pLARmEB	TM76876	TM76876_TM76878	D11	54690520	55703588	55190520	-0.0019	3.3319	4.0475	0.2937
LP16-2	pLARmEB	TM77721	TM77721_TM77724	D12	6763519	7856856	7263519	0.0006	3.8387	4.5821	0.0081
LP16-2	pLARmEB	TM79857	TM79857	D12	56160184	57160184	56660184	-0.0002	7.8954	8.7847	0.0008
LP16-2	pLARmEB	TM79948	TM79948	D12	57766725	58766725	58266725	0.0003	6.1025	6.939	0.0073
LP16-2	pLARmEB	TM80171	TM80159_TM80160_TM80162_TM80165_TM80171_TM80180	D13	2090468	3399108	2760780	0.0012	11.1396	12.1004	0.108
LP16-2	pLARmEB	TM80201	TM80201_TM80220_TM80222	D13	2997533	4212736	3497533	-0.0003	4.8873	5.6788	0.0026
LP16-2	pLARmEB	TM80416	TM80412_TM80414_TM80416	D13	7043336	8287560	7787560	0.0047	3.4847	4.2091	2.0771
LP16-2	pLARmEB	TM81844	TM81839_TM81844_TM81850_TM81851_TM81865_TM81874	D13	52777282	54122365	53341840	-0.0013	4.812	5.6004	0.1003
LP16-2	pLARmEB	TM81850	TM81839_TM81844_TM81850_TM81851_TM81865_TM81874	D13	52777282	54122365	53384630	-0.0015	6.3878	7.2336	0.149
LP16-2	pKWmEB	TM11705	TM11695_TM11705_TM11726_TM11728_TM11740	A05	34420081	35799312	35036123	-0.006	4.5011	5.2761	5.4181
LP16-2	pKWmEB	TM56628	TM56624_TM56628_TM56644	D04	49343511	50480613	49871040	0.0128	5.2264	6.0315	12.9043
LP16-2	pKWmEB	TM59420	TM59411_TM59417_TM59420	D06	8150745	9228975	8728975	-0.0124	3.1181	3.8208	11.7301
LP16-2	pKWmEB	TM72461	TM72461	D09	41141711	42141711	41641711	-0.0088	3.4959	4.2209	11.3073
LP16-2	pKWmEB	TM79306	TM79306	D12	47908372	48908372	48408372	-0.0066	3.6355	4.3682	4.7761
LP16-2	ISIS EM-BLASSO	TM1147	TM1147	A01	23681826	24681826	24181826	-0.0026	3.0295	3.7266	0.5254
LP16-2	ISIS EM-BLASSO	TM3181	TM3181_TM3182	A01	88385873	89509700	88885873	0.0094	3.5785	4.3081	2.6622
LP16-2	ISIS EM-BLASSO	TM37264	TM37264	A11	7450701	8450701	7950701	-0.005	3.511	4.2369	2.2239
LP16-2	ISIS EM-BLASSO	TM40284	TM40268_TM40284	A12	5636007	6804599	6304599	-0.0057	4.0897	4.8457	2.8373
LP16-2	ISIS EM-BLASSO	TM56624	TM56624_TM56628_TM56644	D04	49343511	50480613	49843511	0.0051	3.3981	4.1176	1.5983
LP17-1	mrMLM	TM11329	TM11318_TM11329_TM11331	A05	27795887	28952309	28357176	-0.0086	3.131	3.83453	2.839
LP17-1	mrMLM	TM23988	TM23988	A08	32419552	33419552	32919552	0.0554	5.3989	6.21051	49.7139
LP17-1	mrMLM	TM74749	TM74747_TM74748_TM74749_TM74751	D10	52796308	53819487	53302280	-0.0131	3.257	3.9682	2.5711
LP17-1	mrMLM	TM80171	TM80159_TM80160_TM80162_TM80165_TM80171_TM80180	D13	2090468	3399108	2760780	0.0091	3.4457	4.16789	2.635
LP17-1	FASTmrMLM	TM25043	TM25043	A08	40989890	41989890	41489890	-0.0095	3.0554	3.7542	2.8244
LP17-1	FASTmrMLM	TM29927	TM29927	A08	101852318	102852318	102352318	-0.0026	3.2685	3.9804	0.1006
LP17-1	FASTmrMLM	TM40069	TM40012_TM40030_TM40043_TM40050_TM40054_TM40069	A12	302614	2043324	1543324	0.0042	6.2913	7.134	0.2896
LP17-1	FASTmrEMMA	TM49426	TM49426	D01	44660371	45660371	45160371	-0.0217	5.1172	5.9179	3.7941
LP17-1	FASTmrEMMA	TM50039	TM50039_TM50040_TM50043	D01	56702872	57800770	57202872	0.0161	3.4478	4.1701	3.8342
LP17-1	pLARmEB	TM11685	TM11685	A05	33673922	34673922	34173922	-0.0021	3.9551	4.7044	0.2978
LP17-1	pLARmEB	TM13710	TM13710	A06	2824969	3824969	3324969	0.0015	3.0931	3.7943	0.1344
LP17-1	pLARmEB	TM18841	TM18841	A07	8836378	9836378	9336378	0.0007	3.3383	4.0543	0.0265
LP17-1	pLARmEB	TM29029	TM29029	A08	81893440	82893440	82393440	0.0071	3.0881	3.789	3.2122
LP17-1	pLARmEB	TM29927	TM29927	A08	101852318	102852318	102352318	-0.0006	3.213	3.9216	0.0042
LP17-1	pLARmEB	TM36876	TM36876_TM36880_TM36885	A10	99596949	100696471	100096949	-0.0338	6.2345	7.0753	14.3853
LP17-1	pLARmEB	TM49426	TM49426	D01	44660371	45660371	45160371	-0.0103	4.1011	4.8576	3.068
LP17-1	pLARmEB	TM50039	TM50039_TM50040_TM50043	D01	56702872	57800770	57202872	0.0077	5.1757	5.9788	3.1881
LP17-1	pLARmEB	TM54702	TM54702	D03	29272914	30272914	29772914	-0.0076	5.9522	6.7836	3.0982
LP17-1	pLARmEB	TM63220	TM63220	D07	1501662	2501662	2001662	0.0031	3.8574	4.6018	0.5182
LP17-1	pLARmEB	TM67223	TM67223	D08	5193850	6193850	5693850	0.0361	3.0847	3.7853	5.3142
LP17-1	pLARmEB	TM69814	TM69813_TM69814	D08	63126263	64153155	63653155	-0.0203	3.3864	4.1052	2.3286
LP17-1	pLARmEB	TM74747	TM74747_TM74748_TM74749_TM74751	D10	52796308	53819487	53296308	0.0193	3.5981	4.3288	8.4001
LP17-1	pKWmEB	TM49426	TM49426	D01	44660371	45660371	45160371	-0.0125	5.1365	5.9381	5.9867
LP17-1	pKWmEB	TM74747	TM74747_TM74748_TM74749_TM74751	D10	52796308	53819487	53296308	0.0121	3.1558	3.8609	14.2748
LP17-1	ISIS EM-BLASSO	TM57712	TM57712_TM57713	D05	26008939	27011453	26508939	0.0056	5.5076	6.3232	1.1632
LP17-1	ISIS EM-BLASSO	TM66566	TM66566_TM66572	D07	49402490	50493298	49902490	0.0058	3.6471	4.3804	1.6933
LP17-1	ISIS EM-BLASSO	TM67223	TM67223	D08	5193850	6193850	5693850	0.0401	5.2573	6.0635	6.9879
LP17-1	ISIS EM-BLASSO	TM69814	TM69813_TM69814	D08	63126263	64153155	63653155	-0.0218	3.0341	3.7315	2.8848
LP17-2	mrMLM	TM5905	TM5905	A03	1728745	2728745	2228745	0.0084	3.7779	4.51817	6.5347
LP17-2	mrMLM	TM29775	TM29775	A08	98543408	99543408	99043408	0.0056	3.0158	3.71207	2.7933
LP17-2	FASTmrMLM	TM62914	TM62914	D06	58404204	59404204	58904204	5.0609e-05	3.3767	4.0949	7.1317e-05
LP17-2	FASTmrEMMA	TM37355	TM37355	A11	11710731	12710731	12210731	-0.0056	3.1272	3.8305	0.6559
LP17-2	pLARmEB	TM5905	TM5905	A03	1728745	2728745	2228745	0.0057	6.1543	6.9925	2.6686
LP17-2	pLARmEB	TM10612	TM10611_TM10612_TM10619	A05	12316384	13382439	12828701	0.0017	5.3076	6.1158	0.1622
LP17-2	pLARmEB	TM11628	TM11604_TM11618_TM11619_TM11620_TM11628_TM11629_TM11631	A05	32077816	33400112	32828410	-0.0037	4.4391	5.2114	1.0746
LP17-2	pLARmEB	TM33806	TM33795_TM33806	A10	37840	1090331	590331	0.0067	3.7155	4.4525	2.0834
LP17-2	pLARmEB	TM37355	TM37355	A11	11710731	12710731	12210731	-0.0044	4.2314	4.9941	1.4935
LP17-2	pLARmEB	TM48068	TM48068_TM48070	D01	4913817	6063241	5413817	0.0034	4.4868	5.2612	0.9376
LP17-2	pLARmEB	TM56234	TM56221_TM56234	D04	39893473	41085916	40585916	0.0012	6.8498	7.7099	0.1237
LP17-2	pLARmEB	TM56492	TM56492_TM56499_TM56500	D04	46870404	47961105	47370404	0.011	6.9491	7.8121	8.6392
LP17-2	pLARmEB	TM58150	TM58150	D05	36744208	37744208	37244208	0.0012	3.3197	4.0346	0.0486
LP17-2	pLARmEB	TM63262	TM63262	D07	2454571	3454571	2954571	0.0047	6.3372	7.1814	1.0784
LP17-2	pLARmEB	TM64302	TM64302	D07	20700450	21700450	21200450	0.0008	4.1481	4.9069	0.0477
LP17-2	pKWmEB	TM1559	TM1559	A01	62887811	63887811	63387811	0.0058	3.4098	4.1299	6.0981
LP17-2	pKWmEB	TM5905	TM5905	A03	1728745	2728745	2228745	0.0034	3.3262	4.0415	5.6174
LP17-2	ISIS EM-BLASSO	TM37355	TM37355	A11	11710731	12710731	12210731	-0.0062	7.5715	8.4522	3.3597
LP16-3	mrMLM	TM10349	TM10349	A05	5995325	6995325	6495325	0.0111	5.2352	6.04059	5.7702
LP16-3	mrMLM	TM35365	TM35362_TM35365_TM35366	A10	65024917	66186233	65679765	0.0119	3.7728	4.51281	5.0719
LP16-3	mrMLM	TM37264	TM37264	A11	7450701	8450701	7950701	-0.01	5.4982	6.3135	6.6446
LP16-3	mrMLM	TM74893	TM74864_TM74872_TM74873_TM74877_TM74893	D10	55659402	56891635	56391635	-0.0083	3.0956	3.79692	3.6553
LP16-3	FASTmrMLM	TM11629	TM11604_TM11618_TM11619_TM11620_TM11628_TM11629_TM11631	A05	32077816	33400112	32833996	-0.0056	5.1111	5.9117	1.8287
LP16-3	FASTmrMLM	TM14365	TM14365	A06	24360023	25360023	24860023	0.009	3.9253	4.6731	0.9635
LP16-3	FASTmrMLM	TM28987	TM28987	A08	79042394	80042394	79542394	0.0043	4.7455	5.5311	1.0788
LP16-3	FASTmrMLM	TM37264	TM37264	A11	7450701	8450701	7950701	-0.0072	3.8669	4.6118	2.9173
LP16-3	FASTmrMLM	TM53470	TM53464_TM53470	D03	1510083	2545335	2045335	-0.0286	4.5096	5.285	15.0756
LP16-3	FASTmrMLM	TM59420	TM59411_TM59417_TM59420	D06	8150745	9228975	8728975	-0.0178	4.0864	4.8422	12.4703
LP16-3	FASTmrMLM	TM78492	TM78492	D12	30559977	31559977	31059977	0.005	3.8403	4.5838	1.127
LP16-3	FASTmrEMMA	TM59411	TM59411_TM59417_TM59420	D06	8150745	9228975	8650745	0.0179	3.6027	4.3336	3.6852
LP16-3	pLARmEB	TM99	TM91_TM99	A01	1887042	2977994	2477994	-0.0011	8.7244	9.6343	0.0271
LP16-3	pLARmEB	TM328	TM328	A01	5834373	6834373	6334373	-0.0008	5.6086	6.4279	0.0225
LP16-3	pLARmEB	TM3628	TM3626_TM3628	A01	98022877	99034245	98534245	-0.0015	4.6297	5.4104	0.146
LP16-3	pLARmEB	TM3728	TM3728	A02	0	995771	495771	-0.0003	16.0616	Inf	0.0018
LP16-3	pLARmEB	TM4107	TM4107	A02	6836716	7836716	7336716	-0.0003	6.9838	7.8478	0.0027
LP16-3	pLARmEB	TM4543	TM4543	A02	39106194	40106194	39606194	-0.0007	3.0172	3.7136	0.0184
LP16-3	pLARmEB	TM5515	TM5513_TM5515	A02	77539833	78640867	78140867	-0.008	29.9586	Inf	0.9876
LP16-3	pLARmEB	TM5662	TM5646_TM5649_TM5662	A02	79997099	81187074	80687074	-0.0002	9.9135	10.85	0.0012
LP16-3	pLARmEB	TM5728	TM5728	A02	81750074	82750074	82250074	0.0018	5.41	6.222	0.0588
LP16-3	pLARmEB	TM8040	TM8040_TM8043	A03	92320417	93514730	92820417	-0.0003	4.4041	5.1748	0.004
LP16-3	pLARmEB	TM8043	TM8040_TM8043	A03	92320417	93514730	93014730	-0.0013	11.149	12.11	0.0764
LP16-3	pLARmEB	TM9043	TM9043	A04	8542861	9542861	9042861	-0.0009	7.5197	8.3989	0.0115
LP16-3	pLARmEB	TM9063	TM9063_TM9066	A04	9583826	10710126	10083826	-0.0007	8.3364	9.2369	0.0056
LP16-3	pLARmEB	TM9488	TM9488	A04	40199709	41199709	40699709	-0.0011	3.6265	4.3587	0.0649
LP16-3	pLARmEB	TM11331	TM11318_TM11329_TM11331	A05	27795887	28952309	28452309	-0.0013	3.7214	4.4587	0.1126
LP16-3	pLARmEB	TM13695	TM13695	A06	1912708	2912708	2412708	0.0024	13.045	14.0408	0.1873
LP16-3	pLARmEB	TM13774	TM13774	A06	3981268	4981268	4481268	-0.0004	5.3067	6.1148	0.0112
LP16-3	pLARmEB	TM14120	TM14120	A06	17458486	18458486	17958486	-0.0006	9.6776	10.6091	0.0141
LP16-3	pLARmEB	TM14365	TM14365	A06	24360023	25360023	24860023	0.0018	7.2268	8.0979	0.042
LP16-3	pLARmEB	TM14564	TM14564	A06	34781486	35781486	35281486	-0.0009	6.8119	7.6708	0.0365
LP16-3	pLARmEB	TM17133	TM17133	A06	87692918	88692918	88192918	-0.001	7.0378	7.9034	0.0244
LP16-3	pLARmEB	TM18316	TM18316	A06	99674630	100674630	100174630	-7.5061e-05	7.2061	8.0766	0.0004
LP16-3	pLARmEB	TM18467	TM18467	A06	101361383	102361383	101861383	0.0004	15.3755	Inf	0.002
LP16-3	pLARmEB	TM19497	TM19497_TM19499	A07	20495447	21502490	20995447	0.0016	7.8321	8.7197	0.0735
LP16-3	pLARmEB	TM19499	TM19497_TM19499	A07	20495447	21502490	21002490	0.0006	7.2614	8.1335	0.0064
LP16-3	pLARmEB	TM21134	TM21119_TM21134	A07	70056827	71176245	70676245	0.0027	8.4154	9.3179	0.1276
LP16-3	pLARmEB	TM21685	TM21685_TM21693	A07	76599421	77634639	77099421	0.0003	14.0285	15.0515	0.0025
LP16-3	pLARmEB	TM21718	TM21718	A07	76970838	77970838	77470838	-0.0002	5.029	5.8263	0.0024
LP16-3	pLARmEB	TM29158	TM29158	A08	84586999	85586999	85086999	0.0018	7.6075	8.4891	0.2023
LP16-3	pLARmEB	TM32705	TM32705	A09	51423851	52423851	51923851	-0.0006	39.2271	Inf	0.02
LP16-3	pLARmEB	TM33029	TM33029	A09	57971485	58971485	58471485	0.0025	26.3282	Inf	0.3555
LP16-3	pLARmEB	TM33126	TM33126	A09	62467904	63467904	62967904	-0.0004	26.0781	Inf	0.0107
LP16-3	pLARmEB	TM33817	TM33817	A10	455067	1455067	955067	0.0004	16.2742	Inf	0.0101
LP16-3	pLARmEB	TM33830	TM33830_TM33837	A10	1180168	2372780	1680168	-0.0008	3.0654	3.7648	0.0428
LP16-3	pLARmEB	TM33866	TM33864_TM33866_TM33870	A10	2245139	3441185	2856796	-0.0002	8.1068	9.0015	0.0004
LP16-3	pLARmEB	TM33870	TM33864_TM33866_TM33870	A10	2245139	3441185	2941185	-0.0013	10.3612	11.3069	0.0668
LP16-3	pLARmEB	TM34276	TM34276	A10	19895405	20895405	20395405	0.0021	13.5953	14.5929	0.0685
LP16-3	pLARmEB	TM34341	TM34341	A10	20845288	21845288	21345288	-0.0004	9.0806	9.9988	0.0114
LP16-3	pLARmEB	TM35365	TM35362_TM35365_TM35366	A10	65024917	66186233	65679765	0.0061	7.3143	8.1878	1.3029
LP16-3	pLARmEB	TM36426	TM36426	A10	92647308	93647308	93147308	-0.001	7.9135	8.8033	0.042
LP16-3	pLARmEB	TM36876	TM36876_TM36880_TM36885	A10	99596949	100696471	100096949	-0.0152	8.5898	9.4965	2.9413
LP16-3	pLARmEB	TM37126	TM37126	A11	3072044	4072044	3572044	-0.0003	7.2511	8.1229	0.0019
LP16-3	pLARmEB	TM37264	TM37264	A11	7450701	8450701	7950701	-0.0016	18.1434	Inf	0.1545
LP16-3	pLARmEB	TM38084	TM38084	A11	24894501	25894501	25394501	-0.0022	4.4813	5.2555	0.052
LP16-3	pLARmEB	TM38171	TM38171	A11	36428550	37428550	36928550	0.0013	53.8181	Inf	0.0366
LP16-3	pLARmEB	TM38172	TM38172	A11	36793735	37793735	37293735	-0.0014	39.5374	Inf	0.1142
LP16-3	pLARmEB	TM39780	TM39780	A11	90406133	91406133	90906133	-0.0002	7.7421	8.6273	0.0019
LP16-3	pLARmEB	TM40043	TM40012_TM40030_TM40043_TM40050_TM40054_TM40069	A12	302614	2043324	1154995	0.0005	5.1	5.9001	0.006
LP16-3	pLARmEB	TM40195	TM40159_TM40175_TM40195	A12	2566187	3910918	3410918	0.0012	6.4146	7.2612	0.0212
LP16-3	pLARmEB	TM42627	TM42627	A12	74416613	75416613	74916613	-0.0018	6.8336	7.6932	0.2043
LP16-3	pLARmEB	TM42707	TM42707	A12	76609483	77609483	77109483	0.0022	38.6442	Inf	0.3162
LP16-3	pLARmEB	TM42971	TM42970_TM42971	A12	82930373	83938942	83438942	-0.0013	3.0417	3.7396	0.1053
LP16-3	pLARmEB	TM43052	TM43052	A12	85085994	86085994	85585994	0.0011	13.9373	14.9546	0.0792
LP16-3	pLARmEB	TM43196	TM43196	A13	466113	1466113	966113	0.0003	4.3745	5.1439	0.0064
LP16-3	pLARmEB	TM47795	TM47795	D01	438679	1438679	938679	0.0008	7.9022	8.7917	0.0292
LP16-3	pLARmEB	TM48166	TM48166	D01	6263937	7263937	6763937	-0.0009	13.8739	14.8754	0.0316
LP16-3	pLARmEB	TM48310	TM48309_TM48310	D01	8882597	9885569	9385569	0.0021	5.6729	6.4945	0.0808
LP16-3	pLARmEB	TM50647	TM50647	D02	5893732	6893732	6393732	-0.0017	8.8987	9.8127	0.16
LP16-3	pLARmEB	TM52041	TM52041_TM52044	D02	48905207	50012158	49405207	-0.0044	7.1569	8.026	0.1719
LP16-3	pLARmEB	TM53071	TM53071	D02	62037969	63037969	62537969	-0.0004	5.0406	5.8384	0.0057
LP16-3	pLARmEB	TM53374	TM53374	D03	204158	1204158	704158	0.0006	5.5412	6.3581	0.0168
LP16-3	pLARmEB	TM53470	TM53464_TM53470	D03	1510083	2545335	2045335	-0.0021	6.2431	7.0842	0.0901
LP16-3	pLARmEB	TM53613	TM53613	D03	3750153	4750153	4250153	0.0016	11.6139	12.5833	0.0685
LP16-3	pLARmEB	TM54732	TM54732	D03	30218548	31218548	30718548	-0.0019	3.7296	4.4673	0.045
LP16-3	pLARmEB	TM54954	TM54954_TM54972	D03	37168070	38315304	37668070	-0.0005	41.1037	Inf	0.0047
LP16-3	pLARmEB	TM55012	TM55012	D03	38171109	39171109	38671109	0.0003	4.8733	5.6643	0.0019
LP16-3	pLARmEB	TM55216	TM55206_TM55216_TM55217_TM55218_TM55223	D03	42299450	43529568	42969311	0.0065	3.0917	3.7928	2.4262
LP16-3	pLARmEB	TM55218	TM55206_TM55216_TM55217_TM55218_TM55223	D03	42299450	43529568	42999329	0.0005	11.0794	12.039	0.0117
LP16-3	pLARmEB	TM55259	TM55259_TM55265	D03	43228082	44271208	43728082	0.0003	21.004	Inf	0.0036
LP16-3	pLARmEB	TM55533	TM55533	D04	3024501	4024501	3524501	0.0004	26.3373	Inf	0.0041
LP16-3	pLARmEB	TM56234	TM56221_TM56234	D04	39893473	41085916	40585916	0.0014	44.8448	Inf	0.1235
LP16-3	pLARmEB	TM56550	TM56550_TM56558	D04	48103853	49198364	48603853	0.0004	10.9993	11.9574	0.0091
LP16-3	pLARmEB	TM56852	TM56851_TM56852	D05	3723958	4797444	4297444	0.0001	6.2532	7.0946	0.0006
LP16-3	pLARmEB	TM56979	TM56979_TM56992_TM57000	D05	6048669	7280378	6548669	-0.0004	8.7337	9.6438	0.0035
LP16-3	pLARmEB	TM57115	TM57115	D05	8808672	9808672	9308672	0.0016	3.2844	3.9972	0.0716
LP16-3	pLARmEB	TM57423	TM57423_TM57432	D05	18573529	19709507	19073529	0.0003	22.2879	Inf	0.0011
LP16-3	pLARmEB	TM57480	TM57480_TM57483	D05	19486186	20522130	19986186	-0.0004	13.9956	15.0003	0.0081
LP16-3	pLARmEB	TM57713	TM57712_TM57713	D05	26008939	27011453	26511453	0.0003	3.5014	4.2267	0.0023
LP16-3	pLARmEB	TM57840	TM57840	D05	29521662	30521662	30021662	0.0102	21.7304	Inf	1.7861
LP16-3	pLARmEB	TM58335	TM58335	D05	49619189	50619189	50119189	0.0006	9.9471	10.8843	0.0158
LP16-3	pLARmEB	TM62952	TM62952	D06	59900869	60900869	60400869	-0.0008	3.6126	4.3441	0.0216
LP16-3	pLARmEB	TM63028	TM63028	D06	60956736	61956736	61456736	0.0005	3.0294	3.7265	0.0144
LP16-3	pLARmEB	TM63035	TM63032_TM63035	D06	61329622	62528883	62028883	-0.0005	19.3247	Inf	0.0138
LP16-3	pLARmEB	TM63300	TM63300_TM63306_TM63308	D07	2901093	3936525	3401093	0.0011	10.0789	11.0188	0.0181
LP16-3	pLARmEB	TM63362	TM63362	D07	4397706	5397706	4897706	-0.0009	5.9675	6.7994	0.0528
LP16-3	pLARmEB	TM63969	TM63969	D07	15801594	16801594	16301594	-2.001e-05	8.4236	9.3263	1.6834e-05
LP16-3	pLARmEB	TM64041	TM64033_TM64041_TM64043_TM64057_TM64061	D07	17945478	19273363	18551697	0.0004	24.5551	Inf	0.0111
LP16-3	pLARmEB	TM64057	TM64033_TM64041_TM64043_TM64057_TM64061	D07	17945478	19273363	18729959	0.0011	5.7046	6.5274	0.0848
LP16-3	pLARmEB	TM66973	TM66960_TM66973_TM66981_TM66984	D08	1682088	2914354	2313842	-0.0003	5.8592	6.6874	0.0058
LP16-3	pLARmEB	TM67201	TM67201	D08	4941675	5941675	5441675	0.0008	31.3587	Inf	0.0339
LP16-3	pLARmEB	TM67292	TM67282_TM67284_TM67292	D08	6625530	7786657	7286657	-0.0011	15.0502	15.9546	0.0869
LP16-3	pLARmEB	TM69503	TM69498_TM69503_TM69505_TM69517	D08	58667890	59856847	59246518	-0.0025	3.5919	4.3222	0.1505
LP16-3	pLARmEB	TM69517	TM69498_TM69503_TM69505_TM69517	D08	58667890	59856847	59356847	-2.877e-05	3.8861	4.6319	5.4494e-05
LP16-3	pLARmEB	TM72105	TM72105	D09	35603559	36603559	36103559	-0.0008	3.0661	3.7656	0.0292
LP16-3	pLARmEB	TM72227	TM72221_TM72227	D09	38130436	39189341	38689341	-0.0023	4.5684	5.3464	0.1229
LP16-3	pLARmEB	TM72911	TM72911	D09	48098570	49098570	48598570	-0.0003	5.6822	6.5042	0.0027
LP16-3	pLARmEB	TM74872	TM74864_TM74872_TM74873_TM74877_TM74893	D10	55659402	56891635	56245025	-0.0025	5.5844	6.4029	0.0936
LP16-3	pLARmEB	TM74873	TM74864_TM74872_TM74873_TM74877_TM74893	D10	55659402	56891635	56257129	-0.0002	5.436	6.249	0.0008
LP16-3	pLARmEB	TM75236	TM75236	D10	62466915	63466915	62966915	0.0008	10.5251	11.474	0.0179
LP16-3	pLARmEB	TM75284	TM75284	D11	812557	1812557	1312557	0.0007	11.8259	12.7993	0.0063
LP16-3	pLARmEB	TM75889	TM75886_TM75889	D11	14987787	16041137	15541137	-7.4456e-05	6.8274	7.6868	0.0004
LP16-3	pLARmEB	TM75981	TM75981	D11	16336266	17336266	16836266	-0.0003	7.1437	8.0124	0.0041
LP16-3	pLARmEB	TM76878	TM76876_TM76878	D11	54690520	55703588	55203588	-0.0005	3.9394	4.6879	0.0114
LP16-3	pLARmEB	TM77216	TM77216	D11	65100159	66100159	65600159	-4.3904e-05	4.7569	5.543	0.0001
LP16-3	pLARmEB	TM77321	TM77321	D12	940130	1940130	1440130	0.0002	7.8786	8.7674	0.0012
LP16-3	pLARmEB	TM77641	TM77635_TM77641	D12	5107217	6136802	5636802	0.0008	5.4324	6.2453	0.0084
LP16-3	pLARmEB	TM78907	TM78907	D12	41302281	42302281	41802281	-0.0013	3.2096	3.9179	0.0753
LP16-3	pLARmEB	TM80159	TM80159_TM80160_TM80162_TM80165_TM80171_TM80180	D13	2090468	3399108	2590468	0.0006	6.6883	7.5435	0.019
LP16-3	pLARmEB	TM80162	TM80159_TM80160_TM80162_TM80165_TM80171_TM80180	D13	2090468	3399108	2608592	-0.0004	4.995	5.7909	0.0094
LP16-3	pLARmEB	TM80222	TM80201_TM80220_TM80222	D13	2997533	4212736	3712736	0.0023	10.4585	11.4061	0.3259
LP16-3	pLARmEB	TM81851	TM81839_TM81844_TM81850_TM81851_TM81865_TM81874	D13	52777282	54122365	53406577	-0.001	17.3004	Inf	0.044
LP16-3	pLARmEB	TM81865	TM81839_TM81844_TM81850_TM81851_TM81865_TM81874	D13	52777282	54122365	53550728	-0.0007	3.1397	3.8438	0.0135
LP16-3	pLARmEB	TM81874	TM81839_TM81844_TM81850_TM81851_TM81865_TM81874	D13	52777282	54122365	53622365	0.0009	29.8794	Inf	0.0149
LP16-3	pLARmEB	TM82156	TM82156_TM82168	D13	58492627	59589811	58992627	0.0051	23.8084	Inf	0.5547
LP16-3	pKWmEB	TM11629	TM11604_TM11618_TM11619_TM11620_TM11628_TM11629_TM11631	A05	32077816	33400112	32833996	-0.0038	3.5345	4.2617	2.2438
LP16-3	pKWmEB	TM36876	TM36876_TM36880_TM36885	A10	99596949	100696471	100096949	-0.0336	3.7326	4.4705	15.3112
LP16-3	pKWmEB	TM37264	TM37264	A11	7450701	8450701	7950701	-0.006	5.8677	6.6962	3.3799
LP16-3	pKWmEB	TM63035	TM63032_TM63035	D06	61329622	62528883	62028883	-0.0013	3.6456	4.3789	3.2745
LP16-3	pKWmEB	TM59615	TM59598_TM59615_TM59623	D06	10246630	11537472	10903214	-0.0146	3.5244	4.251	20.9408
LP16-3	pKWmEB	TM74893	TM74864_TM74872_TM74873_TM74877_TM74893	D10	55659402	56891635	56391635	-0.004	4.863	5.6535	1.8037
LP16-3	pKWmEB	TM73048	TM73042_TM73048_TM73063	D10	0	921645	272772	-0.006	3.3647	4.0822	2.1123
LP16-3	pKWmEB	TM81865	TM81839_TM81844_TM81850_TM81851_TM81865_TM81874	D13	52777282	54122365	53550728	-0.0001	3.052	3.7506	2.0062
LP16-3	ISIS EM-BLASSO	TM49470	TM49470	D01	49268686	50268686	49768686	-0.0069	3.407	4.127	1.4344
LP16-3	ISIS EM-BLASSO	TM55216	TM55206_TM55216_TM55217_TM55218_TM55223	D03	42299450	43529568	42969311	0.011	3.346	4.0625	7.2576
LP16-3	ISIS EM-BLASSO	TM59411	TM59411_TM59417_TM59420	D06	8150745	9228975	8650745	0.0079	3.3146	4.0292	2.9962
LP16-4	mrMLM	TM21902	TM21901_TM21902	A08	2760801	3768447	3268447	0.0087	3.0802	3.78056	3.9674
LP16-4	mrMLM	TM28987	TM28987	A08	79042394	80042394	79542394	0.0091	4.6314	5.41216	4.6947
LP16-4	mrMLM	TM36876	TM36876_TM36880_TM36885	A10	99596949	100696471	100096949	-0.0494	9.5842	10.5136	26.4567
LP16-4	mrMLM	TM47852	TM47852_TM47858_TM47860_TM47862	D01	1327152	2532223	1827152	-0.0115	3.1738	3.87996	2.9947
LP16-4	mrMLM	TM55218	TM55206_TM55216_TM55217_TM55218_TM55223	D03	42299450	43529568	42999329	0.0119	4.6852	5.46827	4.9666
LP16-4	mrMLM	TM64041	TM64033_TM64041_TM64043_TM64057_TM64061	D07	17945478	19273363	18551697	0.0149	4.8408	5.63042	12.4261
LP16-4	FASTmrMLM	TM3181	TM3181_TM3182	A01	88385873	89509700	88885873	0.0099	3.6041	4.3351	2.4841
LP16-4	FASTmrMLM	TM14167	TM14167	A06	18708819	19708819	19208819	0.0002	3.7307	4.4685	0.0008
LP16-4	FASTmrMLM	TM21902	TM21901_TM21902	A08	2760801	3768447	3268447	0.0064	7.5709	8.4515	3.0347
LP16-4	FASTmrMLM	TM37264	TM37264	A11	7450701	8450701	7950701	-0.008	5.0282	5.8255	4.8284
LP16-4	FASTmrMLM	TM48309	TM48309_TM48310	D01	8882597	9885569	9382597	-0.0131	5.3447	6.1543	3.5161
LP16-4	FASTmrMLM	TM59417	TM59411_TM59417_TM59420	D06	8150745	9228975	8709267	0.0077	4.6188	5.399	3.3129
LP16-4	FASTmrMLM	TM64041	TM64033_TM64041_TM64043_TM64057_TM64061	D07	17945478	19273363	18551697	0.0121	4.7282	5.5131	11.494
LP16-4	FASTmrMLM	TM66984	TM66960_TM66973_TM66981_TM66984	D08	1682088	2914354	2414354	0.0113	3.8758	4.6211	3.9824
LP16-4	pLARmEB	TM99	TM91_TM99	A01	1887042	2977994	2477994	-0.0004	7.3346	8.2087	0.0031
LP16-4	pLARmEB	TM565	TM565_TM589	A01	9256363	10432709	9756363	0.0021	6.084	6.9199	0.097
LP16-4	pLARmEB	TM632	TM632	A01	10345639	11345639	10845639	0.0005	3.324	4.0392	0.0105
LP16-4	pLARmEB	TM3181	TM3181_TM3182	A01	88385873	89509700	88885873	0.0016	7.0658	7.9322	0.0518
LP16-4	pLARmEB	TM3628	TM3626_TM3628	A01	98022877	99034245	98534245	-0.0007	3.3443	4.0607	0.0333
LP16-4	pLARmEB	TM5536	TM5536_TM5549	A02	78370085	79475240	78870085	0.0006	3.9167	4.6641	0.0233
LP16-4	pLARmEB	TM5549	TM5536_TM5549	A02	78370085	79475240	78975240	0.0024	4.1304	4.8883	0.0895
LP16-4	pLARmEB	TM5649	TM5646_TM5649_TM5662	A02	79997099	81187074	80521614	0.0033	6.002	6.8351	0.2767
LP16-4	pLARmEB	TM5728	TM5728	A02	81750074	82750074	82250074	0.002	13.8893	14.9132	0.0739
LP16-4	pLARmEB	TM6386	TM6385_TM6386	A03	8580253	9597740	9097740	0.0007	3.1879	3.8949	0.0065
LP16-4	pLARmEB	TM6935	TM6935	A03	47106624	48106624	47606624	0.0026	7.3296	8.2036	0.3872
LP16-4	pLARmEB	TM7195	TM7195_TM7197	A03	71943432	73125572	72443432	0.0004	8.0273	8.92	0.0121
LP16-4	pLARmEB	TM11620	TM11604_TM11618_TM11619_TM11620_TM11628_TM11629_TM11631	A05	32077816	33400112	32783353	0.0007	7.3856	8.2611	0.0331
LP16-4	pLARmEB	TM16811	TM16811	A06	79761073	80761073	80261073	0.0002	9.8472	10.7823	0.0012
LP16-4	pLARmEB	TM18279	TM18279	A06	99144229	100144229	99644229	5.9642e-05	8.8661	9.7794	0.0001
LP16-4	pLARmEB	TM18428	TM18428_TM18434	A06	100977074	102034847	101477074	0.0008	4.6347	5.4156	0.0103
LP16-4	pLARmEB	TM18434	TM18428_TM18434	A06	100977074	102034847	101534847	0.0012	3.8177	4.56	0.0298
LP16-4	pLARmEB	TM19933	TM19933_TM19941_TM19955	A07	25385664	26569342	25885664	0.0004	3.0567	3.7556	0.0091
LP16-4	pLARmEB	TM21685	TM21685_TM21693	A07	76599421	77634639	77099421	0.0004	3.1702	3.8761	0.0037
LP16-4	pLARmEB	TM21693	TM21685_TM21693	A07	76599421	77634639	77134639	0.0008	6.2285	7.0691	0.0179
LP16-4	pLARmEB	TM21842	TM21842	A08	1463571	2463571	1963571	-0.0009	7.5016	8.3803	0.0467
LP16-4	pLARmEB	TM21901	TM21901_TM21902	A08	2760801	3768447	3260801	0.0013	5.6632	6.4845	0.0986
LP16-4	pLARmEB	TM21902	TM21901_TM21902	A08	2760801	3768447	3268447	0.0023	5.0763	5.8755	0.3151
LP16-4	pLARmEB	TM29130	TM29130	A08	84385942	85385942	84885942	-0.0056	10.4724	11.4203	2.016
LP16-4	pLARmEB	TM30233	TM30233	A09	4376815	5376815	4876815	0.0004	4.3764	5.1458	0.0083
LP16-4	pLARmEB	TM32705	TM32705	A09	51423851	52423851	51923851	-0.0004	8.1574	9.0534	0.0105
LP16-4	pLARmEB	TM33864	TM33864_TM33866_TM33870	A10	2245139	3441185	2745139	-0.0008	3.6838	4.4191	0.0347
LP16-4	pLARmEB	TM34047	TM34047	A10	8658020	9658020	9158020	-0.0004	5.8554	6.6835	0.0041
LP16-4	pLARmEB	TM34276	TM34276	A10	19895405	20895405	20395405	0.003	3.052	3.7506	0.1307
LP16-4	pLARmEB	TM34712	TM34712	A10	33993403	34993403	34493403	0.0004	8.5371	9.4425	0.0038
LP16-4	pLARmEB	TM35362	TM35362_TM35365_TM35366	A10	65024917	66186233	65524917	0.0011	4.2905	5.056	0.0468
LP16-4	pLARmEB	TM36634	TM36634_TM36639	A10	95697852	96726032	96197852	-0.0007	4.0479	4.8018	0.0203
LP16-4	pLARmEB	TM36885	TM36876_TM36880_TM36885	A10	99596949	100696471	100196471	-0.0041	3.9423	4.691	0.4686
LP16-4	pLARmEB	TM37362	TM37360_TM37362	A11	12149360	13162837	12662837	-0.0016	5.589	6.4076	0.1567
LP16-4	pLARmEB	TM37517	TM37517	A11	15978102	16978102	16478102	0.0001	10.1797	11.1217	0.0009
LP16-4	pLARmEB	TM37587	TM37587	A11	16934189	17934189	17434189	0.0011	8.1471	9.0429	0.0725
LP16-4	pLARmEB	TM39194	TM39194	A11	77590601	78590601	78090601	0.0004	11.7794	12.7518	0.0039
LP16-4	pLARmEB	TM40159	TM40159_TM40175_TM40195	A12	2566187	3910918	3066187	0.0014	15.7612	Inf	0.0627
LP16-4	pLARmEB	TM40491	TM40491	A12	7935841	8935841	8435841	-0.001	5.146	5.9479	0.0417
LP16-4	pLARmEB	TM41539	TM41539	A12	46368136	47368136	46868136	0.0008	11.5462	12.5145	0.0038
LP16-4	pLARmEB	TM42627	TM42627	A12	74416613	75416613	74916613	-0.0026	5.8541	6.6821	0.4192
LP16-4	pLARmEB	TM43186	TM43186_TM43187	A13	220071	1223672	720071	-0.0001	3.3896	4.1086	0.0007
LP16-4	pLARmEB	TM43727	TM43727	A13	13492423	14492423	13992423	-0.0006	13.5472	14.5566	0.0209
LP16-4	pLARmEB	TM47276	TM47276	A13	70944903	71944903	71444903	0.0004	5.588	6.4066	0.0073
LP16-4	pLARmEB	TM48310	TM48309_TM48310	D01	8882597	9885569	9385569	0.0036	8.6862	9.5952	0.2273
LP16-4	pLARmEB	TM49602	TM49602_TM49610	D01	53723609	54771659	54223609	-0.0003	6.0649	6.9001	0.0023
LP16-4	pLARmEB	TM50345	TM50345	D02	1022095	2022095	1522095	0.0003	4.1548	4.9139	0.0046
LP16-4	pLARmEB	TM50586	TM50585_TM50586_TM50588_TM50593_TM50607	D02	4448368	5708718	4961768	0.0004	5.3611	6.1713	0.008
LP16-4	pLARmEB	TM52733	TM52733	D02	57914009	58914009	58414009	-4.3978e-05	3.0398	3.7376	3.5848e-05
LP16-4	pLARmEB	TM53259	TM53255_TM53259	D02	64257272	65283705	64783705	0.0006	9.1017	10.0204	0.0215
LP16-4	pLARmEB	TM53286	TM53286	D02	64580440	65580440	65080440	-0.0006	12.3392	13.3211	0.0159
LP16-4	pLARmEB	TM53301	TM53301	D02	64969981	65969981	65469981	0.0019	4.9721	5.7671	0.2098
LP16-4	pLARmEB	TM55206	TM55206_TM55216_TM55217_TM55218_TM55223	D03	42299450	43529568	42799450	-0.001	3.6666	4.401	0.0357
LP16-4	pLARmEB	TM56533	TM56532_TM56533_TM56534	D04	47662105	48677501	48170356	0.0002	7.7419	8.6271	0.003
LP16-4	pLARmEB	TM56534	TM56532_TM56533_TM56534	D04	47662105	48677501	48177501	0.0006	12.5081	13.4937	0.0192
LP16-4	pLARmEB	TM59553	TM59553	D06	9646538	10646538	10146538	-0.0011	8.0181	8.9106	0.0616
LP16-4	pLARmEB	TM64043	TM64033_TM64041_TM64043_TM64057_TM64061	D07	17945478	19273363	18589259	-0.001	3.9877	4.7387	0.061
LP16-4	pLARmEB	TM64115	TM64115	D07	18756698	19756698	19256698	-0.0014	12.8869	13.879	0.1223
LP16-4	pLARmEB	TM64225	TM64225	D07	19786808	20786808	20286808	0.001	5.3266	6.1355	0.0025
LP16-4	pLARmEB	TM66960	TM66960_TM66973_TM66981_TM66984	D08	1682088	2914354	2182088	0.0011	17.2773	Inf	0.0478
LP16-4	pLARmEB	TM66984	TM66960_TM66973_TM66981_TM66984	D08	1682088	2914354	2414354	0.0047	7.6689	8.5522	0.5641
LP16-4	pLARmEB	TM69437	TM69437	D08	58066828	59066828	58566828	-0.0008	5.8669	6.6954	0.0311
LP16-4	pLARmEB	TM70000	TM70000	D09	1263749	2263749	1763749	-0.0001	23.5379	Inf	0.0011
LP16-4	pLARmEB	TM71614	TM71614	D09	22171129	23171129	22671129	-0.002	12.1547	13.1337	0.0571
LP16-4	pLARmEB	TM73063	TM73042_TM73048_TM73063	D10	0	921645	421645	-0.0003	5.4872	6.3021	0.0059
LP16-4	pLARmEB	TM73154	TM73152_TM73154	D10	1152035	2229717	1729717	0.0003	6.6117	7.4645	0.0054
LP16-4	pLARmEB	TM74199	TM74199	D10	23552743	24552743	24052743	-0.0004	5.0376	5.8352	0.0029
LP16-4	pLARmEB	TM74934	TM74934_TM74935_TM74941_TM74942	D10	56172377	57211377	56672377	-0.0002	5.5699	6.3878	0.0027
LP16-4	pLARmEB	TM75015	TM75015_TM75016	D10	57727476	58732976	58227476	-0.0019	6.133	6.9705	0.1401
LP16-4	pLARmEB	TM78492	TM78492	D12	30559977	31559977	31059977	0.0013	4.2853	5.0505	0.0781
LP16-4	pLARmEB	TM78512	TM78512	D12	33475064	34475064	33975064	-7.636e-05	5.8007	6.6269	0.0002
LP16-4	pLARmEB	TM79203	TM79203	D12	46249971	47249971	46749971	-0.0028	13.3708	14.3748	0.3008
LP16-4	pLARmEB	TM80397	TM80397	D13	5713246	6713246	6213246	0.0005	5.2293	6.0345	0.0085
LP16-4	pLARmEB	TM80414	TM80412_TM80414_TM80416	D13	7043336	8287560	7712810	0.0042	16.8861	Inf	1.0143
LP16-4	pLARmEB	TM80539	TM80539	D13	9971837	10971837	10471837	-0.0002	9.4129	10.3386	0.0021
LP16-4	pLARmEB	TM81839	TM81839_TM81844_TM81850_TM81851_TM81865_TM81874	D13	52777282	54122365	53277282	0.0007	4.5996	5.379	0.0076
LP16-4	pKWmEB	TM3181	TM3181_TM3182	A01	88385873	89509700	88885873	0.0058	4.3134	5.0799	2.8579
LP16-4	pKWmEB	TM5649	TM5646_TM5649_TM5662	A02	79997099	81187074	80521614	0.0059	3.794	4.5351	2.853
LP16-4	pKWmEB	TM6935	TM6935	A03	47106624	48106624	47606624	0.0005	5.2065	6.0108	2.5172
LP16-4	pKWmEB	TM33533	TM33533_TM33538	A09	69063086	70092228	69563086	0.0106	3.27	3.982	17.4702
LP16-4	pKWmEB	TM69498	TM69498_TM69503_TM69505_TM69517	D08	58667890	59856847	59167890	0.0003	3.2668	3.9786	3.8936
LP16-4	pKWmEB	TM77403	TM77403	D12	2070809	3070809	2570809	-0.0004	3.1587	3.8639	1.2608
LP16-4	ISIS EM-BLASSO	TM3181	TM3181_TM3182	A01	88385873	89509700	88885873	0.0087	3.3566	4.0737	1.7545
LP16-4	ISIS EM-BLASSO	TM3628	TM3626_TM3628	A01	98022877	99034245	98534245	-0.0033	3.4214	4.1422	0.7796
LP16-4	ISIS EM-BLASSO	TM5381	TM5381	A02	74844792	75844792	75344792	-0.0294	3.8655	4.6103	11.8568
LP16-4	ISIS EM-BLASSO	TM14167	TM14167	A06	18708819	19708819	19208819	0.0233	4.6553	5.4371	6.9947
LP16-4	ISIS EM-BLASSO	TM28987	TM28987	A08	79042394	80042394	79542394	0.0044	4.3343	5.1018	1.3846
LP16-4	ISIS EM-BLASSO	TM36876	TM36876_TM36880_TM36885	A10	99596949	100696471	100096949	-0.0291	3.4551	4.1778	11.6239
LP16-4	ISIS EM-BLASSO	TM80160	TM80159_TM80160_TM80162_TM80165_TM80171_TM80180	D13	2090468	3399108	2596706	0.0052	4.5155	5.2912	1.6535
LP17-4	mrMLM	TM66286	TM66286	D07	45516370	46516370	46016370	-0.0887	3.2456	3.95612	16.2799
LP17-4	FASTmrMLM	TM8393	TM8390_TM8393	A03	98664754	99702293	99202293	-0.0026	6.1533	6.9915	0.6245
LP17-4	FASTmrMLM	TM25143	TM25143	A08	41860159	42860159	42360159	0.0005	4.6972	5.4808	0.0098
LP17-4	FASTmrMLM	TM74935	TM74934_TM74935_TM74941_TM74942	D10	56172377	57211377	56683009	0.0003	3.1127	3.8151	0.0059
LP17-4	FASTmrMLM	TM74941	TM74934_TM74935_TM74941_TM74942	D10	56172377	57211377	56706421	0.0006	3.7315	4.4693	0.0292
LP17-4	FASTmrMLM	TM74942	TM74934_TM74935_TM74941_TM74942	D10	56172377	57211377	56711377	0.0009	4.337	5.1046	0.0605
LP17-4	pLARmEB	TM40268	TM40268_TM40284	A12	5636007	6804599	6136007	3.0708e-05	3.4146	4.135	1.2989e-05
LP17-4	pLARmEB	TM42122	TM42122	A12	64322287	65322287	64822287	-4.2825e-05	3.4161	4.1366	0.0001
LP17-4	pLARmEB	TM43423	TM43418_TM43423	A13	4630585	5718758	5218758	0.0036	3.8658	4.6106	0.6786
LP17-4	pLARmEB	TM56221	TM56221_TM56234	D04	39893473	41085916	40393473	0.0002	4.0804	4.8359	0.0018
LP17-4	pLARmEB	TM66286	TM66286	D07	45516370	46516370	46016370	-0.0992	6.7626	7.6201	15.8767
LP17-4	pLARmEB	TM66619	TM66618_TM66619	D07	50832554	51843060	51343060	0.0084	3.9279	4.6759	2.2678
LP17-4	pLARmEB	TM70248	TM70248	D09	4555259	5555259	5055259	5.6144e-05	3.7015	4.4377	5.2356e-05
LP17-4	pLARmEB	TM74829	TM74829	D10	55088104	56088104	55588104	-9.7767e-05	3.0078	3.7036	0.0003
LP17-4	pLARmEB	TM75886	TM75886_TM75889	D11	14987787	16041137	15487787	0.0003	3.6776	4.4126	0.0055
LP17-4	pKWmEB	TM79023	TM79023	D12	42835697	43835697	43335697	-0.0102	3.703	4.4393	19.6518
LP17-4	ISIS EM-BLASSO	TM8393	TM8390_TM8393	A03	98664754	99702293	99202293	-0.002	3.2329	3.9427	0.3007
LP17-4	ISIS EM-BLASSO	TM74864	TM74864_TM74872_TM74873_TM74877_TM74893	D10	55659402	56891635	56159402	-0.0064	7.0006	7.8651	2.1666
LP16-5	mrMLM	TM9965	TM9965	A05	355523	1355523	855523	-0.0328	3.6671	4.40151	11.8238
LP16-5	mrMLM	TM37264	TM37264	A11	7450701	8450701	7950701	-0.0093	3.5694	4.2985	4.0064
LP16-5	mrMLM	TM66984	TM66960_TM66973_TM66981_TM66984	D08	1682088	2914354	2414354	0.0187	4.9677	5.76253	6.7062
LP16-5	mrMLM	TM80324	TM80319_TM80324	D13	4489161	5635681	5135681	0.0344	3.569	4.29808	14.948
LP16-5	FASTmrMLM	TM80324	TM80319_TM80324	D13	4489161	5635681	5135681	0.0314	4.2183	4.9804	13.6104
LP16-5	FASTmrEMMA	TM66984	TM66960_TM66973_TM66981_TM66984	D08	1682088	2914354	2414354	0.0054	3.1007	3.8024	0.1712
LP16-5	pLARmEB	TM5759	TM5759	A02	82038617	83038617	82538617	-0.0084	3.9787	4.7292	1.2884
LP16-5	pLARmEB	TM9965	TM9965	A05	355523	1355523	855523	-0.0293	4.9213	5.7142	9.6676
LP16-5	pLARmEB	TM29130	TM29130	A08	84385942	85385942	84885942	-0.0008	3.6545	4.3882	0.0304
LP16-5	pLARmEB	TM42642	TM42642	A12	75979039	76979039	76479039	0.0037	3.3135	4.028	0.6831
LP16-5	pLARmEB	TM56628	TM56624_TM56628_TM56644	D04	49343511	50480613	49871040	0.014	4.5889	5.3678	6.0414
LP16-5	pLARmEB	TM80324	TM80319_TM80324	D13	4489161	5635681	5135681	0.03	6.3646	7.2097	11.6723
LP16-5	pKWmEB	TM5123	TM5123	A02	72845534	73845534	73345534	0.0092	3.6209	4.3528	5.6955
LP16-5	pKWmEB	TM5905	TM5905	A03	1728745	2728745	2228745	0.0045	3.4962	4.2212	3.8354
LP16-5	ISIS EM-BLASSO	TM5953	TM5953	A03	2249210	3249210	2749210	0.0052	3.123	3.826	0.5864
LP16-5	ISIS EM-BLASSO	TM9965	TM9965	A05	355523	1355523	855523	-0.0247	4.4775	5.2515	6.8508
LP16-5	ISIS EM-BLASSO	TM14167	TM14167	A06	18708819	19708819	19208819	0.0242	3.7271	4.4647	5.2723
LP16-5	ISIS EM-BLASSO	TM21631	TM21631	A07	76036552	77036552	76536552	0.0026	3.0585	3.7575	0.3388
LP16-5	ISIS EM-BLASSO	TM37196	TM37195_TM37196	A11	5747892	6757471	6257471	-0.0073	4.2743	5.039	2.4106
LP16-5	ISIS EM-BLASSO	TM37958	TM37937_TM37955_TM37957_TM37958	A11	21573281	22717251	22217251	0.0082	6.339	7.1832	3.3204
LP16-5	ISIS EM-BLASSO	TM41800	TM41800	A12	57034482	58034482	57534482	-0.0158	4.0286	4.7816	7.137
LP16-5	ISIS EM-BLASSO	TM42900	TM42899_TM42900_TM42902_TM42903_TM42912	A12	80601484	81817517	81105641	0.0069	4.9434	5.7372	2.2666
LP16-5	ISIS EM-BLASSO	TM66984	TM66960_TM66973_TM66981_TM66984	D08	1682088	2914354	2414354	0.0138	4.3969	5.1673	3.7351
LP16-5	ISIS EM-BLASSO	TM80319	TM80319_TM80324	D13	4489161	5635681	4989161	-0.0183	7.7831	8.6694	4.6639
LP16-6	mrMLM	TM2506	TM2506	A01	81612827	82612827	82112827	-0.0193	4.8139	5.60241	14.3002
LP16-6	mrMLM	TM6922	TM6922	A03	39497880	40497880	39997880	0.0075	3.4527	4.17529	1.84
LP16-6	mrMLM	TM24664	TM24664	A08	38110555	39110555	38610555	0.0451	6.2911	7.13378	30.797
LP16-6	mrMLM	TM32787	TM32787_TM32796	A09	52382479	53479963	52882479	0.0154	3.5039	4.22937	8.8971
LP16-6	mrMLM	TM30335	TM30335	A09	5748755	6748755	6248755	-0.0073	4.7965	5.58428	2.0295
LP16-6	mrMLM	TM37957	TM37937_TM37955_TM37957_TM37958	A11	21573281	22717251	22210246	0.0076	4.3895	5.15954	2.1356
LP16-6	mrMLM	TM42627	TM42627	A12	74416613	75416613	74916613	-0.0151	3.0508	3.7493	8.6611
LP16-6	FASTmrMLM	TM11619	TM11604_TM11618_TM11619_TM11620_TM11628_TM11629_TM11631	A05	32077816	33400112	32777019	-0.0047	3.0575	3.7564	1.6237
LP16-6	FASTmrMLM	TM30335	TM30335	A09	5748755	6748755	6248755	-0.0045	4.1041	4.8608	1.4618
LP16-6	FASTmrMLM	TM53660	TM53660	D03	5617174	6617174	6117174	1.8299e-05	3.0395	3.7373	1.0033e-05
LP16-6	pLARmEB	TM26	TM26	A01	435804	1435804	935804	-0.0008	7.7167	8.6013	0.0296
LP16-6	pLARmEB	TM91	TM91_TM99	A01	1887042	2977994	2387042	-0.0038	4.1181	4.8754	0.1992
LP16-6	pLARmEB	TM3182	TM3181_TM3182	A01	88385873	89509700	89009700	0.0015	6.6758	7.5306	0.0284
LP16-6	pLARmEB	TM3626	TM3626_TM3628	A01	98022877	99034245	98522877	-0.0006	4.5334	5.3099	0.0181
LP16-6	pLARmEB	TM3628	TM3626_TM3628	A01	98022877	99034245	98534245	-0.0001	8.7677	9.6787	0.001
LP16-6	pLARmEB	TM3989	TM3989_TM3995	A02	4359049	5409648	4859049	0.0007	4.9161	5.7088	0.0199
LP16-6	pLARmEB	TM5381	TM5381	A02	74844792	75844792	75344792	-0.004	5.9371	6.768	0.1649
LP16-6	pLARmEB	TM5549	TM5536_TM5549	A02	78370085	79475240	78975240	0.0006	18.9205	Inf	0.0043
LP16-6	pLARmEB	TM5621	TM5599_TM5616_TM5621_TM5628_TM5637	A02	79369316	80793655	80151887	0.0016	15.7869	Inf	0.1197
LP16-6	pLARmEB	TM5637	TM5599_TM5616_TM5621_TM5628_TM5637	A02	79369316	80793655	80293655	0.0003	31.1235	Inf	0.0021
LP16-6	pLARmEB	TM5728	TM5728	A02	81750074	82750074	82250074	0.0024	7.928	8.8181	0.0863
LP16-6	pLARmEB	TM5759	TM5759	A02	82038617	83038617	82538617	-0.0142	5.9516	6.783	3.9434
LP16-6	pLARmEB	TM5905	TM5905	A03	1728745	2728745	2228745	0.0023	15.61	Inf	0.2905
LP16-6	pLARmEB	TM8661	TM8661_TM8665	A04	2409803	3570503	2909803	0.0027	11.5489	12.5172	0.3287
LP16-6	pLARmEB	TM8665	TM8661_TM8665	A04	2409803	3570503	3070503	-0.0006	9.8946	10.8307	0.0163
LP16-6	pLARmEB	TM9835	TM9812_TM9817_TM9821_TM9835	A04	59735276	61056214	60556214	0.0009	16.8474	Inf	0.0403
LP16-6	pLARmEB	TM10215	TM10215	A05	4165526	5165526	4665526	-0.0002	5.6578	6.4789	0.0009
LP16-6	pLARmEB	TM10538	TM10538	A05	10871307	11871307	11371307	0.0006	10.4866	11.4348	0.0104
LP16-6	pLARmEB	TM11157	TM11157_TM11163_TM11169	A05	24635142	25838414	25135142	-0.0003	12.517	13.5028	0.0026
LP16-6	pLARmEB	TM11620	TM11604_TM11618_TM11619_TM11620_TM11628_TM11629_TM11631	A05	32077816	33400112	32783353	0.0004	6.476	7.3246	0.0071
LP16-6	pLARmEB	TM11631	TM11604_TM11618_TM11619_TM11620_TM11628_TM11629_TM11631	A05	32077816	33400112	32900112	0.0005	14.5642	15.6536	0.0152
LP16-6	pLARmEB	TM11726	TM11695_TM11705_TM11726_TM11728_TM11740	A05	34420081	35799312	35197054	-0.0004	10.1276	11.0685	0.0086
LP16-6	pLARmEB	TM13487	TM13487	A05	90297796	91297796	90797796	0.0006	8.1113	9.0062	0.0187
LP16-6	pLARmEB	TM13514	TM13514_TM13525_TM13526	A05	90941073	92118264	91441073	0.0005	9.9692	10.9068	0.0121
LP16-6	pLARmEB	TM13695	TM13695	A06	1912708	2912708	2412708	0.0041	13.3572	14.3525	0.4444
LP16-6	pLARmEB	TM14767	TM14767	A06	54232234	55232234	54732234	0.0002	3.4223	4.1432	0.0004
LP16-6	pLARmEB	TM19425	TM19425	A07	19962037	20962037	20462037	0.0044	7.4387	8.3157	0.3108
LP16-6	pLARmEB	TM20594	TM20594	A07	47472434	48472434	47972434	-0.0003	11.4093	12.375	0.0043
LP16-6	pLARmEB	TM21119	TM21119_TM21134	A07	70056827	71176245	70556827	0.0004	14.5659	15.6536	0.0033
LP16-6	pLARmEB	TM21134	TM21119_TM21134	A07	70056827	71176245	70676245	0.0003	9.5166	10.4446	0.0017
LP16-6	pLARmEB	TM21292	TM21292_TM21293	A07	71567994	72582453	72067994	0.0004	12.3789	13.3613	0.0035
LP16-6	pLARmEB	TM21365	TM21365	A07	72363335	73363335	72863335	0.0011	4.2285	4.9911	0.0641
LP16-6	pLARmEB	TM21395	TM21395	A07	72663006	73663006	73163006	0.0003	4.7571	5.5432	0.0033
LP16-6	pLARmEB	TM21456	TM21456	A07	73529662	74529662	74029662	0.0005	5.8396	6.6671	0.004
LP16-6	pLARmEB	TM21685	TM21685_TM21693	A07	76599421	77634639	77099421	0.0004	3.2497	3.9605	0.0025
LP16-6	pLARmEB	TM21842	TM21842	A08	1463571	2463571	1963571	-0.0017	3.1687	3.8746	0.1558
LP16-6	pLARmEB	TM28976	TM28976	A08	78780057	79780057	79280057	0.0013	5.3407	6.1501	0.0954
LP16-6	pLARmEB	TM28987	TM28987	A08	79042394	80042394	79542394	0.0028	4.8185	5.6072	0.4093
LP16-6	pLARmEB	TM29130	TM29130	A08	84385942	85385942	84885942	-0.0017	7.5282	8.4077	0.1486
LP16-6	pLARmEB	TM29193	TM29193	A08	84848306	85848306	85348306	-0.0005	28.9307	Inf	0.0149
LP16-6	pLARmEB	TM30233	TM30233	A09	4376815	5376815	4876815	0.0012	4.2696	5.0341	0.0713
LP16-6	pLARmEB	TM30335	TM30335	A09	5748755	6748755	6248755	-0.0025	4.0976	4.8539	0.3476
LP16-6	pLARmEB	TM31534	TM31534	A09	36002156	37002156	36502156	0.0011	5.8709	6.6995	0.0653
LP16-6	pLARmEB	TM32438	TM32438	A09	48989151	49989151	49489151	0.002	4.3763	5.1457	0.1388
LP16-6	pLARmEB	TM33126	TM33126	A09	62467904	63467904	62967904	-0.0034	22.2543	Inf	0.5444
LP16-6	pLARmEB	TM33533	TM33533_TM33538	A09	69063086	70092228	69563086	0.0005	8.1628	9.059	0.0091
LP16-6	pLARmEB	TM33887	TM33887_TM33890	A10	2747228	3783357	3247228	-0.0018	5.2482	6.0541	0.1777
LP16-6	pLARmEB	TM33890	TM33887_TM33890	A10	2747228	3783357	3283357	0.0009	7.1324	8.0008	0.0146
LP16-6	pLARmEB	TM36634	TM36634_TM36639	A10	95697852	96726032	96197852	-0.0007	5.8511	6.679	0.0178
LP16-6	pLARmEB	TM37517	TM37517	A11	15978102	16978102	16478102	0.0008	6.09	6.9261	0.0332
LP16-6	pLARmEB	TM37587	TM37587	A11	16934189	17934189	17434189	0.0028	28.9181	Inf	0.4311
LP16-6	pLARmEB	TM37838	TM37838	A11	19981162	20981162	20481162	0.0004	9.6354	10.5659	0.0063
LP16-6	pLARmEB	TM39323	TM39323	A11	81160964	82160964	81660964	-4.3184e-05	14.0265	15.0515	2.8234e-05
LP16-6	pLARmEB	TM40175	TM40159_TM40175_TM40195	A12	2566187	3910918	3215399	0.0008	6.6064	7.4591	0.0265
LP16-6	pLARmEB	TM42734	TM42734	A12	77013377	78013377	77513377	0.0014	6.5292	7.3795	0.1036
LP16-6	pLARmEB	TM42900	TM42899_TM42900_TM42902_TM42903_TM42912	A12	80601484	81817517	81105641	0.0014	7.8462	8.7342	0.1003
LP16-6	pLARmEB	TM42903	TM42899_TM42900_TM42902_TM42903_TM42912	A12	80601484	81817517	81251436	-0.0009	11.1426	12.1035	0.0265
LP16-6	pLARmEB	TM43019	TM43019_TM43022	A12	84016876	85081480	84516876	-0.0003	5.9656	6.7975	0.0018
LP16-6	pLARmEB	TM43022	TM43019_TM43022	A12	84016876	85081480	84581480	0.0005	4.874	5.665	0.004
LP16-6	pLARmEB	TM43187	TM43186_TM43187	A13	220071	1223672	723672	-0.0007	6.0243	6.8582	0.0232
LP16-6	pLARmEB	TM43727	TM43727	A13	13492423	14492423	13992423	-0.0004	12.5528	13.5379	0.0093
LP16-6	pLARmEB	TM48166	TM48166	D01	6263937	7263937	6763937	-0.0036	13.0372	14.0303	0.3684
LP16-6	pLARmEB	TM48310	TM48309_TM48310	D01	8882597	9885569	9385569	0.0015	12.8185	13.8085	0.0333
LP16-6	pLARmEB	TM49970	TM49970_TM49994	D01	56233771	57363661	56733771	0.0011	5.4276	6.2403	0.0568
LP16-6	pLARmEB	TM50172	TM50172	D01	60105696	61105696	60605696	0.0002	7.2687	8.141	0.0007
LP16-6	pLARmEB	TM50455	TM50444_TM50455	D02	2226595	3352379	2852379	-0.0005	30.4018	Inf	0.0098
LP16-6	pLARmEB	TM50586	TM50585_TM50586_TM50588_TM50593_TM50607	D02	4448368	5708718	4961768	0.0008	10.9518	11.909	0.0194
LP16-6	pLARmEB	TM50588	TM50585_TM50586_TM50588_TM50593_TM50607	D02	4448368	5708718	4973940	0.0005	10.5802	11.5302	0.0084
LP16-6	pLARmEB	TM53145	TM53145	D02	63023957	64023957	63523957	0.0006	6.8084	7.6672	0.0159
LP16-6	pLARmEB	TM53259	TM53255_TM53259	D02	64257272	65283705	64783705	0.0005	8.4029	9.3051	0.0152
LP16-6	pLARmEB	TM53311	TM53311_TM53314_TM53320	D02	65229829	66404953	65729829	-0.0014	3.1422	3.8464	0.1066
LP16-6	pLARmEB	TM53314	TM53311_TM53314_TM53320	D02	65229829	66404953	65769152	-0.0007	4.9152	5.7079	0.0224
LP16-6	pLARmEB	TM53519	TM53519	D03	2353661	3353661	2853661	0.0007	3.402	4.1217	0.0101
LP16-6	pLARmEB	TM54574	TM54574	D03	26753092	27753092	27253092	0.0003	5.1696	5.9724	0.0025
LP16-6	pLARmEB	TM54972	TM54954_TM54972	D03	37168070	38315304	37815304	-0.002	18.7138	Inf	0.1147
LP16-6	pLARmEB	TM55216	TM55206_TM55216_TM55217_TM55218_TM55223	D03	42299450	43529568	42969311	0.0008	12.6654	13.6536	0.0302
LP16-6	pLARmEB	TM55259	TM55259_TM55265	D03	43228082	44271208	43728082	0.0005	3.8672	4.6121	0.0094
LP16-6	pLARmEB	TM55876	TM55870_TM55876	D04	8587346	9695147	9195147	0.0013	3.1906	3.8978	0.0191
LP16-6	pLARmEB	TM55914	TM55914	D04	10123250	11123250	10623250	-0.0011	13.154	14.1484	0.0376
LP16-6	pLARmEB	TM56499	TM56492_TM56499_TM56500	D04	46870404	47961105	47455075	-0.0021	4.3156	5.0823	0.2013
LP16-6	pLARmEB	TM56803	TM56803	D05	2219525	3219525	2719525	-0.0015	9.5704	10.4995	0.0661
LP16-6	pLARmEB	TM57884	TM57884_TM57914	D05	29830121	31015705	30330121	0.002	29.7475	Inf	0.1705
LP16-6	pLARmEB	TM58440	TM58440_TM58443	D05	52058747	53079953	52558747	0.0003	3.1882	3.8952	0.0045
LP16-6	pLARmEB	TM58780	TM58766_TM58780	D05	59055865	60191907	59691907	0.0003	10.1787	11.1207	0.0049
LP16-6	pLARmEB	TM58795	TM58795_TM58801	D05	59474581	60509734	59974581	-0.0003	3.0035	3.699	0.0015
LP16-6	pLARmEB	TM58849	TM58845_TM58849_TM58866	D05	60991077	62200714	61536688	-0.0009	5.4419	6.2551	0.0299
LP16-6	pLARmEB	TM58866	TM58845_TM58849_TM58866	D05	60991077	62200714	61700714	0.0003	6.915	7.777	0.0055
LP16-6	pLARmEB	TM58957	TM58957_TM58958_TM58975	D06	790825	1989688	1290825	-0.0059	6.2744	7.1165	0.4188
LP16-6	pLARmEB	TM59048	TM59048_TM59049	D06	1600455	2624769	2100455	0.0008	8.9328	9.8476	0.0219
LP16-6	pLARmEB	TM59188	TM59188	D06	4593832	5593832	5093832	0.0016	11.321	12.2852	0.127
LP16-6	pLARmEB	TM59499	TM59499	D06	8995729	9995729	9495729	0.0015	7.2431	8.1146	0.0864
LP16-6	pLARmEB	TM59574	TM59572_TM59574_TM59575	D06	9901257	10992651	10483374	0.0012	3.5122	4.2381	0.0569
LP16-6	pLARmEB	TM59658	TM59658_TM59659	D06	11189666	12206611	11689666	0.0006	9.3076	10.2309	0.0164
LP16-6	pLARmEB	TM59659	TM59658_TM59659	D06	11189666	12206611	11706611	0.0003	10.5818	11.5319	0.0037
LP16-6	pLARmEB	TM59680	TM59680	D06	11465990	12465990	11965990	-0.0037	6.2637	7.1055	0.0966
LP16-6	pLARmEB	TM61922	TM61922	D06	48752185	49752185	49252185	-0.0017	5.4429	6.2562	0.0689
LP16-6	pLARmEB	TM63300	TM63300_TM63306_TM63308	D07	2901093	3936525	3401093	0.0005	5.5361	6.3528	0.0033
LP16-6	pLARmEB	TM63317	TM63317_TM63332	D07	3491185	4607038	3991185	0.0012	5.3475	6.1572	0.0171
LP16-6	pLARmEB	TM63371	TM63371	D07	4729848	5729848	5229848	0.0004	3.2507	3.9615	0.0081
LP16-6	pLARmEB	TM63779	TM63779	D07	11319375	12319375	11819375	0.0005	7.2765	8.149	0.0107
LP16-6	pLARmEB	TM66618	TM66618_TM66619	D07	50832554	51843060	51332554	-0.0002	4.7986	5.5865	0.0007
LP16-6	pLARmEB	TM66984	TM66960_TM66973_TM66981_TM66984	D08	1682088	2914354	2414354	0.0032	16.557	Inf	0.2199
LP16-6	pLARmEB	TM67161	TM67161	D08	4468145	5468145	4968145	-0.0005	6.6541	7.5082	0.0151
LP16-6	pLARmEB	TM67410	TM67410	D08	7736909	8736909	8236909	0.0004	4.7895	5.577	0.0068
LP16-6	pLARmEB	TM69387	TM69381_TM69387	D08	57535175	58659701	58159701	0.0029	5.1821	5.9854	0.297
LP16-6	pLARmEB	TM69498	TM69498_TM69503_TM69505_TM69517	D08	58667890	59856847	59167890	0.0005	7.5214	8.4007	0.0028
LP16-6	pLARmEB	TM69505	TM69498_TM69503_TM69505_TM69517	D08	58667890	59856847	59261377	0.0011	8.5781	9.4845	0.0591
LP16-6	pLARmEB	TM69814	TM69813_TM69814	D08	63126263	64153155	63653155	-0.0059	18.4306	Inf	0.1624
LP16-6	pLARmEB	TM70128	TM70128_TM70130	D09	2489132	3543146	2989132	0.0004	5.6634	6.4847	0.0031
LP16-6	pLARmEB	TM71614	TM71614	D09	22171129	23171129	22671129	-0.0047	5.2007	6.0048	0.2698
LP16-6	pLARmEB	TM71860	TM71860	D09	28550628	29550628	29050628	0.0039	6.5346	7.385	0.0508
LP16-6	pLARmEB	TM72221	TM72221_TM72227	D09	38130436	39189341	38630436	-0.0025	10.1162	11.0569	0.093
LP16-6	pLARmEB	TM72461	TM72461	D09	41141711	42141711	41641711	-0.0006	16.9215	Inf	0.017
LP16-6	pLARmEB	TM73564	TM73564	D10	6387955	7387955	6887955	-0.0006	8.648	9.5561	0.0054
LP16-6	pLARmEB	TM73666	TM73666	D10	7735563	8735563	8235563	0.0002	12.2029	13.183	0.0016
LP16-6	pLARmEB	TM73693	TM73693	D10	7959663	8959663	8459663	-1.1663e-05	4.3767	5.1462	7.1055e-06
LP16-6	pLARmEB	TM74199	TM74199	D10	23552743	24552743	24052743	-0.0003	5.3923	6.2037	0.0015
LP16-6	pLARmEB	TM74629	TM74629	D10	50513147	51513147	51013147	-0.0003	3.6658	4.4001	0.001
LP16-6	pLARmEB	TM77099	TM77099	D11	58693955	59693955	59193955	0.0002	7.8106	8.6977	0.0013
LP16-6	pLARmEB	TM79137	TM79137	D12	43820386	44820386	44320386	-0.0014	31.5633	Inf	0.0173
LP16-6	pLARmEB	TM79674	TM79659_TM79674	D12	52900022	54076561	53576561	0.0006	4.9101	5.7026	0.0081
LP16-6	pLARmEB	TM80180	TM80159_TM80160_TM80162_TM80165_TM80171_TM80180	D13	2090468	3399108	2899108	-0.0014	9.8098	10.7441	0.0981
LP16-6	pLARmEB	TM80397	TM80397	D13	5713246	6713246	6213246	0.0003	7.2354	8.1067	0.0023
LP16-6	pLARmEB	TM82168	TM82156_TM82168	D13	58492627	59589811	59089811	-0.0004	12.8291	13.8211	0.0023
LP16-6	pKWmEB	TM6101	TM6101	A03	4324846	5324846	4824846	0.0002	3.4966	4.2217	1.2036
LP16-6	pKWmEB	TM21842	TM21842	A08	1463571	2463571	1963571	-0.0099	3.6052	4.3363	19.0176
LP16-6	pKWmEB	TM37264	TM37264	A11	7450701	8450701	7950701	-0.005	3.7169	4.454	4.7936
LP17-5	FASTmrEMMA	TM57964	TM57964	D05	30496712	31496712	30996712	0.0103	3.4014	4.1211	1.8024
LP17-5	pLARmEB	TM7481	TM7481	A03	80633286	81633286	81133286	-0.0117	6.1825	7.0216	4.5816
LP17-5	pLARmEB	TM21293	TM21292_TM21293	A07	71567994	72582453	72082453	-0.0106	4.6193	5.3995	3.8018
LP17-5	pLARmEB	TM28868	TM28868	A08	76501027	77501027	77001027	-0.0173	4.1634	4.9229	3.6365
LP17-5	pLARmEB	TM48070	TM48068_TM48070	D01	4913817	6063241	5563241	0.0019	3.3721	4.0901	0.31
LP17-5	pLARmEB	TM70130	TM70128_TM70130	D09	2489132	3543146	3043146	0.0003	3.195	3.9025	0.0028
LP17-5	pLARmEB	TM76150	TM76150	D11	22267718	23267718	22767718	0.0067	5.5857	6.4042	1.4743
LP17-5	pLARmEB	TM79797	TM79797_TM79798	D12	55262421	56326700	55762421	-0.0091	8.7164	9.6261	3.3965
LP17-5	pKWmEB	TM7481	TM7481	A03	80633286	81633286	81133286	-0.0097	4.4977	5.2726	5.5762
LP17-5	pKWmEB	TM33774	TM33774	A09	73884693	74884693	74384693	0.0033	3.8908	4.6369	2.8322
LP17-5	pKWmEB	TM50251	TM50224_TM50236_TM50251	D02	0	951849	451849	-0.0053	4.4359	5.208	5.7592
LP17-5	pKWmEB	TM69769	TM69767_TM69769	D08	61889525	62984405	62484405	0.0035	5.2923	6.0999	1.9069
LP17-5	pKWmEB	TM79797	TM79797_TM79798	D12	55262421	56326700	55762421	-0.0088	8.2284	9.1262	4.6496
LP17-5	ISIS EM-BLASSO	TM7481	TM7481	A03	80633286	81633286	81133286	-0.0092	5.4571	6.2709	2.8539
LP17-5	ISIS EM-BLASSO	TM79797	TM79797_TM79798	D12	55262421	56326700	55762421	-0.0043	3.711	4.4478	0.7594
LP17-6	FASTmrMLM	TM5123	TM5123	A02	72845534	73845534	73345534	8.4877e-05	3.2155	3.9242	0.0002
LP17-6	FASTmrMLM	TM11391	TM11391	A05	28971329	29971329	29471329	-0.0023	3.9488	4.6978	0.343
LP17-6	FASTmrMLM	TM24405	TM24405	A08	35878390	36878390	36378390	5.0314e-05	7.0426	7.9084	7.3404e-05
LP17-6	FASTmrMLM	TM24664	TM24664	A08	38110555	39110555	38610555	1.3722e-05	5.4241	6.2367	5.7497e-06
LP17-6	FASTmrMLM	TM33585	TM33585_TM33588	A09	69522287	70537577	70022287	0.0002	5.252	6.058	0.0019
LP17-6	FASTmrMLM	TM54493	TM54493	D03	26140522	27140522	26640522	2.0865e-05	3.7763	4.5165	9.4726e-06
LP17-6	pLARmEB	TM39985	TM39985	A12	0	907330	407330	0.003	5.2315	6.0368	0.4148
LP17-6	pLARmEB	TM53545	TM53545	D03	2787955	3787955	3287955	0.0073	4.1804	4.9407	2.5668
LP17-6	pLARmEB	TM77868	TM77868	D12	10366242	11366242	10866242	0.0025	3.2486	3.9593	0.0297
LP17-6	pLARmEB	TM80220	TM80201_TM80220_TM80222	D13	2997533	4212736	3696952	0.0051	6.8879	7.7491	1.835
LP17-6	pKWmEB	TM10691	TM10691	A05	13960194	14960194	14460194	0.0043	3.5646	4.2934	8.4169
LP17-6	pKWmEB	TM77868	TM77868	D12	10366242	11366242	10866242	0.0321	3.9892	4.7402	3.2721
LP17-6	ISIS EM-BLASSO	TM11604	TM11604_TM11618_TM11619_TM11620_TM11628_TM11629_TM11631	A05	32077816	33400112	32577816	-0.0059	3.3588	4.076	2.0163
LP17-6	ISIS EM-BLASSO	TM79798	TM79797_TM79798	D12	55262421	56326700	55826700	-0.0002	3.3526	4.0694	0.0015
LP16-7	mrMLM	TM11318	TM11318_TM11329_TM11331	A05	27795887	28952309	28295887	-0.0178	3.3951	4.1144	11.9467
LP16-7	mrMLM	TM24664	TM24664	A08	38110555	39110555	38610555	0.0444	5.1817	5.98502	29.1393
LP16-7	mrMLM	TM59680	TM59680	D06	11465990	12465990	11965990	-0.0517	5.171	5.9739	13.4686
LP16-7	mrMLM	TM73116	TM73116	D10	461642	1461642	961642	-0.0102	5.0306	5.82796	3.5912
LP16-7	mrMLM	TM79255	TM79255_TM79256	D12	47507978	48511753	48007978	-0.01	4.6027	5.38221	2.6646
LP16-7	FASTmrMLM	TM57884	TM57884_TM57914	D05	29830121	31015705	30330121	0.0049	4.0709	4.8259	1.0972
LP16-7	FASTmrMLM	TM59572	TM59572_TM59574_TM59575	D06	9901257	10992651	10401257	0.0005	5.0597	5.8582	0.0116
LP16-7	FASTmrMLM	TM59680	TM59680	D06	11465990	12465990	11965990	-0.0307	3.4026	4.1223	7.3893
LP16-7	FASTmrMLM	TM79255	TM79255_TM79256	D12	47507978	48511753	48007978	-6.7729e-05	5.119	5.9199	0.0002
LP16-7	FASTmrEMMA	TM59049	TM59048_TM59049	D06	1600455	2624769	2124769	0.0185	5.0844	5.8839	3.0969
LP16-7	pLARmEB	TM6282	TM6282	A03	6135561	7135561	6635561	0.0119	5.0035	5.7998	3.0581
LP16-7	pLARmEB	TM13774	TM13774	A06	3981268	4981268	4481268	-6.4209e-05	3.4096	4.1297	0.0001
LP16-7	pLARmEB	TM36426	TM36426	A10	92647308	93647308	93147308	-0.0052	4.0592	4.8137	0.4556
LP16-7	pLARmEB	TM50586	TM50585_TM50586_TM50588_TM50593_TM50607	D02	4448368	5708718	4961768	0.0084	6.7611	7.6185	1.2697
LP16-7	pLARmEB	TM59658	TM59658_TM59659	D06	11189666	12206611	11689666	0.0047	3.1867	3.8937	0.5068
LP16-7	pLARmEB	TM74003	TM74003_TM74004	D10	21783428	22832407	22283428	0.0017	3.1616	3.867	0.0829
LP16-7	pLARmEB	TM79203	TM79203	D12	46249971	47249971	46749971	-0.0096	4.138	4.8963	1.5964
LP16-7	pLARmEB	TM80220	TM80201_TM80220_TM80222	D13	2997533	4212736	3696952	1.4791e-05	3.4757	4.1996	5.9952e-06
LP16-7	pKWmEB	TM6101	TM6101	A03	4324846	5324846	4824846	0.0035	3.6789	4.4139	1.2182
LP16-7	pKWmEB	TM8661	TM8661_TM8665	A04	2409803	3570503	2909803	0.0006	3.7557	4.4948	0.7613
LP16-7	pKWmEB	TM21334	TM21334	A07	71887567	72887567	72387567	-0.0116	3.1573	3.8625	14.2463
LP16-7	pKWmEB	TM59049	TM59048_TM59049	D06	1600455	2624769	2124769	0.0086	4.2251	4.9875	5.0554
LP16-7	ISIS EM-BLASSO	TM11628	TM11604_TM11618_TM11619_TM11620_TM11628_TM11629_TM11631	A05	32077816	33400112	32828410	-0.0053	4.2214	4.9837	1.6611
LP16-7	ISIS EM-BLASSO	TM57884	TM57884_TM57914	D05	29830121	31015705	30330121	0.014	3.196	3.9035	9.2929
LP16-7	ISIS EM-BLASSO	TM59049	TM59048_TM59049	D06	1600455	2624769	2124769	0.0092	3.7981	4.5394	2.8103
LP16-7	ISIS EM-BLASSO	TM59598	TM59598_TM59615_TM59623	D06	10246630	11537472	10746630	0.0099	8.6739	9.5826	5.3991
LP16-7	ISIS EM-BLASSO	TM73042	TM73042_TM73048_TM73063	D10	0	921645	214530	1.8862e-05	3.5789	4.3085	1.6441e-05
LP16-7	ISIS EM-BLASSO	TM79203	TM79203	D12	46249971	47249971	46749971	-0.0137	4.0053	4.7571	6.8466
LP16-8	FASTmrMLM	TM11642	TM11642	A05	32659343	33659343	33159343	0.0003	5.8476	6.6754	0.0095
LP16-8	FASTmrMLM	TM14157	TM14156_TM14157	A06	18141708	19252028	18752028	-0.0006	3.787	4.5277	0.0042
LP16-8	FASTmrMLM	TM30335	TM30335	A09	5748755	6748755	6248755	-0.0023	3.4891	4.2137	0.4712
LP16-8	FASTmrMLM	TM42435	TM42435	A12	71793095	72793095	72293095	-0.0002	3.0963	3.7977	0.0024
LP16-8	FASTmrMLM	TM50251	TM50224_TM50236_TM50251	D02	0	951849	451849	-0.0005	3.1083	3.8104	0.0255
LP16-8	FASTmrMLM	TM56492	TM56492_TM56499_TM56500	D04	46870404	47961105	47370404	0.0028	4.0567	4.8111	0.5728
LP16-8	FASTmrEMMA	TM49426	TM49426	D01	44660371	45660371	45160371	-0.0146	3.5333	4.2604	2.0078
LP16-8	pLARmEB	TM3949	TM3949	A02	3208946	4208946	3708946	0.0001	4.5095	5.2849	0.0015
LP16-8	pLARmEB	TM19408	TM19408	A07	19144706	20144706	19644706	-0.0183	4.5384	5.3151	8.745
LP16-8	pLARmEB	TM33837	TM33830_TM33837	A10	1180168	2372780	1872780	4.3396e-05	3.9427	4.6914	3.7223e-05
LP16-8	pLARmEB	TM35324	TM35324	A10	62187755	63187755	62687755	9.3609e-05	3.0432	3.7412	0.0005
LP16-8	pLARmEB	TM36876	TM36876_TM36880_TM36885	A10	99596949	100696471	100096949	-5.1686e-05	3.8736	4.6188	3.9186e-05
LP16-8	pLARmEB	TM37195	TM37195_TM37196	A11	5747892	6757471	6247892	1.2519e-05	6.2845	7.127	1.107e-05
LP16-8	pLARmEB	TM37356	TM37356	A11	11944979	12944979	12444979	-0.0005	3.5874	4.3175	0.0147
LP16-8	pLARmEB	TM43583	TM43583	A13	10182042	11182042	10682042	-7.3533e-05	3.9863	4.7372	0.0004
LP16-8	pLARmEB	TM50792	TM50792	D02	9596573	10596573	10096573	0.0018	3.6266	4.3588	0.1713
LP16-8	pLARmEB	TM53654	TM53654	D03	5404291	6404291	5904291	-0.0022	4.6225	5.4029	0.162
LP16-8	pLARmEB	TM55217	TM55206_TM55216_TM55217_TM55218_TM55223	D03	42299450	43529568	42973276	3.6393e-05	4.4407	5.213	6.451e-05
LP16-8	pLARmEB	TM55223	TM55206_TM55216_TM55217_TM55218_TM55223	D03	42299450	43529568	43029568	-7.2639e-05	5.3153	6.1238	0.0003
LP16-8	pLARmEB	TM55259	TM55259_TM55265	D03	43228082	44271208	43728082	0.0061	7.4008	8.2768	2.0403
LP16-8	pLARmEB	TM56851	TM56851_TM56852	D05	3723958	4797444	4223958	0.0008	8.4238	9.3265	0.0503
LP16-8	pLARmEB	TM58440	TM58440_TM58443	D05	52058747	53079953	52558747	0.0115	4.6593	5.4413	9.286
LP16-8	pLARmEB	TM58618	TM58618_TM58619_TM58623	D05	55502770	56578768	56002770	5.714e-05	6.915	7.777	0.0002
LP16-8	pLARmEB	TM58780	TM58766_TM58780	D05	59055865	60191907	59691907	7.896e-05	3.996	4.7474	0.0004
LP16-8	pLARmEB	TM58975	TM58957_TM58958_TM58975	D06	790825	1989688	1489688	0.0042	12.3054	13.2871	0.9666
LP16-8	pLARmEB	TM59013	TM59013_TM59026	D06	1256937	2365435	1756937	1.2688e-05	5.1283	5.9295	1.1454e-05
LP16-8	pLARmEB	TM63474	TM63474	D07	6115834	7115834	6615834	-0.0018	4.428	5.1998	0.2563
LP16-8	pLARmEB	TM70301	TM70301	D09	5775455	6775455	6275455	0.0001	4.3507	5.119	0.0003
LP16-8	pLARmEB	TM74748	TM74747_TM74748_TM74749_TM74751	D10	52796308	53819487	53298527	0.0161	3.3712	4.0891	6.6175
LP16-8	pLARmEB	TM79659	TM79659_TM79674	D12	52900022	54076561	53400022	-0.0001	3.131	3.8345	0.0009
LP16-8	pKWmEB	TM9520	TM9520	A04	42814015	43814015	43314015	0.0019	3.8998	4.6463	2.3548
LP16-8	pKWmEB	TM29895	TM29891_TM29894_TM29895	A08	100961561	102015914	101515914	-0.0011	3.8097	4.5516	3.0905
LP16-8	pKWmEB	TM53464	TM53464_TM53470	D03	1510083	2545335	2010083	0.001	3.4115	4.1317	4.8511
LP16-8	pKWmEB	TM72461	TM72461	D09	41141711	42141711	41641711	-0.0047	3.3684	4.0862	20.2461
LP16-8	ISIS EM-BLASSO	TM3181	TM3181_TM3182	A01	88385873	89509700	88885873	0.0115	3.4181	4.1387	3.5936
LP16-8	ISIS EM-BLASSO	TM3778	TM3778_TM3780_TM3782	A02	669766	1754691	1169766	0.0091	3.8761	4.6214	5.6676
LP16-8	ISIS EM-BLASSO	TM11628	TM11604_TM11618_TM11619_TM11620_TM11628_TM11629_TM11631	A05	32077816	33400112	32828410	-0.0037	4.5124	5.2879	1.1347
LP16-8	ISIS EM-BLASSO	TM14167	TM14167	A06	18708819	19708819	19208819	0.0152	3.2653	3.977	3.5348
LP16-8	ISIS EM-BLASSO	TM55259	TM55259_TM55265	D03	43228082	44271208	43728082	0.0062	3.333	4.0487	2.3192
LP16-8	ISIS EM-BLASSO	TM58443	TM58440_TM58443	D05	52058747	53079953	52579953	-0.0004	3.2433	3.9537	0.0134
LP16-8	ISIS EM-BLASSO	TM59049	TM59048_TM59049	D06	1600455	2624769	2124769	0.0055	3.4138	4.1342	1.4318
LP16-8	ISIS EM-BLASSO	TM64061	TM64033_TM64041_TM64043_TM64057_TM64061	D07	17945478	19273363	18773363	-0.007	4.7257	5.5105	4.1666
LP17-7	mrMLM	TM24664	TM24664	A08	38110555	39110555	38610555	0.0433	4.3966	5.16696	34.9126
LP17-7	mrMLM	TM43792	TM43792	A13	13916164	14916164	14416164	0.0085	3.0549	3.75366	2.9395
LP17-7	mrMLM	TM59575	TM59572_TM59574_TM59575	D06	9901257	10992651	10492651	0.0105	3.9367	4.68511	3.8784
LP17-7	FASTmrMLM	TM43792	TM43792	A13	13916164	14916164	14416164	0.0066	3.5081	4.2338	2.3961
LP17-7	FASTmrMLM	TM77868	TM77868	D12	10366242	11366242	10866242	0.0159	5.6576	6.4787	1.0161
LP17-7	FASTmrEMMA	TM38172	TM38172	A11	36793735	37793735	37293735	0.0219	3.5015	4.2269	6.4297
LP17-7	pLARmEB	TM5759	TM5759	A02	82038617	83038617	82538617	-0.0075	3.8118	4.5538	1.1075
LP17-7	pLARmEB	TM77868	TM77868	D12	10366242	11366242	10866242	0.0348	9.0991	10.0177	4.0915
LP17-7	pKWmEB	TM74004	TM74003_TM74004	D10	21783428	22832407	22332407	-0.0025	3.041	3.7389	6.1659
LP17-7	ISIS EM-BLASSO	TM40043	TM40012_TM40030_TM40043_TM40050_TM40054_TM40069	A12	302614	2043324	1154995	0.0155	5.0182	5.8151	5.3207
LP17-8	mrMLM	TM50414	TM50414	D02	1888544	2888544	2388544	-0.0301	3.9646	4.7144	8.4687
LP17-8	mrMLM	TM53255	TM53255_TM53259	D02	64257272	65283705	64757272	0.0132	3.6687	4.4032	3.8971
LP17-8	mrMLM	TM55223	TM55206_TM55216_TM55217_TM55218_TM55223	D03	42299450	43529568	43029568	-0.0264	3.2846	3.99744	15.4024
LP17-8	mrMLM	TM67282	TM67282_TM67284_TM67292	D08	6625530	7786657	7125530	-0.0215	3.1973	3.9049	4.1551
LP17-8	FASTmrMLM	TM10619	TM10611_TM10612_TM10619	A05	12316384	13382439	12882439	-0.0008	3.8755	4.6208	0.0067
LP17-8	FASTmrMLM	TM33940	TM33940	A10	4074232	5074232	4574232	-0.0077	5.4374	6.2505	1.6467
LP17-8	FASTmrMLM	TM42902	TM42899_TM42900_TM42902_TM42903_TM42912	A12	80601484	81817517	81182725	-0.0009	4.0361	4.7894	0.0072
LP17-8	FASTmrMLM	TM67284	TM67282_TM67284_TM67292	D08	6625530	7786657	7146156	0.0154	3.263	3.9746	2.4286
LP17-8	FASTmrMLM	TM79885	TM79885	D12	56856813	57856813	57356813	-0.0026	3.0877	3.7885	0.2098
LP17-8	FASTmrEMMA	TM36880	TM36876_TM36880_TM36885	A10	99596949	100696471	100147695	-0.0147	3.0638	3.7632	1.2897
LP17-8	FASTmrEMMA	TM50414	TM50414	D02	1888544	2888544	2388544	-2.524e-05	4.0449	4.7987	1.601e-06
LP17-8	FASTmrEMMA	TM53255	TM53255_TM53259	D02	64257272	65283705	64757272	0.0163	3.4814	4.2056	1.7162
LP17-8	pLARmEB	TM987	TM987	A01	19266345	20266345	19766345	0.0348	9.6025	10.5323	6.216
LP17-8	pLARmEB	TM3659	TM3659	A01	98585675	99585675	99085675	-1.9417e-05	3.0556	3.7544	9.9724e-06
LP17-8	pLARmEB	TM11199	TM11199	A05	26274844	27274844	26774844	-0.005	5.7423	6.5664	0.7477
LP17-8	pLARmEB	TM13226	TM13216_TM13226	A05	85239282	86381414	85881414	0.0006	4.0194	4.7719	0.0098
LP17-8	pLARmEB	TM19425	TM19425	A07	19962037	20962037	20462037	6.7001e-05	3.2414	3.9517	3.9576e-05
LP17-8	pLARmEB	TM46454	TM46454	A13	58640882	59640882	59140882	3.526e-05	4.4718	5.2455	3.2543e-05
LP17-8	pLARmEB	TM50414	TM50414	D02	1888544	2888544	2388544	-0.0224	4.2807	5.0457	4.084
LP17-8	pLARmEB	TM56821	TM56821	D05	2518287	3518287	3018287	0.0007	4.7805	5.5676	0.0042
LP17-8	pLARmEB	TM57480	TM57480_TM57483	D05	19486186	20522130	19986186	-0.0079	6.825	7.6843	1.5206
LP17-8	pLARmEB	TM63032	TM63032_TM63035	D06	61329622	62528883	61829622	0.0008	5.7657	6.5906	0.0097
LP17-8	pLARmEB	TM79885	TM79885	D12	56856813	57856813	57356813	-0.0037	6.4517	7.2995	0.3206
LP17-8	pKWmEB	TM11571	TM11571	A05	31781429	32781429	32281429	0.0275	3.3638	4.0813	10.2585
LP17-8	pKWmEB	TM42902	TM42899_TM42900_TM42902_TM42903_TM42912	A12	80601484	81817517	81182725	-0.0072	6.5468	7.3976	1.3791
LP17-8	pKWmEB	TM75069	TM75060_TM75069	D10	59443380	60613897	60113897	0.0002	3.5734	4.3027	3.63
LP17-8	pKWmEB	TM80324	TM80319_TM80324	D13	4489161	5635681	5135681	0.0313	3.0664	3.7659	15.2423
LP17-8	ISIS EM-BLASSO	TM7759	TM7759	A03	86360691	87360691	86860691	-0.0083	4.0146	4.7669	1.4569
LP17-8	ISIS EM-BLASSO	TM11163	TM11157_TM11163_TM11169	A05	24635142	25838414	25183759	-0.0098	7.3692	8.2443	3.4864
LP17-8	ISIS EM-BLASSO	TM11199	TM11199	A05	26274844	27274844	26774844	-0.0058	4.0664	4.8212	1.2483
LP17-8	ISIS EM-BLASSO	TM33701	TM33701	A09	72320989	73320989	72820989	-0.0105	3.5419	4.2695	1.3739
LP17-8	ISIS EM-BLASSO	TM53255	TM53255_TM53259	D02	64257272	65283705	64757272	0.0106	3.2587	3.97	2.7222
LP17-8	ISIS EM-BLASSO	TM57483	TM57480_TM57483	D05	19486186	20522130	20022130	-0.0057	4.5664	5.3443	0.9657
LP_BLUP-A	mrMLM	TM5303	TM5303	A02	74296905	75296905	74796905	-0.057	4.052	4.80612	14.7649
LP_BLUP-A	mrMLM	TM33533	TM33533_TM33538	A09	69063086	70092228	69563086	0.0313	4.9539	5.74817	17.1705
LP_BLUP-A	mrMLM	TM33795	TM33795_TM33806	A10	37840	1090331	537840	-0.0193	4.498	5.27291	5.532
LP_BLUP-A	mrMLM	TM55934	TM55934	D04	11019014	12019014	11519014	-0.0195	6.1591	6.99746	4.2428
LP_BLUP-A	mrMLM	TM56518	TM56518	D04	47439886	48439886	47939886	0.0126	3.3384	4.05441	3.2472
LP_BLUP-A	mrMLM	TM72530	TM72530	D09	42506712	43506712	43006712	0.0121	3.5069	4.23254	3.2959
LP_BLUP-A	mrMLM	TM74983	TM74983	D10	57014048	58014048	57514048	0.0206	6.4772	7.32583	5.7882
LP_BLUP-A	FASTmrMLM	TM3782	TM3778_TM3780_TM3782	A02	669766	1754691	1254691	0.0106	3.4858	4.2103	2.5203
LP_BLUP-A	FASTmrMLM	TM11728	TM11695_TM11705_TM11726_TM11728_TM11740	A05	34420081	35799312	35208113	-0.0144	5.1839	5.9873	4.672
LP_BLUP-A	FASTmrMLM	TM37355	TM37355	A11	11710731	12710731	12210731	-0.0022	3.6586	4.3926	0.126
LP_BLUP-A	FASTmrMLM	TM49209	TM49209	D01	43123507	44123507	43623507	0.0122	3.3473	4.0638	3.2835
LP_BLUP-A	FASTmrMLM	TM55934	TM55934	D04	11019014	12019014	11519014	-0.0132	7.0097	7.8745	2.3428
LP_BLUP-A	FASTmrMLM	TM56518	TM56518	D04	47439886	48439886	47939886	0.0028	3.6779	4.4129	0.1925
LP_BLUP-A	FASTmrMLM	TM74983	TM74983	D10	57014048	58014048	57514048	0.0124	4.2356	4.9985	2.5192
LP_BLUP-A	FASTmrEMMA	TM11728	TM11695_TM11705_TM11726_TM11728_TM11740	A05	34420081	35799312	35208113	-0.0274	4.128	4.8858	4.3694
LP_BLUP-A	FASTmrEMMA	TM49426	TM49426	D01	44660371	45660371	45160371	-0.0329	3.9423	4.6909	3.5807
LP_BLUP-A	FASTmrEMMA	TM55265	TM55259_TM55265	D03	43228082	44271208	43771208	0.0111	3.141	3.8452	0.9438
LP_BLUP-A	FASTmrEMMA	TM55934	TM55934	D04	11019014	12019014	11519014	-0.0214	3.0991	3.8006	1.637
LP_BLUP-A	pLARmEB	TM8390	TM8390_TM8393	A03	98664754	99702293	99164754	-0.0052	3.1021	3.8038	0.5165
LP_BLUP-A	pLARmEB	TM11618	TM11604_TM11618_TM11619_TM11620_TM11628_TM11629_TM11631	A05	32077816	33400112	32774515	-0.0161	3.0226	3.7193	6.2051
LP_BLUP-A	pLARmEB	TM11728	TM11695_TM11705_TM11726_TM11728_TM11740	A05	34420081	35799312	35208113	-0.0161	9.5136	10.4415	4.8293
LP_BLUP-A	pLARmEB	TM14167	TM14167	A06	18708819	19708819	19208819	0.0485	6.3928	7.2388	10.1503
LP_BLUP-A	pLARmEB	TM29891	TM29891_TM29894_TM29895	A08	100961561	102015914	101461561	0.0019	4.8625	5.653	0.0823
LP_BLUP-A	pLARmEB	TM37355	TM37355	A11	11710731	12710731	12210731	-0.0068	4.7183	5.5028	1.0286
LP_BLUP-A	pLARmEB	TM50792	TM50792	D02	9596573	10596573	10096573	0.0038	3.7185	4.4557	0.239
LP_BLUP-A	pLARmEB	TM55259	TM55259_TM55265	D03	43228082	44271208	43728082	0.009	4.395	5.1653	1.3629
LP_BLUP-A	pLARmEB	TM55934	TM55934	D04	11019014	12019014	11519014	-0.0115	4.1281	4.8859	1.4854
LP_BLUP-A	pLARmEB	TM56492	TM56492_TM56499_TM56500	D04	46870404	47961105	47370404	0.0187	4.5636	5.3414	7.1341
LP_BLUP-A	pLARmEB	TM64057	TM64033_TM64041_TM64043_TM64057_TM64061	D07	17945478	19273363	18729959	0.0199	4.5676	5.3456	9.3862
LP_BLUP-A	pLARmEB	TM69745	TM69714_TM69725_TM69745	D08	61100875	62321185	61821185	-0.0191	5.3864	6.1975	8.6299
LP_BLUP-A	pLARmEB	TM72530	TM72530	D09	42506712	43506712	43006712	0.0078	5.0108	5.8074	1.3889
LP_BLUP-A	pLARmEB	TM74748	TM74747_TM74748_TM74749_TM74751	D10	52796308	53819487	53298527	0.0068	3.4822	4.2065	0.3636
LP_BLUP-A	pLARmEB	TM74983	TM74983	D10	57014048	58014048	57514048	0.0125	4.0381	4.7915	2.1231
LP_BLUP-A	pLARmEB	TM77508	TM77508	D12	3243408	4243408	3743408	-0.0008	4.4307	5.2026	0.0107
LP_BLUP-A	pKWmEB	TM26184	TM26184	A08	51200826	52200826	51700826	-0.0069	3.4703	4.1939	40.64
LP_BLUP-A	pKWmEB	TM40069	TM40012_TM40030_TM40043_TM40050_TM40054_TM40069	A12	302614	2043324	1543324	0.0155	3.1729	3.879	2.716
LP_BLUP-A	pKWmEB	TM55934	TM55934	D04	11019014	12019014	11519014	-0.01	6.7872	7.6454	2.3514
LP_BLUP-A	ISIS EM-BLASSO	TM10876	TM10871_TM10876_TM10888	A05	19331450	20411731	19845285	-0.0028	3.3668	4.0845	0.1931
LP_BLUP-A	ISIS EM-BLASSO	TM55934	TM55934	D04	11019014	12019014	11519014	-0.0138	7.785	8.6714	2.7788
LP_BLUP-A	ISIS EM-BLASSO	TM69381	TM69381_TM69387	D08	57535175	58659701	58035175	0.009	6.4125	7.2591	1.8173
LP_BLUP-A	ISIS EM-BLASSO	TM72502	TM72502	D09	41968378	42968378	42468378	0.0098	4.0589	4.8134	2.9829
LP_BLUP-A	ISIS EM-BLASSO	TM80397	TM80397	D13	5713246	6713246	6213246	0.0065	3.242	3.9523	0.7659
LP_BLUP-A	ISIS EM-BLASSO	TM82168	TM82156_TM82168	D13	58492627	59589811	59089811	-0.0156	5.4208	6.2332	1.8016
LP_BLUP-B	mrMLM	TM28887	TM28887	A08	76895773	77895773	77395773	0.0067	3.0831	3.78364	4.6714
LP_BLUP-B	FASTmrMLM	TM1621	TM1621	A01	70018138	71018138	70518138	-0.0021	3.2737	3.9859	0.4307
LP_BLUP-B	FASTmrMLM	TM48166	TM48166	D01	6263937	7263937	6763937	-0.0031	5.5543	6.3717	0.5388
LP_BLUP-B	FASTmrMLM	TM55475	TM55475	D04	2126016	3126016	2626016	-0.0026	3.0246	3.7214	0.6071
LP_BLUP-B	FASTmrMLM	TM56326	TM56326	D04	42856502	43856502	43356502	0.0004	3.3903	4.1093	0.0078
LP_BLUP-B	FASTmrMLM	TM75015	TM75015_TM75016	D10	57727476	58732976	58227476	-0.0004	3.8302	4.5732	0.0124
LP_BLUP-B	FASTmrMLM	TM75016	TM75015_TM75016	D10	57727476	58732976	58232976	-0.0007	4.0556	4.8099	0.0322
LP_BLUP-B	FASTmrMLM	TM77635	TM77635_TM77641	D12	5107217	6136802	5607217	0.0002	4.9622	5.7568	0.0011
LP_BLUP-B	FASTmrMLM	TM78154	TM78154_TM78155	D12	20859912	21988548	21359912	-8.8951e-05	3.0446	3.7427	0.0007
LP_BLUP-B	FASTmrEMMA	TM5649	TM5646_TM5649_TM5662	A02	79997099	81187074	80521614	0.0011	3.0811	3.7815	0.013
LP_BLUP-B	FASTmrEMMA	TM48166	TM48166	D01	6263937	7263937	6763937	-0.002	3.3146	4.0292	0.0547
LP_BLUP-B	FASTmrEMMA	TM55265	TM55259_TM55265	D03	43228082	44271208	43771208	0.0084	3.1885	3.8956	1.7752
LP_BLUP-B	FASTmrEMMA	TM69745	TM69714_TM69725_TM69745	D08	61100875	62321185	61821185	-0.0001	4.3103	5.0768	7.8759e-05
LP_BLUP-B	pLARmEB	TM7197	TM7195_TM7197	A03	71943432	73125572	72625572	0.0091	3.8281	4.571	5.0358
LP_BLUP-B	pLARmEB	TM8393	TM8390_TM8393	A03	98664754	99702293	99202293	-0.0052	3.7783	4.5186	2.1146
LP_BLUP-B	pLARmEB	TM11628	TM11604_TM11618_TM11619_TM11620_TM11628_TM11629_TM11631	A05	32077816	33400112	32828410	-0.0048	10.4943	11.4426	1.7168
LP_BLUP-B	pLARmEB	TM28887	TM28887	A08	76895773	77895773	77395773	0.0055	5.1186	5.9195	2.3256
LP_BLUP-B	pLARmEB	TM32796	TM32787_TM32796	A09	52382479	53479963	52979963	-0.0045	3.1828	3.8895	1.5549
LP_BLUP-B	pLARmEB	TM48166	TM48166	D01	6263937	7263937	6763937	-0.0056	4.9633	5.7579	1.3367
LP_BLUP-B	pLARmEB	TM53613	TM53613	D03	3750153	4750153	4250153	2.2422e-05	3.0459	3.7441	1.6687e-05
LP_BLUP-B	pLARmEB	TM55216	TM55206_TM55216_TM55217_TM55218_TM55223	D03	42299450	43529568	42969311	0.0113	3.1558	3.8609	8.7366
LP_BLUP-B	pLARmEB	TM55475	TM55475	D04	2126016	3126016	2626016	-0.0038	5.2854	6.0927	0.9528
LP_BLUP-B	pLARmEB	TM56234	TM56221_TM56234	D04	39893473	41085916	40585916	0.0033	3.2599	3.9713	0.8518
LP_BLUP-B	pLARmEB	TM64043	TM64033_TM64041_TM64043_TM64057_TM64061	D07	17945478	19273363	18589259	-0.0066	4.1595	4.9188	3.3996
LP_BLUP-B	pLARmEB	TM69745	TM69714_TM69725_TM69745	D08	61100875	62321185	61821185	-0.0093	6.0393	6.8737	6.7353
LP_BLUP-B	pLARmEB	TM80416	TM80412_TM80414_TM80416	D13	7043336	8287560	7787560	0.0027	4.6246	5.4051	0.5689
LP_BLUP-B	pKWmEB	TM9520	TM9520	A04	42814015	43814015	43314015	0.0002	3.9003	4.6469	1.6243
LP_BLUP-B	pKWmEB	TM11631	TM11604_TM11618_TM11619_TM11620_TM11628_TM11629_TM11631	A05	32077816	33400112	32900112	0.0063	6.8984	7.7599	11.9409
LP_BLUP-B	pKWmEB	TM14157	TM14156_TM14157	A06	18141708	19252028	18752028	0.0348	7.2105	8.0811	15.3615
LP_BLUP-B	pKWmEB	TM31767	TM31767	A09	42492999	43492999	42992999	-0.0023	4.3134	5.0799	3.3818
LP_BLUP-B	pKWmEB	TM33538	TM33533_TM33538	A09	69063086	70092228	69592228	-0.0014	5.2794	6.0865	1.2592
LP_BLUP-B	pKWmEB	TM37264	TM37264	A11	7450701	8450701	7950701	-0.0069	3.2005	3.9083	6.0858
LP_BLUP-B	ISIS EM-BLASSO	TM3628	TM3626_TM3628	A01	98022877	99034245	98534245	-0.0045	3.9136	4.6608	2.0058
LP_BLUP-B	ISIS EM-BLASSO	TM11705	TM11695_TM11705_TM11726_TM11728_TM11740	A05	34420081	35799312	35036123	-0.0067	3.7614	4.5008	3.7223
LP_BLUP-B	ISIS EM-BLASSO	TM28887	TM28887	A08	76895773	77895773	77395773	0.0053	4.9845	5.78	2.8323
LP_BLUP-B	ISIS EM-BLASSO	TM36876	TM36876_TM36880_TM36885	A10	99596949	100696471	100096949	-0.0263	3.2497	3.9605	13.3357
LP_BLUP-B	ISIS EM-BLASSO	TM56534	TM56532_TM56533_TM56534	D04	47662105	48677501	48177501	0.0062	5.8077	6.6341	3.7625
LP_BLUP-C	mrMLM	TM11620	TM11604_TM11618_TM11619_TM11620_TM11628_TM11629_TM11631	A05	32077816	33400112	32783353	0.019	3.5542	4.28247	9.2202
LP_BLUP-C	mrMLM	TM28887	TM28887	A08	76895773	77895773	77395773	0.01	3.5897	4.31992	2.5622
LP_BLUP-C	mrMLM	TM30335	TM30335	A09	5748755	6748755	6248755	-0.0115	4.5187	5.29453	3.3749
LP_BLUP-C	mrMLM	TM36876	TM36876_TM36880_TM36885	A10	99596949	100696471	100096949	-0.0472	4.4955	5.2703	10.9203
LP_BLUP-C	mrMLM	TM37264	TM37264	A11	7450701	8450701	7950701	-0.0105	4.0931	4.84923	2.7009
LP_BLUP-C	mrMLM	TM42912	TM42899_TM42900_TM42902_TM42903_TM42912	A12	80601484	81817517	81317517	0.0123	5.7621	6.58691	3.8614
LP_BLUP-C	mrMLM	TM42627	TM42627	A12	74416613	75416613	74916613	-0.0242	5.1942	5.99801	14.6988
LP_BLUP-C	mrMLM	TM54702	TM54702	D03	29272914	30272914	29772914	-0.0121	3.8315	4.57455	3.0358
LP_BLUP-C	mrMLM	TM69745	TM69714_TM69725_TM69745	D08	61100875	62321185	61821185	-0.0218	4.8606	5.65104	12.0495
LP_BLUP-C	FASTmrMLM	TM11620	TM11604_TM11618_TM11619_TM11620_TM11628_TM11629_TM11631	A05	32077816	33400112	32783353	0.0149	4.6535	5.4352	7.049
LP_BLUP-C	FASTmrMLM	TM14167	TM14167	A06	18708819	19708819	19208819	0.0391	5.6653	6.4867	8.8415
LP_BLUP-C	FASTmrMLM	TM28887	TM28887	A08	76895773	77895773	77395773	0.0081	3.1357	3.8395	2.0927
LP_BLUP-C	FASTmrMLM	TM36876	TM36876_TM36880_TM36885	A10	99596949	100696471	100096949	-0.0329	3.3371	4.053	6.6453
LP_BLUP-C	FASTmrMLM	TM37264	TM37264	A11	7450701	8450701	7950701	-0.007	3.1064	3.8084	1.4828
LP_BLUP-C	FASTmrMLM	TM42912	TM42899_TM42900_TM42902_TM42903_TM42912	A12	80601484	81817517	81317517	0.0022	5.143	5.9448	0.1577
LP_BLUP-C	FASTmrMLM	TM48157	TM48157	D01	5851758	6851758	6351758	0.0027	3.6407	4.3737	0.2348
LP_BLUP-C	FASTmrMLM	TM69745	TM69714_TM69725_TM69745	D08	61100875	62321185	61821185	-0.0166	8.0025	8.8946	8.8028
LP_BLUP-C	FASTmrMLM	TM80165	TM80159_TM80160_TM80162_TM80165_TM80171_TM80180	D13	2090468	3399108	2658816	0.0019	3.6456	4.3789	0.0903
LP_BLUP-C	pLARmEB	TM9965	TM9965	A05	355523	1355523	855523	-0.0319	5.9351	6.7659	6.8811
LP_BLUP-C	pLARmEB	TM10527	TM10527_TM10530	A05	10598699	11642306	11098699	4.4825e-05	3.3805	4.099	5.0368e-05
LP_BLUP-C	pLARmEB	TM11620	TM11604_TM11618_TM11619_TM11620_TM11628_TM11629_TM11631	A05	32077816	33400112	32783353	0.0115	4.26	5.0241	3.9792
LP_BLUP-C	pLARmEB	TM14167	TM14167	A06	18708819	19708819	19208819	0.0493	8.3632	9.2644	13.1961
LP_BLUP-C	pLARmEB	TM30233	TM30233	A09	4376815	5376815	4876815	0.0147	3.5854	4.3154	6.4519
LP_BLUP-C	pLARmEB	TM37360	TM37360_TM37362	A11	12149360	13162837	12649360	-6.0074e-05	3.1285	3.8319	0.0001
LP_BLUP-C	pLARmEB	TM42489	TM42489_TM42492_TM42499_TM42509	A12	72447838	73611670	72947838	-0.0084	4.5619	5.3396	1.0515
LP_BLUP-C	pLARmEB	TM42627	TM42627	A12	74416613	75416613	74916613	-0.0134	5.3645	6.1748	5.3373
LP_BLUP-C	pLARmEB	TM42899	TM42899_TM42900_TM42902_TM42903_TM42912	A12	80601484	81817517	81101484	0.0078	5.9666	6.7985	1.4887
LP_BLUP-C	pLARmEB	TM53654	TM53654	D03	5404291	6404291	5904291	-0.01	4.7987	5.5866	1.2973
LP_BLUP-C	pLARmEB	TM55870	TM55870_TM55876	D04	8587346	9695147	9087346	0.0086	3.5499	4.2779	0.8936
LP_BLUP-C	pLARmEB	TM56500	TM56492_TM56499_TM56500	D04	46870404	47961105	47461105	-0.0145	4.8926	5.6844	5.3968
LP_BLUP-C	pLARmEB	TM69745	TM69714_TM69725_TM69745	D08	61100875	62321185	61821185	-0.0171	5.8944	6.7238	8.7421
LP_BLUP-C	pKWmEB	TM3181	TM3181_TM3182	A01	88385873	89509700	88885873	0.0177	5.8567	6.6848	6.4321
LP_BLUP-C	pKWmEB	TM6385	TM6385_TM6386	A03	8580253	9597740	9080253	0.016	3.1026	3.8044	3.5792
LP_BLUP-C	pKWmEB	TM18495	TM18490_TM18495	A06	102025357	103115392	102615392	0.0108	4.3714	5.1406	5.5212
LP_BLUP-C	pKWmEB	TM37955	TM37937_TM37955_TM37957_TM37958	A11	21573281	22717251	22196896	0.0085	3.1214	3.8243	5.1644
LP_BLUP-C	ISIS EM-BLASSO	TM11266	TM11266	A05	27452729	28452729	27952729	-0.0522	11.4907	12.4579	17.3146
LP_BLUP-C	ISIS EM-BLASSO	TM11631	TM11604_TM11618_TM11619_TM11620_TM11628_TM11629_TM11631	A05	32077816	33400112	32900112	0.0158	5.8344	6.6617	6.2267
LP_BLUP-C	ISIS EM-BLASSO	TM19955	TM19933_TM19941_TM19955	A07	25385664	26569342	26069342	0.007	3.8288	4.5717	1.1206
LP_BLUP-C	ISIS EM-BLASSO	TM28868	TM28868	A08	76501027	77501027	77001027	-0.0456	6.179	7.018	7.7707
LP_BLUP-C	ISIS EM-BLASSO	TM33890	TM33887_TM33890	A10	2747228	3783357	3283357	0.016	7.4267	8.3034	2.3775
LP_BLUP-C	ISIS EM-BLASSO	TM36654	TM36654	A10	95998883	96998883	96498883	-0.0118	3.3345	4.0503	1.2958
LP_BLUP-C	ISIS EM-BLASSO	TM36876	TM36876_TM36880_TM36885	A10	99596949	100696471	100096949	-0.0366	3.5626	4.2913	6.5881
LP_BLUP-C	ISIS EM-BLASSO	TM56751	TM56751	D05	1039506	2039506	1539506	0.014	4.108	4.8648	1.9134
LP_BLUP-C	ISIS EM-BLASSO	TM63262	TM63262	D07	2454571	3454571	2954571	0.014	6.8215	7.6807	3.0079
LP_BLUP-C	ISIS EM-BLASSO	TM69745	TM69714_TM69725_TM69745	D08	61100875	62321185	61821185	-0.0194	9.3712	10.296	9.6318
LP_BLUP-C	ISIS EM-BLASSO	TM80111	TM80111	D13	1380602	2380602	1880602	-0.0121	4.6069	5.3866	1.2147
LP_BLUP-C	ISIS EM-BLASSO	TM82168	TM82156_TM82168	D13	58492627	59589811	59089811	-0.0172	4.5435	5.3204	1.7853
LP_BLUP-D	mrMLM	TM11620	TM11604_TM11618_TM11619_TM11620_TM11628_TM11629_TM11631	A05	32077816	33400112	32783353	0.0296	6.2514	7.09279	20.6195
LP_BLUP-D	mrMLM	TM21134	TM21119_TM21134	A07	70056827	71176245	70676245	0.0219	4.8869	5.67843	3.0561
LP_BLUP-D	mrMLM	TM33588	TM33585_TM33588	A09	69522287	70537577	70037577	0.0191	4.4226	5.19414	3.8724
LP_BLUP-D	mrMLM	TM50414	TM50414	D02	1888544	2888544	2388544	-0.028	4.9345	5.72798	4.9896
LP_BLUP-D	mrMLM	TM55223	TM55206_TM55216_TM55217_TM55218_TM55223	D03	42299450	43529568	43029568	-0.0282	3.3823	4.10086	11.9612
LP_BLUP-D	mrMLM	TM59623	TM59598_TM59615_TM59623	D06	10246630	11537472	11037472	0.0142	5.1183	5.91914	3.8535
LP_BLUP-D	mrMLM	TM59680	TM59680	D06	11465990	12465990	11965990	-0.049	3.3473	4.06383	7.6056
LP_BLUP-D	mrMLM	TM79137	TM79137	D12	43820386	44820386	44320386	-0.0201	3.4155	4.13597	1.5041
LP_BLUP-D	FASTmrMLM	TM21334	TM21334	A07	71887567	72887567	72387567	-0.0538	3.6265	4.3587	10.881
LP_BLUP-D	FASTmrMLM	TM50414	TM50414	D02	1888544	2888544	2388544	-0.0207	4.8498	5.6398	2.9655
LP_BLUP-D	FASTmrMLM	TM55223	TM55206_TM55216_TM55217_TM55218_TM55223	D03	42299450	43529568	43029568	-0.0253	4.5785	5.357	10.4753
LP_BLUP-D	FASTmrMLM	TM58387	TM58387	D05	50862718	51862718	51362718	0.0239	4.4017	5.1723	14.5678
LP_BLUP-D	FASTmrMLM	TM58957	TM58957_TM58958_TM58975	D06	790825	1989688	1290825	-2.7035e-05	3.3904	4.1094	4.2442e-06
LP_BLUP-D	FASTmrMLM	TM59026	TM59013_TM59026	D06	1256937	2365435	1865435	0.0123	4.7613	5.5476	3.1535
LP_BLUP-D	FASTmrEMMA	TM33588	TM33585_TM33588	A09	69522287	70537577	70037577	0.0007	3.0054	3.701	0.0018
LP_BLUP-D	pLARmEB	TM3626	TM3626_TM3628	A01	98022877	99034245	98522877	-0.0039	3.4755	4.1994	0.3491
LP_BLUP-D	pLARmEB	TM9835	TM9812_TM9817_TM9821_TM9835	A04	59735276	61056214	60556214	0.0001	3.2574	3.9686	0.0002
LP_BLUP-D	pLARmEB	TM11620	TM11604_TM11618_TM11619_TM11620_TM11628_TM11629_TM11631	A05	32077816	33400112	32783353	0.0182	6.9198	7.782	7.6729
LP_BLUP-D	pLARmEB	TM14167	TM14167	A06	18708819	19708819	19208819	0.0382	3.9381	4.6866	6.1251
LP_BLUP-D	pLARmEB	TM20079	TM20079	A07	27961025	28961025	28461025	0.004	4.1146	4.8718	0.3105
LP_BLUP-D	pLARmEB	TM21334	TM21334	A07	71887567	72887567	72387567	-0.0527	5.9043	6.7341	9.4167
LP_BLUP-D	pLARmEB	TM37355	TM37355	A11	11710731	12710731	12210731	-0.0055	6.9165	7.7786	0.6702
LP_BLUP-D	pLARmEB	TM42887	TM42887	A12	79704335	80704335	80204335	-0.0094	5.4505	6.264	1.0661
LP_BLUP-D	pLARmEB	TM50414	TM50414	D02	1888544	2888544	2388544	-0.0005	3.488	4.2126	0.0018
LP_BLUP-D	pLARmEB	TM55223	TM55206_TM55216_TM55217_TM55218_TM55223	D03	42299450	43529568	43029568	-0.0244	3.8166	4.5589	8.834
LP_BLUP-D	pLARmEB	TM58425	TM58425	D05	51637337	52637337	52137337	0.0075	5.9272	6.7577	1.2694
LP_BLUP-D	pLARmEB	TM58651	TM58651	D05	56494355	57494355	56994355	0.0147	3.3339	4.0496	1.7178
LP_BLUP-D	pLARmEB	TM58957	TM58957_TM58958_TM58975	D06	790825	1989688	1290825	-0.0332	3.3824	4.101	5.779
LP_BLUP-D	pLARmEB	TM59574	TM59572_TM59574_TM59575	D06	9901257	10992651	10483374	0.014	6.3147	7.1581	3.6244
LP_BLUP-D	pLARmEB	TM79256	TM79255_TM79256	D12	47507978	48511753	48011753	-0.021	4.7558	5.5419	7.2926
LP_BLUP-D	pKWmEB	TM11620	TM11604_TM11618_TM11619_TM11620_TM11628_TM11629_TM11631	A05	32077816	33400112	32783353	0.0182	4.9528	5.747	12.2149
LP_BLUP-D	pKWmEB	TM30233	TM30233	A09	4376815	5376815	4876815	0.0182	3.6845	4.4198	16.5657
LP_BLUP-D	pKWmEB	TM40069	TM40012_TM40030_TM40043_TM40050_TM40054_TM40069	A12	302614	2043324	1543324	0.0166	4.4183	5.1896	4.2489
LP_BLUP-D	pKWmEB	TM53753	TM53753	D03	10361686	11361686	10861686	0.0134	3.992	4.7432	6.8902
LP_BLUP-D	pKWmEB	TM69769	TM69767_TM69769	D08	61889525	62984405	62484405	0.0015	4.266	5.0303	0.8522
LP_BLUP-D	ISIS EM-BLASSO	TM1621	TM1621	A01	70018138	71018138	70518138	-0.018	3.9896	4.7406	8.0497
LP_BLUP-D	ISIS EM-BLASSO	TM5628	TM5599_TM5616_TM5621_TM5628_TM5637	A02	79369316	80793655	80200610	0.0058	3.1747	3.8809	0.7404
LP_BLUP-D	ISIS EM-BLASSO	TM11620	TM11604_TM11618_TM11619_TM11620_TM11628_TM11629_TM11631	A05	32077816	33400112	32783353	0.0197	3.1771	3.8835	10.2265
LP_BLUP-D	ISIS EM-BLASSO	TM21334	TM21334	A07	71887567	72887567	72387567	-0.0289	3.0875	3.7883	3.221
LP_BLUP-D	ISIS EM-BLASSO	TM37264	TM37264	A11	7450701	8450701	7950701	-0.0087	4.0519	4.806	1.933
LP_BLUP-D	ISIS EM-BLASSO	TM50414	TM50414	D02	1888544	2888544	2388544	-0.0174	3.5884	4.3185	2.1607
LP_BLUP-D	ISIS EM-BLASSO	TM53417	TM53417_TM53419	D03	894357	1925231	1394357	-0.0279	4.9029	5.6951	6.2222
LP_BLUP-D	ISIS EM-BLASSO	TM57000	TM56979_TM56992_TM57000	D05	6048669	7280378	6780378	-0.0131	4.5127	5.2883	2.0035
LP_BLUP-D	ISIS EM-BLASSO	TM57432	TM57423_TM57432	D05	18573529	19709507	19209507	-0.0109	5.143	5.9448	2.0712
LP_BLUP-D	ISIS EM-BLASSO	TM58387	TM58387	D05	50862718	51862718	51362718	0.02	4.0513	4.8054	10.4656
LP_BLUP-D	ISIS EM-BLASSO	TM59574	TM59572_TM59574_TM59575	D06	9901257	10992651	10483374	0.0116	4.6114	5.3913	2.8372
LP_BLUP-D	ISIS EM-BLASSO	TM79256	TM79255_TM79256	D12	47507978	48511753	48011753	-0.0173	4.1459	4.9046	5.6245
BNPP16-1	FASTmrMLM	TM11169	TM11157_TM11163_TM11169	A05	24635142	25838414	25338414	0.2618	3.3759	4.0941	2.3689
BNPP16-1	FASTmrMLM	TM50043	TM50039_TM50040_TM50043	D01	56702872	57800770	57300770	0.2395	3.1918	3.8991	1.9758
BNPP16-1	FASTmrEMMA	TM37958	TM37937_TM37955_TM37957_TM37958	A11	21573281	22717251	22217251	0.8507	4.1729	4.9329	6.1843
BNPP16-1	pLARmEB	TM35376	TM35376	A10	65766242	66766242	66266242	-0.2777	3.0666	3.7661	1.4374
BNPP16-1	pLARmEB	TM37170	TM37170	A11	4742782	5742782	5242782	0.3606	4.5463	5.3233	3.7297
BNPP16-1	pLARmEB	TM52041	TM52041_TM52044	D02	48905207	50012158	49405207	1.3852	3.7426	4.481	7.6175
BNPP16-1	pLARmEB	TM78155	TM78154_TM78155	D12	20859912	21988548	21488548	-0.5857	3.9253	4.6731	8.3657
BNPP16-1	pKWmEB	TM10888	TM10871_TM10876_TM10888	A05	19331450	20411731	19911731	-0.7633	4.4465	5.2191	17.1732
BNPP16-1	pKWmEB	TM40631	TM40631	A12	11592104	12592104	12092104	-0.5212	3.7864	4.5271	11.9221
BNPP16-1	pKWmEB	TM52041	TM52041_TM52044	D02	48905207	50012158	49405207	1.2044	3.3914	4.1105	10.2133
BNPP16-1	pKWmEB	TM55362	TM55362	D03	46035142	47035142	46535142	0.3634	3.3398	4.0559	3.6047
BNPP16-1	ISIS EM-BLASSO	TM10888	TM10871_TM10876_TM10888	A05	19331450	20411731	19911731	-0.6322	3.1968	3.9044	10.5862
BNPP16-1	ISIS EM-BLASSO	TM37170	TM37170	A11	4742782	5742782	5242782	0.2891	3.2846	3.9974	2.5555
BNPP16-2	mrMLM	TM52041	TM52041_TM52044	D02	48905207	50012158	49405207	1.4688	3.4182	4.13882	17.0577
BNPP16-2	FASTmrEMMA	TM37958	TM37937_TM37955_TM37957_TM37958	A11	21573281	22717251	22217251	0.5836	5.1266	5.9277	5.5617
BNPP16-2	pLARmEB	TM37168	TM37168	A11	4500255	5500255	5000255	-0.303	5.3086	6.1168	4.9275
BNPP16-2	pLARmEB	TM52041	TM52041_TM52044	D02	48905207	50012158	49405207	1.2051	4.6869	5.47	10.7923
BNPP16-2	pLARmEB	TM58623	TM58618_TM58619_TM58623	D05	55502770	56578768	56078768	-0.3651	3.6951	4.431	4.7616
BNPP16-2	pLARmEB	TM73165	TM73165	D10	1547120	2547120	2047120	-0.1264	3.2841	3.9969	0.8774
BNPP16-2	pLARmEB	TM78152	TM78152	D12	20594896	21594896	21094896	-0.4572	3.6941	4.43	11.4906
BNPP16-2	pKWmEB	TM19528	TM19528	A07	20847354	21847354	21347354	0.4288	3.558	4.2865	16.6281
BNPP16-2	pKWmEB	TM30335	TM30335	A09	5748755	6748755	6248755	-0.2043	3.5091	4.2349	3.5943
BNPP16-2	pKWmEB	TM43002	TM43002	A12	83733507	84733507	84233507	-0.307	4.0469	4.8008	5.0972
BNPP16-2	pKWmEB	TM52041	TM52041_TM52044	D02	48905207	50012158	49405207	1.2729	4.5967	5.376	16.8
BNPP16-2	ISIS EM-BLASSO	TM3362	TM3362	A01	92758456	93758456	93258456	-0.4508	3.4858	4.2103	2.5549
BNPP16-2	ISIS EM-BLASSO	TM37170	TM37170	A11	4742782	5742782	5242782	0.2849	5.4639	6.2779	4.3815
BNPP16-2	ISIS EM-BLASSO	TM52041	TM52041_TM52044	D02	48905207	50012158	49405207	1.241	4.434	5.206	11.5116
BNPP16-2	ISIS EM-BLASSO	TM78152	TM78152	D12	20594896	21594896	21094896	-0.4801	4.8207	5.6095	12.7469
BNPP17-2	mrMLM	TM34064	TM34064	A10	10607869	11607869	11107869	1.4488	4.6181	5.39828	12.1308
BNPP17-2	mrMLM	TM47536	TM47536	A13	74909727	75909727	75409727	1.2802	3.0537	3.75238	14.4442
BNPP17-2	mrMLM	TM50224	TM50224_TM50236_TM50251	D02	0	951849	167901	-0.9579	3.5889	4.31907	13.7596
BNPP17-2	mrMLM	TM63332	TM63317_TM63332	D07	3491185	4607038	4107038	0.5523	4.1309	4.88885	5.0381
BNPP17-2	FASTmrMLM	TM8639	TM8639	A04	1987501	2987501	2487501	-1.1865	3.0793	3.7796	6.2995
BNPP17-2	FASTmrMLM	TM22400	TM22400	A08	9763587	10763587	10263587	-0.8724	4.34	5.1078	9.0315
BNPP17-2	FASTmrMLM	TM34064	TM34064	A10	10607869	11607869	11107869	1.4402	4.0004	4.752	14.1117
BNPP17-2	FASTmrEMMA	TM63332	TM63317_TM63332	D07	3491185	4607038	4107038	0.0002	4.1028	4.8594	1.9071e-07
BNPP17-2	pLARmEB	TM10445	TM10445	A05	8074046	9074046	8574046	-0.5799	3.4145	4.1349	2.1732
BNPP17-2	pLARmEB	TM47536	TM47536	A13	74909727	75909727	75409727	0.8631	3.4619	4.185	9.3458
BNPP17-2	pLARmEB	TM63332	TM63317_TM63332	D07	3491185	4607038	4107038	0.4201	3.9646	4.7144	4.1497
BNPP17-2	pKWmEB	TM18490	TM18490_TM18495	A06	102025357	103115392	102525357	-0.7146	3.597	4.3276	15.8047
BNPP17-2	pKWmEB	TM22400	TM22400	A08	9763587	10763587	10263587	-0.775	3.0202	3.7167	12.764
BNPP17-2	pKWmEB	TM63332	TM63317_TM63332	D07	3491185	4607038	4107038	0.3862	4.0524	4.8065	4.5695
BNPP17-2	ISIS EM-BLASSO	TM10445	TM10445	A05	8074046	9074046	8574046	-0.6602	3.7153	4.4523	2.4275
BNPP17-2	ISIS EM-BLASSO	TM10758	TM10758	A05	14865411	15865411	15365411	-0.4039	3.6574	4.3913	1.6438
BNPP17-2	ISIS EM-BLASSO	TM47536	TM47536	A13	74909727	75909727	75409727	1.0439	4.3015	5.0675	11.7835
BNPP17-2	ISIS EM-BLASSO	TM50224	TM50224_TM50236_TM50251	D02	0	951849	167901	-0.7482	4.4079	5.1788	10.2971
BNPP17-2	ISIS EM-BLASSO	TM69813	TM69813_TM69814	D08	63126263	64153155	63626263	-0.2684	3.0657	3.7651	1.4643
BNPP16-3	FASTmrEMMA	TM30155	TM30155	A09	3803981	4803981	4303981	1.1165	4.1037	4.8603	3.7763
BNPP16-3	pKWmEB	TM29006	TM29006	A08	81422809	82422809	81922809	-0.7691	5.9422	6.7733	8.7661
BNPP16-3	pKWmEB	TM37937	TM37937_TM37955_TM37957_TM37958	A11	21573281	22717251	22073281	0.4853	3.3285	4.0439	3.7153
BNPP16-3	pKWmEB	TM42833	TM42833	A12	78594860	79594860	79094860	-0.3385	3.4074	4.1274	3.0111
BNPP16-3	pKWmEB	TM54874	TM54874	D03	34549250	35549250	35049250	1.5435	3.7136	4.4505	15.4964
BNPP16-3	ISIS EM-BLASSO	TM29006	TM29006	A08	81422809	82422809	81922809	-0.9176	5.5428	6.3597	7.5441
BNPP16-3	ISIS EM-BLASSO	TM43080	TM43080_TM43083_TM43088	A12	85506686	86561258	86006686	0.4056	3.3521	4.0689	2.0764
BNPP16-3	ISIS EM-BLASSO	TM49610	TM49602_TM49610	D01	53723609	54771659	54271659	0.68	3.5383	4.2657	2.6263
BNPP16-4	FASTmrEMMA	TM5616	TM5599_TM5616_TM5621_TM5628_TM5637	A02	79369316	80793655	80050154	0.0003	3.0489	3.7472	5.9792e-07
BNPP16-4	FASTmrEMMA	TM30155	TM30155	A09	3803981	4803981	4303981	0.6899	4.8986	5.6906	4.3435
BNPP16-4	FASTmrEMMA	TM42833	TM42833	A12	78594860	79594860	79094860	-0.4398	3.3655	4.0831	2.2929
BNPP16-4	pKWmEB	TM30155	TM30155	A09	3803981	4803981	4303981	0.3129	3.5183	4.2446	5.2865
BNPP16-4	pKWmEB	TM42778	TM42778	A12	77561191	78561191	78061191	-0.2833	3.922	4.6697	5.0125
BNPP16-4	ISIS EM-BLASSO	TM30155	TM30155	A09	3803981	4803981	4303981	0.3139	3.6132	4.3447	3.5977
BNPP16-4	ISIS EM-BLASSO	TM42778	TM42778	A12	77561191	78561191	78061191	-0.3078	3.7107	4.4474	2.8379
BNPP17-3	mrMLM	TM36697	TM36697	A10	96901644	97901644	97401644	-0.7715	3.4476	4.1699	4.6632
BNPP17-3	mrMLM	TM55436	TM55436	D04	943537	1943537	1443537	-1.227	3.1543	3.85927	16.5736
BNPP17-3	FASTmrMLM	TM18393	TM18393	A06	100639939	101639939	101139939	-0.3783	3.2759	3.9882	1.9395
BNPP17-3	FASTmrMLM	TM36697	TM36697	A10	96901644	97901644	97401644	-0.6238	3.9094	4.6564	3.5069
BNPP17-3	FASTmrEMMA	TM66572	TM66566_TM66572	D07	49402490	50493298	49993298	-0.9464	3.1712	3.8773	2.6199
BNPP17-3	pKWmEB	TM36697	TM36697	A10	96901644	97901644	97401644	-0.6883	4.6356	5.4165	5.2575
BNPP17-3	pKWmEB	TM66572	TM66566_TM66572	D07	49402490	50493298	49993298	-0.5458	4.7395	5.5249	5.4493
BNPP17-3	ISIS EM-BLASSO	TM18393	TM18393	A06	100639939	101639939	101139939	-0.3895	3.7145	4.4514	1.8093
BNPP17-3	ISIS EM-BLASSO	TM36697	TM36697	A10	96901644	97901644	97401644	-0.7433	5.6867	6.5088	4.3833
BNPP17-3	ISIS EM-BLASSO	TM51669	TM51669	D02	26413130	27413130	26913130	-0.3579	3.2725	3.9846	1.742
BNPP17-3	ISIS EM-BLASSO	TM57349	TM57349	D05	16472758	17472758	16972758	-1.3918	4.0796	4.8351	17.6378
BNPP17-4	mrMLM	TM3856	TM3854_TM3856	A02	2060699	3077051	2577051	1.0724	3.1875	3.8945	8.5008
BNPP17-4	mrMLM	TM22123	TM22123	A08	5940781	6940781	6440781	0.4988	3.1493	3.85396	1.5789
BNPP17-4	mrMLM	TM40195	TM40159_TM40175_TM40195	A12	2566187	3910918	3410918	-1.1407	4.1596	4.91893	3.7008
BNPP17-4	mrMLM	TM40121	TM40103_TM40121_TM40122_TM40126	A12	1746817	2956719	2409308	1.7684	5.4332	6.2461	19.084
BNPP17-4	mrMLM	TM45805	TM45805	A13	48517622	49517622	49017622	1.3683	3.3082	4.02244	15.2482
BNPP17-4	FASTmrMLM	TM40122	TM40103_TM40121_TM40122_TM40126	A12	1746817	2956719	2423569	-1.2749	4.575	5.3533	12.0511
BNPP17-4	FASTmrMLM	TM40195	TM40159_TM40175_TM40195	A12	2566187	3910918	3410918	-0.9419	4.2289	4.9915	3.1294
BNPP17-4	FASTmrMLM	TM45805	TM45805	A13	48517622	49517622	49017622	1.0371	4.0626	4.8172	10.8646
BNPP17-4	pLARmEB	TM3856	TM3854_TM3856	A02	2060699	3077051	2577051	1.266	4.8147	5.6032	12.4691
BNPP17-4	pLARmEB	TM13412	TM13401_TM13412_TM13414	A05	89352928	90485386	89964259	-0.7035	3.6835	4.4188	6.857
BNPP17-4	pLARmEB	TM40122	TM40103_TM40121_TM40122_TM40126	A12	1746817	2956719	2423569	-1.3077	4.85	5.64	10.7626
BNPP17-4	pLARmEB	TM45805	TM45805	A13	48517622	49517622	49017622	1.0471	4.432	5.204	9.4004
BNPP17-4	pKWmEB	TM3856	TM3854_TM3856	A02	2060699	3077051	2577051	1.19	5.1926	5.9963	21.0056
BNPP17-4	pKWmEB	TM13180	TM13180	A05	83339023	84339023	83839023	-0.5792	3.833	4.5761	5.9035
BNPP17-4	pKWmEB	TM13412	TM13401_TM13412_TM13414	A05	89352928	90485386	89964259	-0.7315	4.0324	4.7856	12.9348
BNPP17-4	pKWmEB	TM73815	TM73815	D10	10095365	11095365	10595365	0.3711	3.9714	4.7215	3.8319
BNPP17-4	ISIS EM-BLASSO	TM3854	TM3854_TM3856	A02	2060699	3077051	2560699	-0.5182	3.9429	4.6916	2.7828
BNPP17-4	ISIS EM-BLASSO	TM13414	TM13401_TM13412_TM13414	A05	89352928	90485386	89985386	-0.3547	3.6495	4.383	2.0611
BNPP17-4	ISIS EM-BLASSO	TM40103	TM40103_TM40121_TM40122_TM40126	A12	1746817	2956719	2246817	0.462	3.2247	3.934	1.7993
BNPP17-4	ISIS EM-BLASSO	TM45805	TM45805	A13	48517622	49517622	49017622	0.7489	3.0872	3.788	6.3095
BNPP16-5	mrMLM	TM9950	TM9950	A04	61688870	62688870	62188870	0.5337	4.3201	5.08696	6.2458
BNPP16-5	mrMLM	TM57620	TM57617_TM57620	D05	24003566	25106287	24606287	-1.056	4.9259	5.71903	7.341
BNPP16-5	FASTmrMLM	TM9950	TM9950	A04	61688870	62688870	62188870	0.4194	3.6831	4.4184	3.9857
BNPP16-5	FASTmrMLM	TM57620	TM57617_TM57620	D05	24003566	25106287	24606287	-0.8517	4.2689	5.0334	4.9331
BNPP16-5	FASTmrEMMA	TM80061	TM80061	D13	678436	1678436	1178436	0.7892	3.0351	3.7326	2.3624
BNPP16-5	pLARmEB	TM9950	TM9950	A04	61688870	62688870	62188870	0.4198	4.3853	5.1551	3.6764
BNPP16-5	pLARmEB	TM57620	TM57617_TM57620	D05	24003566	25106287	24606287	-0.8521	4.5493	5.3265	4.5473
BNPP16-5	pKWmEB	TM9950	TM9950	A04	61688870	62688870	62188870	0.3759	3.9011	4.6477	4.845
BNPP16-5	pKWmEB	TM57620	TM57617_TM57620	D05	24003566	25106287	24606287	-0.7741	6.642	7.4958	7.4402
BNPP16-5	pKWmEB	TM75782	TM75782	D11	11801287	12801287	12301287	0.0004	3.5934	4.3238	12.0363
BNPP16-5	ISIS EM-BLASSO	TM5436	TM5436	A02	75655795	76655795	76155795	0.6881	3.8284	4.5713	0.9592
BNPP16-5	ISIS EM-BLASSO	TM57620	TM57617_TM57620	D05	24003566	25106287	24606287	-0.8644	5.5787	6.3969	5.0913
BNPP16-5	ISIS EM-BLASSO	TM80061	TM80061	D13	678436	1678436	1178436	0.3582	3.0359	3.7335	2.0485
BNPP16-6	mrMLM	TM36590	TM36590	A10	94896721	95896721	95396721	-0.6184	3.2173	3.92611	4.6406
BNPP16-6	mrMLM	TM57620	TM57617_TM57620	D05	24003566	25106287	24606287	-1.0662	5.4602	6.2741	7.9391
BNPP16-6	FASTmrMLM	TM36590	TM36590	A10	94896721	95896721	95396721	-0.4298	3.2609	3.9723	2.2697
BNPP16-6	FASTmrMLM	TM57620	TM57617_TM57620	D05	24003566	25106287	24606287	-0.8604	3.7153	4.4523	5.2347
BNPP16-6	pLARmEB	TM11511	TM11511	A05	30267974	31267974	30767974	1.085	3.2099	3.9183	6.4147
BNPP16-6	pLARmEB	TM74225	TM74225	D10	23814608	24814608	24314608	4.0055	5.8576	6.6857	13.9813
BNPP16-6	pKWmEB	TM57620	TM57617_TM57620	D05	24003566	25106287	24606287	-0.751	4.1507	4.9096	7.5049
BNPP16-6	ISIS EM-BLASSO	TM11511	TM11511	A05	30267974	31267974	30767974	1.1669	3.5557	4.284	8.8415
BNPP16-6	ISIS EM-BLASSO	TM57620	TM57617_TM57620	D05	24003566	25106287	24606287	-0.6567	3.37	4.0878	2.6111
BNPP16-6	ISIS EM-BLASSO	TM58619	TM58618_TM58619_TM58623	D05	55502770	56578768	56007213	-0.3777	4.0757	4.831	2.8957
BNPP16-6	ISIS EM-BLASSO	TM74225	TM74225	D10	23814608	24814608	24314608	3.5316	4.3614	5.1302	12.9533
BNPP17-5	FASTmrMLM	TM73803	TM73803	D10	9776620	10776620	10276620	-0.6597	4.5315	5.3079	9.177
BNPP17-5	pLARmEB	TM10833	TM10833	A05	19096794	20096794	19596794	-0.3573	4.7904	5.5779	2.591
BNPP17-5	pLARmEB	TM33118	TM33118	A09	62259341	63259341	62759341	-0.2881	3.7925	4.5335	1.7039
BNPP17-5	pKWmEB	TM73801	TM73801	D10	9514157	10514157	10014157	0.2396	3.4561	4.1789	5.057
BNPP17-5	ISIS EM-BLASSO	TM73801	TM73801	D10	9514157	10514157	10014157	0.3404	3.3949	4.1142	2.5444
BNPP17-6	mrMLM	TM81722	TM81722_TM81723	D13	49851004	50869969	50351004	-0.9033	4.1043	4.86097	5.3499
BNPP17-6	FASTmrMLM	TM81723	TM81722_TM81723	D13	49851004	50869969	50369969	-0.0002	3.7996	4.541	5.0765e-07
BNPP17-6	FASTmrEMMA	TM40054	TM40012_TM40030_TM40043_TM40050_TM40054_TM40069	A12	302614	2043324	1381521	0.7631	3.4649	4.1881	2.8166
BNPP17-6	FASTmrEMMA	TM47671	TM47671	A13	78292261	79292261	78792261	-0.7186	3.2724	3.9845	3.0481
BNPP17-6	pKWmEB	TM40054	TM40012_TM40030_TM40043_TM40050_TM40054_TM40069	A12	302614	2043324	1381521	0.3558	3.334	4.0498	4.3025
BNPP17-6	pKWmEB	TM81722	TM81722_TM81723	D13	49851004	50869969	50351004	-0.5616	3.0065	3.7022	3.604
BNPP17-6	pKWmEB	TM81471	TM81471	D13	45207863	46207863	45707863	-0.3325	3.3498	4.0665	5.4623
BNPP17-6	ISIS EM-BLASSO	TM9821	TM9812_TM9817_TM9821_TM9835	A04	59735276	61056214	60447634	-0.3629	4.4787	5.2528	2.9942
BNPP17-6	ISIS EM-BLASSO	TM13788	TM13788	A06	5391297	6391297	5891297	1.0939	3.2023	3.9102	7.6377
BNPP17-6	ISIS EM-BLASSO	TM40126	TM40103_TM40121_TM40122_TM40126	A12	1746817	2956719	2456719	-0.6993	4.0382	4.7916	3.2458
BNPP17-6	ISIS EM-BLASSO	TM58845	TM58845_TM58849_TM58866	D05	60991077	62200714	61491077	-0.3387	3.6503	4.3838	2.4509
BNPP17-6	ISIS EM-BLASSO	TM81722	TM81722_TM81723	D13	49851004	50869969	50351004	-0.8378	5.4163	6.2286	4.4805
BNPP16-7	mrMLM	TM57620	TM57617_TM57620	D05	24003566	25106287	24606287	-1.7077	4.1312	4.88917	7.178
BNPP16-7	FASTmrMLM	TM57620	TM57617_TM57620	D05	24003566	25106287	24606287	-1.2117	3.7329	4.4708	3.3476
BNPP16-7	FASTmrMLM	TM63306	TM63300_TM63306_TM63308	D07	2901093	3936525	3425583	2.8097	3.1986	3.9063	12.5765
BNPP16-7	pLARmEB	TM9593	TM9593	A04	53711830	54711830	54211830	-0.3932	3.0483	3.7466	0.9736
BNPP16-7	pLARmEB	TM33676	TM33676	A09	71649911	72649911	72149911	-0.3499	3.6975	4.4335	0.7485
BNPP16-7	pLARmEB	TM57620	TM57617_TM57620	D05	24003566	25106287	24606287	-1.0522	3.4458	4.168	2.0322
BNPP16-7	pLARmEB	TM63306	TM63300_TM63306_TM63308	D07	2901093	3936525	3425583	2.5917	3.2492	3.9599	8.6151
BNPP16-7	pLARmEB	TM73975	TM73975	D10	11930355	12930355	12430355	0.4598	3.2762	3.9885	1.1199
BNPP16-7	pLARmEB	TM74225	TM74225	D10	23814608	24814608	24314608	7.4914	6.7104	7.5663	17.6726
BNPP16-7	pKWmEB	TM57620	TM57617_TM57620	D05	24003566	25106287	24606287	-1.1437	3.3928	4.112	4.9666
BNPP16-7	pKWmEB	TM63306	TM63300_TM63306_TM63308	D07	2901093	3936525	3425583	2.5366	3.4124	4.1327	21.1333
BNPP16-7	ISIS EM-BLASSO	TM57620	TM57617_TM57620	D05	24003566	25106287	24606287	-1.0536	3.0355	3.733	2.528
BNPP16-7	ISIS EM-BLASSO	TM74225	TM74225	D10	23814608	24814608	24314608	5.8536	3.9909	4.742	13.3873
BNPP16-8	mrMLM	TM33914	TM33914	A10	3752031	4752031	4252031	-0.4405	3.6526	4.38623	5.6803
BNPP16-8	FASTmrMLM	TM33914	TM33914	A10	3752031	4752031	4252031	-0.3546	3.9533	4.7025	3.68
BNPP16-8	pKWmEB	TM33914	TM33914	A10	3752031	4752031	4252031	-0.3565	3.8218	4.5644	5.6855
BNPP16-8	ISIS EM-BLASSO	TM30338	TM30338	A09	5966170	6966170	6466170	0.4098	3.009	3.7048	6.3363
BNPP16-8	ISIS EM-BLASSO	TM33914	TM33914	A10	3752031	4752031	4252031	-0.3556	4.2255	4.988	3.6435
BNPP17-7	mrMLM	TM50124	TM50123_TM50124	D01	58628966	59631579	59131579	-0.6747	3.2036	3.91158	3.792
BNPP17-7	FASTmrMLM	TM50123	TM50123_TM50124	D01	58628966	59631579	59128966	0.9789	3.0053	3.7009	5.7606
BNPP17-7	FASTmrMLM	TM77843	TM77843	D12	9865428	10865428	10365428	-1.3046	3.3763	4.0945	10.6028
BNPP17-7	FASTmrEMMA	TM42492	TM42489_TM42492_TM42499_TM42509	A12	72447838	73611670	73002224	-0.7851	3.5582	4.2867	3.134
BNPP17-7	pLARmEB	TM42492	TM42489_TM42492_TM42499_TM42509	A12	72447838	73611670	73002224	-0.3796	3.5311	4.2581	2.8087
BNPP17-7	pLARmEB	TM77843	TM77843	D12	9865428	10865428	10365428	-1.1804	3.1857	3.8926	9.5837
BNPP17-7	pKWmEB	TM40030	TM40012_TM40030_TM40043_TM40050_TM40054_TM40069	A12	302614	2043324	966117	-0.9335	3.3326	4.0483	19.5991
BNPP17-7	pKWmEB	TM80403	TM80403	D13	6142034	7142034	6642034	-0.4872	3.7862	4.5269	4.4197
BNPP17-7	ISIS EM-BLASSO	TM10783	TM10783	A05	16247483	17247483	16747483	-0.339	3.6048	4.3358	1.8774
BNPP17-7	ISIS EM-BLASSO	TM46980	TM46980	A13	66867928	67867928	67367928	0.425	3.2101	3.9185	1.4846
BNPP17-7	ISIS EM-BLASSO	TM58907	TM58907	D06	288798	1288798	788798	-0.3967	3.5323	4.2594	1.5292
BNPP17-7	ISIS EM-BLASSO	TM69105	TM69105	D08	49778120	50778120	50278120	0.5271	3.1208	3.8237	6.1032
BNPP17-8	mrMLM	TM66785	TM66782_TM66785	D07	53726090	54801266	54301266	1.5621	4.7205	5.50507	24.5332
BNPP17-8	FASTmrMLM	TM66782	TM66782_TM66785	D07	53726090	54801266	54226090	-0.7977	5.1914	5.9951	7.874
BNPP17-8	pLARmEB	TM66782	TM66782_TM66785	D07	53726090	54801266	54226090	-0.7538	4.8855	5.677	6.1168
BNPP17-8	pLARmEB	TM72911	TM72911	D09	48098570	49098570	48598570	-0.4378	3.5392	4.2666	2.9993
BNPP17-8	pKWmEB	TM66782	TM66782_TM66785	D07	53726090	54801266	54226090	-0.6277	4.9329	5.7263	8.3405
BNPP17-8	pKWmEB	TM69488	TM69482_TM69488	D08	58374866	59421452	58921452	0.3705	3.7883	4.5291	3.3952
BNPP17-8	pKWmEB	TM72911	TM72911	D09	48098570	49098570	48598570	-0.4233	4.1119	4.8689	5.7283
BNPP17-8	ISIS EM-BLASSO	TM58766	TM58766_TM58780	D05	59055865	60191907	59555865	0.2084	3.39	4.109	1.3245
BNPP17-8	ISIS EM-BLASSO	TM69488	TM69482_TM69488	D08	58374866	59421452	58921452	0.307	3.0771	3.7773	1.702
BNPP_BLUP-A	FASTmrEMMA	TM37958	TM37937_TM37955_TM37957_TM37958	A11	21573281	22717251	22217251	6.0713e-05	4.1804	4.9407	5.3502e-08
BNPP_BLUP-A	FASTmrEMMA	TM58619	TM58618_TM58619_TM58623	D05	55502770	56578768	56007213	-0.0002	3.0913	3.7923	4.2644e-07
BNPP_BLUP-A	pLARmEB	TM37386	TM37386	A11	13868181	14868181	14368181	-0.2988	3.9405	4.6891	3.3894
BNPP_BLUP-A	pLARmEB	TM57914	TM57884_TM57914	D05	29830121	31015705	30515705	-0.6242	3.7329	4.4708	9.4673
BNPP_BLUP-A	ISIS EM-BLASSO	TM10871	TM10871_TM10876_TM10888	A05	19331450	20411731	19831450	-0.211	3.0016	3.697	2.1245
BNPP_BLUP-A	ISIS EM-BLASSO	TM37958	TM37937_TM37955_TM37957_TM37958	A11	21573281	22717251	22217251	0.2631	3.0363	3.7339	4.1286
BNPP_BLUP-B	mrMLM	TM29006	TM29006	A08	81422809	82422809	81922809	-0.7524	3.927	4.67492	7.6141
BNPP_BLUP-B	FASTmrEMMA	TM29006	TM29006	A08	81422809	82422809	81922809	-1.1902	3.8351	4.5783	4.5446
BNPP_BLUP-B	pLARmEB	TM53229	TM53229	D02	63968744	64968744	64468744	-0.41	3.1646	3.8702	1.8742
BNPP_BLUP-B	pLARmEB	TM68811	TM68811	D08	43184854	44184854	43684854	-0.6821	5.7163	6.5395	5.889
BNPP_BLUP-B	pKWmEB	TM34033	TM34033	A10	7332712	8332712	7832712	-0.3722	3.8958	4.6421	3.2564
BNPP_BLUP-B	pKWmEB	TM47329	TM47329	A13	71675646	72675646	72175646	-0.325	4.1856	4.9462	3.4128
BNPP_BLUP-B	pKWmEB	TM49994	TM49970_TM49994	D01	56233771	57363661	56863661	-0.4384	3.2804	3.993	4.2668
BNPP_BLUP-B	pKWmEB	TM53229	TM53229	D02	63968744	64968744	64468744	-0.4618	4.1517	4.9106	5.3297
BNPP_BLUP-B	pKWmEB	TM56518	TM56518	D04	47439886	48439886	47939886	-0.0003	3.4966	4.2217	3.2996
BNPP_BLUP-B	pKWmEB	TM68811	TM68811	D08	43184854	44184854	43684854	-0.6708	7.7195	8.6041	10.9727
BNPP_BLUP-B	ISIS EM-BLASSO	TM11695	TM11695_TM11705_TM11726_TM11728_TM11740	A05	34420081	35799312	34920081	-0.8528	3.3404	4.0565	6.1616
BNPP_BLUP-B	ISIS EM-BLASSO	TM29006	TM29006	A08	81422809	82422809	81922809	-0.7105	4.6387	5.4198	6.063
BNPP_BLUP-B	ISIS EM-BLASSO	TM40195	TM40159_TM40175_TM40195	A12	2566187	3910918	3410918	-0.9969	5.6973	6.5198	4.5926
BNPP_BLUP-B	ISIS EM-BLASSO	TM54417	TM54417_TM54429	D03	25216956	26323780	25716956	-1.161	3.3474	4.0639	7.1944
BNPP_BLUP-C	FASTmrEMMA	TM57620	TM57617_TM57620	D05	24003566	25106287	24606287	-1.1625e-05	3.4763	4.2002	3.0058e-10
BNPP_BLUP-C	pLARmEB	TM48284	TM48284	D01	8357917	9357917	8857917	-0.2153	3.1207	3.8236	1.2942
BNPP_BLUP-C	pLARmEB	TM63306	TM63300_TM63306_TM63308	D07	2901093	3936525	3425583	1.2049	3.0105	3.7064	8.4185
BNPP_BLUP-C	pLARmEB	TM74225	TM74225	D10	23814608	24814608	24314608	2.9577	4.0961	4.8524	12.4554
BNPP_BLUP-C	pKWmEB	TM57620	TM57617_TM57620	D05	24003566	25106287	24606287	-0.6158	3.5066	4.2322	4.5548
BNPP_BLUP-C	pKWmEB	TM63306	TM63300_TM63306_TM63308	D07	2901093	3936525	3425583	1.1578	3.8131	4.5552	17.4838
BNPP_BLUP-C	ISIS EM-BLASSO	TM32931	TM32926_TM32931	A09	54658182	55785591	55285591	-1.9371	3.7311	4.4689	8.0471
BNPP_BLUP-C	ISIS EM-BLASSO	TM48284	TM48284	D01	8357917	9357917	8857917	-0.266	3.2022	3.9101	1.7166
BNPP_BLUP-C	ISIS EM-BLASSO	TM74225	TM74225	D10	23814608	24814608	24314608	4.1031	7.5778	8.4586	20.8308
BNPP_BLUP-D	mrMLM	TM13205	TM13205	A05	84043526	85043526	84543526	-0.7228	4.6251	5.40558	19.95
BNPP_BLUP-D	mrMLM	TM21795	TM21795	A08	355803	1355803	855803	-0.3093	3.5723	4.30156	3.6851
BNPP_BLUP-D	FASTmrMLM	TM13205	TM13205	A05	84043526	85043526	84543526	-0.6573	5.7694	6.5945	14.7125
BNPP_BLUP-D	FASTmrMLM	TM21795	TM21795	A08	355803	1355803	855803	-0.2864	5.7289	6.5525	2.8167
BNPP_BLUP-D	FASTmrMLM	TM70521	TM70521	D09	11488475	12488475	11988475	-1.425	5.2702	6.0769	12.3504
BNPP_BLUP-D	pLARmEB	TM18521	TM18521_TM18525	A07	828962	1866501	1328962	0.343	5.857	6.6851	2.6041
BNPP_BLUP-D	pLARmEB	TM21334	TM21334	A07	71887567	72887567	72387567	-0.7916	3.5325	4.2596	2.938
BNPP_BLUP-D	pLARmEB	TM39459	TM39459	A11	83480326	84480326	83980326	-0.5559	3.9822	4.7329	9.8916
BNPP_BLUP-D	pLARmEB	TM63032	TM63032_TM63035	D06	61329622	62528883	61829622	-0.5975	3.7446	4.4831	6.492
BNPP_BLUP-D	pLARmEB	TM69926	TM69926	D09	319901	1319901	819901	0.3109	6.7815	7.6395	2.9323
BNPP_BLUP-D	pLARmEB	TM70111	TM70111	D09	2174466	3174466	2674466	-0.2343	4.5591	5.3367	1.6854
BNPP_BLUP-D	pLARmEB	TM72330	TM72330	D09	39401937	40401937	39901937	-0.3114	5.3357	6.1449	2.057
BNPP_BLUP-D	pLARmEB	TM73152	TM73152_TM73154	D10	1152035	2229717	1652035	0.2683	6.5315	7.3818	2.2837
BNPP_BLUP-D	pLARmEB	TM74225	TM74225	D10	23814608	24814608	24314608	2.5801	6.0153	6.8488	10.6791
BNPP_BLUP-D	pLARmEB	TM75304	TM75304	D11	1520374	2520374	2020374	-0.4158	5.4126	6.2247	2.609
BNPP_BLUP-D	pKWmEB	TM13205	TM13205	A05	84043526	85043526	84543526	-0.5295	4.2405	5.0037	20.4061
BNPP_BLUP-D	pKWmEB	TM33864	TM33864_TM33866_TM33870	A10	2245139	3441185	2745139	-0.2441	3.4806	4.2048	4.0566
BNPP_BLUP-D	ISIS EM-BLASSO	TM13205	TM13205	A05	84043526	85043526	84543526	-0.7021	5.2872	6.0946	16.7552
BNPP_BLUP-D	ISIS EM-BLASSO	TM21795	TM21795	A08	355803	1355803	855803	-0.3016	5.2555	6.0617	3.1191
BNPP_BLUP-D	ISIS EM-BLASSO	TM70521	TM70521	D09	11488475	12488475	11988475	-1.3727	5.3111	6.1194	11.4412
