# Supplementary material for: Genome-wide association reveals genetic variation of lint yield components under salty field conditions in cotton (Gossypium hirsutum L.)
Source: BMC Plant Biol. 2020 Jan 14;20:23. doi: 10.1186/s12870-019-2187-y (PMC6961271; doi:10.1186/s12870-019-2187-y)
Supplement: Supplementary file 15 — Additional file 15 Table S8. Expression pattern of 182 predominant expressed genes during fiber development in different tissues and organs. (XLSX 64 kb) [file 12870_2019_2187_MOESM15_ESM.xlsx]

## Sheet: Table S8
Table S8 Expression pattern of 182 predominant expressed genes during fiber development in different tissues and organs.
Gene_id	Arabidopsis ID	ArabDesc	symbol	root	stem	leaf	petal	torus	sepal	bract	anther	filament	pistil	-3DPA	0DPA	1DPA	3DPA	5DPA	10DPA_Ovule	15DPA_Ovule	20DPA_Ovule	25DPA_Ovule	10DPA_Fiber	15DPA_Fiber	20DPA_Fiber	25DPA_Fiber
Gh_A02G1469	AT4G37480	Chaperone DnaJ-domain superfamily protein	0	2.86468	4.13613	5.14063	8.365	4.30463	2.98872	3.44804	6.83239	5.84803	4.19973	3.52108	3.62085	3.5476	6.13707	7.01279	4.15529	7.61573	1.41874	10.2672	17.5574	11.8441	8.56395	8.67699
Gh_A11G1545	AT3G51500	0	0	13.9465	12.2883	7.98685	8.14579	8.73762	10.3918	8.20162	9.59461	11.7031	11.118	18.8711	13.0372	18.224	25.7908	25.4863	9.56597	12.5971	6.98449	27.3642	29.089	20.3648	10.4611	4.11663
Gh_A12G0098	AT4G35420	dihydroflavonol 4-reductase-like1	DRL1	0	0	0	0	0	0	0	0	0	0	0.0980305	0	0.215411	4.0878	4.56918	1.62288	0.172411	0.11204	0	15.3294	2.3737	0.491334	0
Gh_D06G0145	AT5G42890	sterol carrier protein 2	ATSCP2, SCP2	1.04577	0.511984	253.558	2.75742	1.79649	4.75877	12.1955	1.37489	0.442713	9.70812	39.4994	55.6737	164.802	722.084	587.411	33.4832	44.2192	18.5701	18.9879	938.815	422.932	155.335	85.4882
Gh_D08G0219	AT4G30010	0	0	22.881	24.3638	41.8689	34.7243	31.5372	19.6774	17.8981	36.3918	31.234	29.105	20.4923	22.3583	26.8732	78.5765	85.9073	49.4239	43.1774	23.3767	93.6202	179.466	96.4495	90.9119	88.5917
Gh_D13G1823	AT3G04780	Protein of unknown function (DUF1000)	0	32.2395	29.4086	24.474	30.1999	26.5541	19.4687	22.8595	14.9548	21.9927	27.7843	27.2584	23.8753	17.7156	78.3658	91.8793	20.3179	34.8395	17.7781	76.4268	101.709	94.3042	64.0182	62.0734
Gh_A01G1848	AT3G09740	syntaxin of plants 71	SYP71, ATSYP71	17.9827	16.0128	8.94725	3.84577	8.60829	4.14809	6.46447	4.48738	5.86662	10.5081	15.5641	14.0663	11.4847	37.5397	37.0512	14.3754	17.6537	10.5016	5.32627	40.9604	29.3693	24.1264	22.7928
Gh_A02G1450	AT3G49870	ADP-ribosylation factor-like A1C	ATARLA1C, ARLA1C	4.94925	4.67071	1.57213	0.862769	1.79633	0.258266	1.6255	0.0291067	0.411386	5.6947	8.25834	8.94707	7.43452	88.3971	78.882	17.2803	15.2354	8.87345	5.6356	132.879	76.7304	20.6896	2.48499
Gh_A02G1596	AT1G19580	gamma carbonic anhydrase 1	GAMMA CA1	18.9537	16.0516	14.5517	14.6619	22.3663	17.489	13.4126	17.8078	14.9018	9.26232	14.9866	12.5283	8.9697	54.0862	46.4166	36.5946	33.1959	18.9808	7.69242	58.5157	47.0224	58.3961	13.3276
Gh_A03G1787	AT2G21210	SAUR-like auxin-responsive protein family	0	0.48714	0.011805	0.0640847	0	0.367713	0	0	0.0566813	0	0.59895	0.243718	0.1053	0.292962	2.13241	1.37761	0.522323	0.142989	0	1.66681	4.18959	1.27376	0.0670633	0
Gh_A03G1788	AT2G21210	SAUR-like auxin-responsive protein family	0	0.580251	0.0740417	1.09878	0.84993	0	0.064906	1.48784	0.913707	0.511666	0	0	0.0600853	0	1.97258	7.76396	2.40613	5.28507	0.25957	0	29.3203	9.49055	0.151101	0
Gh_A05G2488	AT1G76520	Auxin efflux carrier family protein	0	1.61737	2.6364	0.17746	0	0.169685	0.008247	0.310873	0	0	0.047763	0.035882	0.024623	0.0647877	1.31659	2.08851	0.817883	0.5424	0.312825	0	6.46143	3.91578	0.247717	0.355297
Gh_A09G1609	AT5G07250	RHOMBOID-like protein 3	ATRBL3, RBL3	9.62274	13.6054	5.16225	18.5552	12.6143	11.0729	19.1611	18.9137	12.8894	8.62453	9.01826	8.71176	9.18909	15.2828	21.2209	20.3774	16.9154	6.94931	1.28753	54.9697	35.0826	24.5724	10.8279
Gh_D01G0671	AT3G20300	Protein of unknown function (DUF3537)	0	1.1283	0.276853	0.0332393	0.0193827	0.0358647	0.114787	0	0.0251623	1.98851	0	1.06687	0.381343	0.408258	7.73936	7.83582	2.12223	0.63305	0.588465	0	17.8347	6.11518	1.04343	2.04267
Gh_D02G0204	AT2G31680	RAB GTPase homolog A5D	AtRABA5d, RABA5d	0.310066	0.184043	10.0099	0.0464457	0	0	0	0	0	0.09089	3.28218	0.540736	4.43458	30.9369	35.4479	4.69891	4.08298	8.60385	11.1653	44.6656	10.2062	0.774086	0
Gh_D02G0207	AT5G48570	FKBP-type peptidyl-prolyl cis-trans isomerase family protein	ROF2, ATFKBP65, FKBP65	0.016044	0.110531	0	0.00598767	0.09673	0	0	0.0179307	0.064324	0	0	0	0	1.87314	1.30238	0.16157	0.818236	0.0481803	0.26143	7.54513	3.54321	0.492651	0.223106
Gh_D02G0211	AT4G02180	DC1 domain-containing protein	0	0.304549	0.22235	1.07851	0.714117	0.505896	1.06357	3.16195	0.0453993	0.0738607	2.61494	1.60148	1.93448	1.28237	5.06489	5.48817	0.625055	0.639654	1.06144	1.06324	5.72217	1.39638	0.123872	0.014712
Gh_D02G0365	AT2G18570	UDP-Glycosyltransferase superfamily protein	0	1.17494	0.247569	5.98373	12.296	2.38087	7.93453	9.69761	3.73477	4.84366	0.083361	1.14345	1.19732	1.08379	11.5979	18.3636	4.72604	1.72986	10.8499	0	29.5161	10.2962	3.51994	0.039993
Gh_D02G0395	AT4G14710	RmlC-like cupins superfamily protein	ATARD2	79.1671	83.3888	52.3757	116.045	122.897	130.548	72.0955	132.586	110.937	97.5778	44.0382	42.9306	39.3469	105.896	88.0065	94.5509	81.3267	30.9034	63.9322	265.839	147.975	186.129	165.872
Gh_D03G0408	AT2G22240	myo-inositol-1-phosphate synthase 2	ATMIPS2, MIPS2, ATIPS2	73.6846	70.8958	159.48	13.9585	30.6691	7.60662	21.0225	9.4406	8.82849	15.0467	39.1834	27.6017	23.0098	386.477	377.732	88.0335	69.3426	56.0228	25.3246	435.403	199.386	43.4138	75.7567
Gh_D06G0694	AT4G29160	SNF7 family protein	SNF7.1	35.977	37.23	16.06	112.644	42.159	34.164	41.9273	59.2594	64.8612	51.2443	29.6763	42.508	45.8868	50.5617	42.4634	67.4348	78.7397	22.2022	21.8182	152.235	138.666	83.8238	64.1553
Gh_D12G1573	AT3G25590	0	0	1.13498	6.8996	0.250337	3.74425	1.68851	3.47526	0.299792	5.05255	10.2442	0	0	0.160526	1.17305	4.41282	9.21839	1.98253	0.776488	0.904166	0	14.7341	5.57044	2.78325	0.00523
Gh_D13G0342	AT3G18820	RAB GTPase homolog G3F	ATRABG3F, ATRAB7B, RAB71, RABG3F, RAB7B	3.72723	6.90937	3.42591	5.11075	15.1952	8.45895	9.6872	1.9913	5.13586	8.96997	9.26447	6.95735	9.23251	13.0593	14.1873	10.4193	7.90391	3.55763	4.26837	21.6032	14.8222	12.788	6.85143
Gh_D13G0445	AT2G23090	Uncharacterised protein family SERF	0	56.5109	27.9497	14.7779	11.2688	52.794	19.2356	26.8776	7.41977	16.7088	32.3088	53.6015	89.7956	98.3054	160.923	112.266	313.36	146.308	40.0512	174.063	878.55	300.079	214.026	87.2909
Gh_D13G0450	AT2G14820	Phototropic-responsive NPH3 family protein	NPY2	7.93855	9.77654	1.89733	4.05035	4.32103	4.71556	1.59621	9.49908	6.71943	8.77316	1.21531	5.45361	2.83736	19.0505	14.6803	12.5013	6.79117	6.08013	1.50377	20.7178	5.94651	6.56655	17.6397
Gh_A01G1855	AT5G03120	0	0	0.691782	4.08366	9.37141	2.63002	0	2.18733	6.40206	0.0603283	0	2.54291	0	0	0	9.67069	19.4947	5.06288	3.08881	1.17593	0	105.291	13.0023	7.4554	0
Gh_A03G1839	AT1G29500	SAUR-like auxin-responsive protein family	0	0.0214117	0.79394	2.60804	0.662789	0.74757	0.371688	0	0.576177	0.31762	0.067449	0	0.137256	0.0491353	1.86204	1.81688	0.266739	0.0850397	0	0	3.16807	0.847493	0.0215077	0
Gh_A08G0204	AT1G59700	glutathione S-transferase TAU 16	ATGSTU16, GSTU16	0	0.227816	0.411655	0	0.0849083	0.0282787	2.81304	0	0	0	0	0	0	0	0	0	0	0	0	3.18519	0.543683	0.174699	0
Gh_D13G0247	AT5G03120	0	0	0	1.54347	7.73419	2.90896	3.5833	0.364206	5.50608	0.262344	0.332451	8.95021	0.061415	0	0	0.187869	1.37111	5.43542	1.7851	0.391132	0	95.4004	25.9736	5.50522	1.06229
Gh_A06G0696	AT2G05840	20S proteasome subunit PAA2	PAA2	57.7425	56.578	53.8705	59.937	59.9255	63.7478	38.7767	71.3502	61.2894	44.3326	54.0262	39.2086	31.2705	73.0468	99.9862	57.9026	65.4301	37.6532	35.3253	85.0336	102.403	97.7657	71.4256
Gh_A12G0043	AT4G02980	endoplasmic reticulum auxin binding protein 1	ABP1, ABP	6.66274	6.16119	1.32172	4.56912	6.50371	6.38706	2.82789	6.24037	5.18553	3.07716	4.23674	7.58634	8.25459	18.2035	16.0248	5.59375	10.7737	2.1632	6.46092	19.0082	26.435	15.9288	16.7511
Gh_D04G1533	AT5G10530	Concanavalin A-like lectin protein kinase family protein	0	0.009798	0.00553767	0	0	0	0.009949	0	0.007861	0.00922733	0	0	0.0220353	0.00988367	2.01262	2.29622	0.258325	0.645883	0.0413307	0	2.6304	4.51035	3.62903	0
Gh_D06G0228	AT1G10030	homolog of yeast ergosterol28	ERG28	13.1804	11.5032	15.8296	0.724639	6.81727	1.70242	1.51295	0.94278	1.24493	4.3365	14.0152	13.8562	7.43045	17.2271	40.5882	9.90516	15.0511	3.9211	12.5218	32.0193	65.4705	5.77282	2.69995
Gh_A02G0132	AT1G05810	RAB GTPase homolog A5E	ARA, ARA-1, ATRAB11D, ATRABA5E, RABA5E	10.0514	15.5681	8.97726	9.81164	8.1812	4.7092	10.918	8.54715	11.3589	10.9537	7.17881	9.31888	9.68611	11.892	15.7363	12.4254	13.8846	3.72302	12.0127	20.351	25.3942	24.2083	21.8684
Gh_A02G0136	AT4G02180	DC1 domain-containing protein	0	0.290086	0	0	0	0	0	0	0	0	0	0	0.175012	0.123467	0.673098	2.67931	0.316061	0.756205	0	0	0.422507	7.61802	1.32205	0.063698
Gh_A02G1576	AT4G36640	Sec14p-like phosphatidylinositol transfer family protein	0	17.7489	13.7791	5.13532	15.055	11.3634	14.2047	17.2088	14.7588	17.2964	7.15874	6.4227	6.1228	6.15895	37.3145	33.6174	22.2256	36.1121	11.0463	22.8695	27.8776	48.6199	13.5997	11.5761
Gh_A05G0088	AT4G13730	Ypt/Rab-GAP domain of gyp1p superfamily protein	0	2.7152	2.29508	2.1068	5.37199	4.30365	4.16722	3.42173	3.41951	1.88965	4.27871	4.81503	6.52344	7.80037	17.4219	14.5708	7.73691	10.4832	1.8947	3.46547	16.0789	21.1304	13.392	17.204
Gh_A06G0693	AT5G20650	copper transporter 5	COPT5	34.5687	34.43	14.961	115.097	42.3226	43.1051	43.5858	59.3953	70.9059	30.0381	47.6677	28.1724	51.6768	104.723	69.4958	72.8876	67.1497	8.92169	9.44298	152.568	276.997	196.052	96.0392
Gh_A09G1612	0	0	#N/A	1.37776	4.71427	1.39534	1.05614	0.919115	0.67709	2.07641	0	0.190961	2.6046	0	0	0.398139	1.3569	1.65317	2.30199	0.504159	0.270539	0	6.59783	8.73778	1.22252	0
Gh_A12G1881	AT5G46850	0	0	7.34037	4.04364	2.05587	5.81625	4.50102	2.63853	2.21868	5.50854	5.5971	4.71498	4.57394	3.19754	2.52472	5.11889	6.43542	3.12814	5.28746	1.83754	4.89559	4.44498	7.90354	7.81498	5.9838
Gh_D03G1420	AT5G52650	RNA binding Plectin/S10 domain-containing protein	0	156.509	130.877	125.972	50.235	128.424	102.948	57.3038	59.7416	69.6322	62.5108	29.0861	19.0331	25.2857	376.109	397.602	132.98	159.574	55.9906	67.9441	418.965	655.144	563.424	383.893
Gh_D04G1540	AT2G32800	protein kinase family protein	AP4.3A	0.360822	1.74364	0.997023	16.5207	0.107337	3.03622	12.9526	0.671824	1.17628	3.79436	1.25067	3.28579	2.72033	20.7813	18.9545	6.0838	7.08204	1.85909	0.544593	43.7949	54.731	28.1639	4.59
Gh_D05G0781	AT5G06480	Immunoglobulin E-set superfamily protein	0	34.3767	40.0465	67.5155	57.3058	46.0096	65.3572	58.9723	32.9382	28.7126	49.0125	59.3351	47.7071	69.4074	52.1289	58.9113	49.3889	50.7957	23.0032	31.4236	64.0728	77.3128	47.6593	26.0244
Gh_D08G0232	AT3G55820	Fasciclin-like arabinogalactan family protein	0	3.94816	0.819153	0.142968	4.07614	5.86565	0.605744	1.85984	10.8059	9.75029	1.89768	2.34261	1.14667	1.14532	3.99685	4.5821	4.21629	9.62263	1.41943	9.8868	5.32179	17.1582	3.03947	4.82381
Gh_D08G0233	AT5G57330	Galactose mutarotase-like superfamily protein	0	29.3201	27.4266	12.7242	14.8975	33.6049	23.86	22.0751	30.3636	27.6982	25.4404	36.72	16.5904	17.358	30.46	40.8673	38.6349	41.7358	17.8957	16.9694	52.0495	56.2185	42.0216	39.3878
Gh_D08G0240	AT2G18910	hydroxyproline-rich glycoprotein family protein	0	32.2241	22.0257	7.73992	16.3564	37.3904	76.2677	27.6964	22.9799	33.2162	41.9042	21.8346	15.5098	32.6057	68.6104	60.1746	61.2901	65.7512	18.1483	41.4196	43.4711	125.145	65.0309	68.8339
Gh_D13G1839	AT1G64760	O-Glycosyl hydrolases family 17 protein	0	7.24012	11.4964	1.52209	21.1642	14.6542	5.39356	36.9008	43.3531	14.5608	43.2048	4.50512	3.73152	2.29638	7.67285	18.3201	14.7309	15.0945	2.88291	1.80514	16.6938	50.4777	47.9359	18.2796
Gh_D13G2279	AT5G12190	RNA-binding (RRM/RBD/RNP motifs) family protein	0	81.9236	75.9532	69.7479	45.9457	125.605	90.4305	83.3023	81.5185	52.8391	79.4847	111.6	132.888	113.65	129.139	128.089	84.5908	114.004	33.023	117.338	234.906	251.767	138.747	126.772
Gh_A02G1452	AT3G49880	glycosyl hydrolase family protein 43	0	11.7499	10.0309	1.05483	1.24029	3.76622	6.72879	3.75259	0.869988	2.47934	3.64997	2.36083	1.24141	2.55313	2.96689	5.44202	4.21702	5.40279	4.86532	2.58372	5.86294	26.7432	20.0049	12.9688
Gh_D03G1419	AT1G63910	myb domain protein 103	AtMYB103, MYB103	3.80814	15.6113	0.0974283	0.448367	1.05262	0.0137957	0	0.082842	0.837465	0.061431	0.0343135	0	0	0	0.045443	6.08301	35.8988	0.570784	2.00149	4.01904	55.225	36.2933	28.9999
Gh_D08G2066	AT2G20190	CLIP-associated protein	ATCLASP, CLASP	14.1888	16.0099	2.27158	2.64589	6.94497	8.07238	6.28138	2.48762	2.72283	10.8066	19.6953	21.8694	15.2434	6.67003	12.4443	19.899	19.7965	21.4354	3.32551	9.49559	22.4295	21.0217	19.4317
Gh_A02G0125	AT2G41100	Calcium-binding EF hand family protein	TCH3, ATCAL4	1.43592	1.26667	0	0.665613	0.0437207	0	0.00690433	15.735	0.616512	0	0.040595	0	0	0	0.0372403	0.202008	2.71066	0	0.483499	0.686168	39.321	31.0909	11.3342
Gh_A03G1810	AT5G66140	proteasome alpha subunit D2	PAD2	21.4849	14.7284	6.06896	6.07923	23.7006	17.5998	6.40382	8.84123	8.87428	12.232	3.59367	3.98543	3.28389	12.2471	13.9819	6.45528	12.4482	1.10107	7.66686	15.2094	34.5162	19.813	34.3489
Gh_A05G0053	0	0	#N/A	0.188422	10.6675	26.148	11.2859	1.06818	18.8296	8.80375	1.06069	0.0663967	41.3064	0	0	0	4.74204	2.84852	10.9533	17.9422	0.438529	0	27.7745	135.135	14.8547	2.07221
Gh_A08G0203	AT1G11910	aspartic proteinase A1	APA1, ATAPA1	175.718	200.257	93.128	231.377	169.865	263.72	145.581	132.902	125.233	218.914	95.6708	47.9967	34.2021	80.8504	84.5826	241.837	257.102	43.3627	85.1195	223.58	299.194	241.169	185.04
Gh_A11G0814	AT4G13650	Pentatricopeptide repeat (PPR) superfamily protein	0	7.59727	8.06251	11.0024	32.0511	2.39825	11.7376	15.3539	13.1625	9.3604	5.29467	5.52044	7.17786	4.05908	7.29679	9.24666	7.88109	8.09504	5.07798	1.53757	26.547	41.4269	32.383	10.1897
Gh_A12G0233	AT3G50440	methyl esterase 10	ATMES10, MES10	27.5883	6.31685	0.233113	40.2946	0.130335	5.41996	0.171149	13.0888	26.7586	1.95526	0.0785345	0.613766	0.261822	0.0902795	1.78004	18.013	25.5105	0.158677	0.789872	9.98603	42.8017	2.44075	0.254435
Gh_A12G1522	AT1G69690	TCP family transcription factor	0	7.8131	17.3036	6.97632	12.743	1.5776	10.3971	35.2617	0.99938	0.337675	32.9233	0.343605	0.79591	1.78361	4.82997	6.18474	19.0281	8.29188	5.17568	0.039877	29.2358	50.2853	3.16718	0.35575
Gh_D06G0204	AT1G59520	CW7	CW7	10.9346	9.73796	5.70487	5.89915	5.70921	6.64208	6.3244	6.97109	5.3426	6.01234	9.94942	11.2489	8.48095	5.11114	7.02985	10.6364	13.7909	7.92424	8.46189	6.26105	15.807	8.31317	7.67932
Gh_D10G2029	AT3G10660	calmodulin-domain protein kinase cdpk isoform 2	CPK2, ATCPK2	30.5133	24.5136	11.1496	31.0832	20.6491	26.0087	22.59	21.8801	12.0417	20.7914	26.1898	36.4763	32.0086	13.2578	25.9235	33.0653	32.1783	15.5183	7.67704	27.0577	52.9157	17.9413	6.82614
Gh_D10G2031	AT3G52060	Core-2/I-branching beta-1,6-N-acetylglucosaminyltransferase family protein	0	13.3212	11.835	1.53571	7.64171	9.25654	11.5295	12.3709	1.68646	6.28276	20.868	3.33114	3.42738	3.9003	9.22893	10.5857	8.83252	12.0463	2.2316	4.18129	11.0693	27.1104	8.74822	22.7904
Gh_D12G1561	AT1G01380	Homeodomain-like superfamily protein	ETC1	5.57678	7.44879	28.0804	3.35204	1.88819	3.33454	7.10004	0.941923	0.637266	5.43784	51.4479	48.1559	31.5666	12.02	14.534	10.7938	10.8333	1.00833	18.9394	58.0549	58.3037	25.5394	7.97376
Gh_D12G1644	AT1G69690	TCP family transcription factor	0	5.79369	13.2919	13.9197	3.6319	2.71302	7.32746	46.0433	0.638808	0.740628	30.8168	1.31307	0.986441	2.20135	5.33343	10.7297	33.6212	21.6116	8.69358	0.834413	43.6857	75.4332	7.10499	0.967494
Gh_D13G2278	AT5G12180	calcium-dependent protein kinase 17	CPK17	0.0761097	0	0.0458807	0.0432737	0.0124207	0	0	0.807067	0.022696	0	0.737781	0.222017	0.409473	5.09651	5.23022	1.75954	2.64297	0.640738	0	5.62811	6.97403	3.91847	3.55706
Gh_A08G2045	AT1G71350	eukaryotic translation initiation factor SUI1 family protein	0	10.6775	11.5221	3.65106	6.13359	9.39383	10.3381	5.10956	9.08187	6.7001	10.4256	15.5891	7.1357	6.43515	14.3537	14.8102	15.6172	11.3134	10.8523	4.3672	14.299	12.9346	18.6741	17.6594
Gh_A09G1659	AT5G53480	ARM repeat superfamily protein	0	13.59	11.61	1.83135	8.4341	9.45917	9.35325	6.53616	8.2562	5.81714	7.75886	7.6418	5.57971	5.02395	18.0305	25.0896	18.6089	13.3358	9.38826	2.89388	25.1844	25.6919	36.8411	20.3264
Gh_D08G0218	AT4G19870	Galactose oxidase/kelch repeat superfamily protein	0	12.7078	11.573	5.22413	9.9136	13.881	11.3619	12.2196	8.95924	7.00789	5.23912	13.6107	11.6384	10.4715	27.3177	25.2064	22.1857	19.745	17.9392	6.45845	28.0149	26.6278	44.8432	12.5337
Gh_D09G1406	AT2G37195	0	0	2.25382	3.20027	2.62589	4.29463	4.21402	3.97743	0.523983	1.10018	4.09661	0.711062	20.1561	26.7667	21.3056	13.128	12.2522	27.0698	15.3953	5.95871	15.5158	29.8776	22.8501	39.059	3.3689
Gh_A02G1562	AT4G36750	Quinone reductase family protein	0	9.38656	11.8579	2.35103	4.83714	4.22034	5.83074	4.22983	4.29666	7.71707	7.19494	3.71922	2.8614	4.46444	10.1102	11.6483	11.539	8.22356	3.68804	5.65377	11.4572	10.4021	22.1863	5.9855
Gh_A02G1616	AT4G36250	aldehyde dehydrogenase 3F1	ALDH3F1	0	0.171004	5.08717	2.02136	6.00187	7.14078	8.27127	0.108946	0.212531	5.32705	15.0589	15.3897	14.0668	47.5206	43.1946	23.2859	23.6667	3.72796	2.40743	95.8136	120.683	205.069	113.459
Gh_A03G1117	AT1G67600	Acid phosphatase/vanadium-dependent haloperoxidase-related protein	0	4.99178	5.42047	1.82871	11.3853	0.522968	5.90472	9.33593	3.68518	5.27016	2.73873	0.728072	1.22791	1.91312	10.1268	6.41222	4.5803	9.51657	0.737718	0.963313	10.1214	11.2717	13.1258	12.132
Gh_A07G2079	AT5G40760	glucose-6-phosphate dehydrogenase 6	G6PD6	41.2961	32.4975	10.7573	50.0643	35.2479	70.4324	27.0905	39.1175	49.7547	29.5509	37.7948	22.7086	35.0121	41.4112	45.0322	45.3877	57.1141	12.9635	13.5382	47.0402	63.5122	116.495	56.0526
Gh_A10G1250	AT1G06130	glyoxalase 2-4	GLX2-4	30.2294	32.661	10.6329	14.133	17.8848	23.7906	32.0332	17.8219	13.7235	39.1191	43.6976	33.2193	36.2971	30.3787	26.0284	26.7688	39.5187	16.0305	31.3547	51.1741	76.0441	93.5182	51.291
Gh_A12G0042	AT1G03350	BSD domain-containing protein	0	38.1631	42.431	5.4661	38.8715	46.1714	35.3337	20.3733	31.8885	28.8571	39.3874	17.0348	22.4717	17.7971	39.1199	39.3995	44.5309	47.1558	29.604	16.7259	37.6233	55.1457	94.9048	84.7842
Gh_A12G0195	AT2G15280	Reticulon family protein	0	7.23474	5.77341	2.4714	4.03771	4.84937	6.03559	7.15011	8.34545	5.48813	7.67757	5.20174	4.46973	3.24378	6.29548	9.56631	7.00412	5.27944	6.96726	3.71136	9.42102	12.4454	23.2907	17.207
Gh_D02G2042	AT2G18990	thioredoxin domain-containing protein 9 homolog	TXND9	33.8498	39.583	24.7615	11.2404	40.9638	27.2729	47.7108	8.0674	12.8399	38.1512	43.9967	26.1632	20.855	42.0375	44.792	46.5997	53.1447	28.7409	40.9606	47.3722	49.4033	62.2246	37.1633
Gh_D03G0211	AT5G67020	0	0	4.23663	3.06	1.47778	1.59386	2.88252	1.6836	11.6002	0.440124	0.663984	13.5733	0.705785	1.28776	0.908667	2.38841	1.71002	2.94763	15.372	1.71492	1.33961	10.0194	15.3436	16.0615	1.74653
Gh_D04G1235	AT3G54120	Reticulon family protein	0	7.65148	9.70464	3.48017	5.88749	13.2866	8.10838	11.6507	4.13941	4.55895	15.3113	3.13914	2.67963	3.28167	9.17245	9.23304	17.9913	11.2838	8.03231	8.98171	25.9829	19.6032	31.3578	17.4568
Gh_D05G2119	AT5G49710	0	0	19.0694	17.8848	9.57281	33.119	11.8207	15.6516	13.301	31.0859	29.9066	11.6712	14.4938	21.5131	18.6911	16.1053	14.1882	18.0549	20.1994	10.1407	19.9573	30.9096	27.9354	36.4335	15.3089
Gh_D06G0226	AT1G10050	glycosyl hydrolase family 10 protein / carbohydrate-binding domain-containing protein	0	17.6147	9.58437	1.05633	3.36041	4.37108	5.46996	1.59503	1.8061	2.82568	3.44468	1.98622	1.08626	0.957146	7.00912	6.3176	8.98304	9.40651	2.13419	0.392979	11.4774	10.5389	22.6801	14.275
Gh_D08G0245	AT4G27000	RNA-binding (RRM/RBD/RNP motifs) family protein	ATRBP45C	40.8854	43.6991	18.3686	42.0657	47.5526	61.2366	33.3367	72.7991	42.4817	33.1542	27.5009	20.6848	13.5847	57.8232	63.9672	39.1898	42.9621	31.8891	8.52077	50.8331	71.6332	90.4555	68.587
Gh_D10G0021	AT1G78900	vacuolar ATP synthase subunit A	VHA-A	58.1432	57.4724	15.4022	45.544	66.9643	78.8428	29.2682	49.3011	49.9183	47.1285	37.3616	17.5788	13.5296	93.0435	103.122	92.5518	78.6926	54.9128	15.0247	101.798	90.3476	116.126	74.5192
Gh_D10G0025	AT1G51540	Galactose oxidase/kelch repeat superfamily protein	0	5.01292	6.24643	4.23702	3.79658	4.03588	2.69128	5.6475	1.90479	3.51372	9.42385	3.06362	1.57884	1.24806	3.71316	5.74605	7.64328	4.83794	4.82073	4.54472	4.31839	7.32513	10.0975	6.91297
Gh_D10G0031	AT1G51590	alpha-mannosidase 1	MNS1, MANIB	6.43956	5.62469	1.57106	3.7317	3.36674	3.81273	3.8164	3.18404	5.75886	4.86614	5.24223	2.30965	1.77879	6.58602	10.5932	4.7478	6.64062	5.31741	2.13926	7.47494	10.4822	12.2966	10.3274
Gh_D10G0035	AT1G59610	dynamin-like 3	ADL3, CF1, DRP2B, DL3	10.369	8.85423	1.53725	8.3991	5.10859	5.07242	2.91759	6.31756	7.37188	4.36765	14.3909	10.4903	6.85809	15.6464	15.0915	15.8376	12.0855	9.48435	2.35863	12.8014	12.9496	22.5434	11.0273
Gh_D10G2092	AT5G04270	DHHC-type zinc finger family protein	0	7.77095	7.57713	2.68744	8.82876	10.4453	11.8086	8.87655	11.1768	8.39311	10.8327	8.55717	4.47302	5.76049	6.15563	9.3135	7.90775	11.6628	5.54463	4.57575	11.7925	13.9391	23.7135	19.8708
Gh_D13G0306	AT4G39080	vacuolar proton ATPase A3	VHA-A3	35.582	45.6616	11.7765	50.2407	39.7126	48.1544	24.6783	60.6089	46.9663	27.954	22.7884	19.9243	18.6827	35.0759	47.9886	32.6803	39.3624	25.0716	9.47998	38.8032	55.0836	69.2715	50.6107
Gh_D13G0338	AT4G34490	cyclase associated protein 1	ATCAP1, CAP 1, CAP1	30.2894	32.7371	13.3274	14.0524	20.9433	14.5934	17.1702	9.44867	16.0087	33.7432	25.1646	12.2095	10.3145	37.6268	48.4047	36.6553	33.2054	20.3514	13.0983	47.6697	59.3538	92.3552	88.6023
Gh_D13G0555	AT4G38270	galacturonosyltransferase 3	GAUT3	4.533	3.71213	0.80321	3.15188	2.88916	2.99694	4.36565	5.96665	4.34442	3.35112	6.97307	7.21052	4.49461	4.2389	5.05898	4.24835	4.54327	2.71263	2.34922	4.21209	5.79527	8.06781	5.69886
Gh_A01G1871	AT3G53520	UDP-glucuronic acid decarboxylase 1	UXS1, ATUXS1	19.6718	26.5649	5.39859	23.2052	28.4752	28.6989	19.8055	35.3725	27.2224	19.5004	8.32968	8.17848	8.61394	20.9411	27.7319	30.9499	34.8172	13.8172	11.8235	22.539	47.8019	69.5239	56.3347
Gh_A01G1873	AT3G53540	0	0	8.19507	8.2369	1.12028	2.19322	2.98563	4.12944	0.50673	3.34406	3.45443	0.310345	6.9656	3.52879	2.46869	3.60027	2.71765	5.39691	10.9942	4.25677	2.08208	3.81302	5.55724	12.9493	4.67455
Gh_A07G2050	AT5G40470	RNI-like superfamily protein	0	4.2439	3.56309	0.539645	7.2107	2.67695	5.65553	3.10927	9.37552	6.07404	2.88838	4.22062	4.01181	5.4364	3.95333	2.7409	2.91819	5.10072	1.37179	1.47026	3.8392	6.68903	10.5957	10.3124
Gh_A07G2066	AT4G35860	GTP-binding 2	ATRABB1B, ATGB2, ATRAB2C, GB2	0.834454	1.08593	0.297264	0.609678	0.45515	0.297825	0.162249	0.329382	0.434005	0.783461	1.2759	1.62526	1.72119	2.61407	2.20065	1.63885	3.10909	0.795208	1.66609	2.9984	4.31797	5.67299	4.26192
Gh_A09G1602	AT5G51830	pfkB-like carbohydrate kinase family protein	0	2.44878	0.65937	0.10126	7.04017	1.30486	3.12519	0.469892	20.5852	14.9294	1.1077	1.23513	0.349002	0.241597	0.258582	0.368225	6.91871	8.88152	0.91828	1.27952	0.593554	0.63606	38.9729	21.4176
Gh_A10G1253	AT1G67930	Golgi transport complex protein-related	0	16.7742	14.6205	1.76342	7.94124	14.5643	11.3637	7.91201	9.20618	12.3582	13.2638	9.4547	4.78392	3.8239	7.73977	14.4232	19.6704	15.8215	11.5777	3.97458	6.99857	15.1273	19.7937	18.8744
Gh_D01G0677	AT4G22340	cytidinediphosphate diacylglycerol synthase 2	CDS2	0.560275	0.723236	0.0132213	0.651397	0.212579	0.0746883	0.228454	0.554602	1.76594	0.205532	0.742157	0.326038	0.077978	0.287673	1.32121	1.08245	0.814465	0.177091	0.524248	1.87922	3.30736	7.2008	3.16938
Gh_D02G0380	AT3G22620	Bifunctional inhibitor/lipid-transfer protein/seed storage 2S albumin superfamily protein	0	1.29296	0.283994	0.232329	0.545948	0.132182	1.21882	0	0.643476	1.05448	0.361981	1.32781	0	0	0	0.901354	617.061	112.837	9.53194	4.37618	0.771194	370.393	6608.15	925.147
Gh_D02G0382	AT3G22600	Bifunctional inhibitor/lipid-transfer protein/seed storage 2S albumin superfamily protein	0	3.23556	9.05669	0.717787	17.5979	1.36448	5.5804	1.42239	3.78321	10.0667	1.2597	3.26505	4.20938	2.81244	0.898135	1.83335	178.861	270.547	7.15774	3.27392	52.7835	819.239	1907.06	321.066
Gh_D02G2039	AT3G19540	Protein of unknown function (DUF620)	0	2.66819	4.21157	0.0943393	6.16778	1.24224	3.45015	0.849013	1.69067	3.61073	0.36723	0.107263	0.141717	0.251573	0.22757	0.483529	5.82629	5.73519	1.24978	1.0955	0.296831	1.50879	57.8604	22.647
Gh_D05G2141	AT1G72220	RING/U-box superfamily protein	0	8.09213	14.1634	0.0601253	2.19556	2.07181	3.25219	0.170522	3.22515	16.3778	1.00405	0.0731675	0	0	0.0478045	0.048894	16.1319	34.3744	2.04689	5.54372	1.4924	31.2339	164.377	90.5547
Gh_D06G0604	AT3G24550	proline extensin-like receptor kinase 1	ATPERK1, PERK1	12.1059	10.398	1.07402	1.43331	3.2036	2.21277	1.16928	2.50876	3.29681	4.24436	8.57673	5.21115	2.21788	6.06662	11.7249	9.87187	5.94226	5.66318	2.7654	7.93994	25.9858	95.1295	78.7354
Gh_D06G0650	AT5G19680	Leucine-rich repeat (LRR) family protein	0	1.96592	2.43961	0.35859	2.03251	1.78647	1.12515	0.56131	1.32235	2.08478	1.4253	0.997031	0.376474	0.153263	1.09402	1.39361	1.6711	1.8301	1.83753	0.35711	2.51314	5.82275	9.25418	4.71843
Gh_D06G0652	AT2G19950	golgin candidate 1	GC1	0.736821	2.08016	0.328648	0.658675	1.39887	0.554486	0.748473	0.132473	0.557702	1.52429	5.9812	3.29687	1.78545	2.54402	3.73702	3.15215	7.46118	2.6386	0.861218	2.19417	3.90655	8.416	6.22673
Gh_D08G0606	AT3G60220	TOXICOS EN LEVADURA 4	ATL4, TL4	0.641498	1.30453	3.05843	2.1384	0.669334	4.99981	4.59133	0.686897	1.21172	0.886361	2.33223	6.30631	2.74946	4.53496	5.32542	13.77	18.8033	5.27267	5.72847	2.30497	22.4973	32.401	28.5462
Gh_D13G0440	0	0	#N/A	275.956	600.892	13.3355	3.46245	24.2946	11.7112	7.30204	3.15036	3.20503	11.5678	8.59986	1.89158	6.10625	63.044	58.1473	4188.69	1388.97	47.6585	13.4052	936.768	5272.36	10149.7	8701.21
Gh_D13G0564	AT4G35300	tonoplast monosaccharide transporter2	TMT2	21.1566	29.7479	2.45516	6.42758	11.2813	7.16851	3.81203	5.38481	11.6631	7.77903	4.93942	1.4844	1.63272	13.8028	32.5798	43.5838	25.0477	27.7507	6.32264	25.6168	45.0952	315.15	116.574
Gh_D13G2301	AT3G45590	splicing endonuclease 1	ATSEN1, SEN1	1.06441	1.86226	0.580306	0.858155	0.892838	2.46612	1.86072	0.492015	0.611361	0.367278	3.97055	3.38188	2.57998	3.26241	2.92047	1.62296	5.36036	1.30415	0.176606	3.55701	10.1457	28.2782	4.86831
Gh_D13G2302	AT5G60400	0	0	0.0314037	1.63726	1.73466	0.216297	0.702705	2.73493	0.466222	0.0820737	0.124094	0.11979	1.84843	10.9689	4.08979	4.95558	1.90796	2.74073	7.85781	3.38707	17.776	16.2015	9.4637	29.6892	4.84349
Gh_A01G1854	AT2G37110	PLAC8 family protein	0	65.004	128.928	59.3587	108.007	51.0692	69.2179	86.2091	116.041	78.8229	87.1979	33.796	19.6134	18.742	60.8839	84.668	70.2139	79.799	24.597	36.7986	116.508	134.626	176.089	139.238
Gh_A02G0135	AT3G59290	ENTH/VHS family protein	0	50.0427	52.314	4.77695	41.3546	27.1786	42.6145	29.42	34.1739	29.15	28.1867	24.2057	20.2669	24.217	40.2245	48.2398	71.8523	70.9015	36.6439	3.91742	35.0263	56.5085	78.017	37.3187
Gh_A02G1444	AT5G65910	BSD domain-containing protein	0	35.7125	33.3271	10.1144	22.3157	31.4167	30.9495	27.7233	30.5761	23.7596	27.7211	28.2716	37.6211	25.5139	27.2088	29.27	31.0914	37.5885	13.6158	15.8003	17.5898	35.095	38.9765	36.1481
Gh_A02G1577	AT3G50845	Protein of unknown function (DUF59)	0	14.3846	10.4927	3.72981	8.71883	8.95765	9.56782	7.51236	4.44808	7.06829	7.29534	12.4334	11.049	10.341	15.1204	12.0582	20.3403	14.9573	13.2994	17.2453	12.9699	15.8054	22.2607	11.5614
Gh_A03G0132	AT1G63640	P-loop nucleoside triphosphate hydrolases superfamily protein with CH (Calponin Homology) domain	0	6.2415	6.95027	2.49227	2.88694	5.63992	3.80796	3.66305	7.88168	3.46279	3.38374	11.8213	9.65602	3.71576	7.30351	9.22518	11.9966	9.51174	11.1057	2.39676	7.09694	11.2211	12.9723	7.39235
Gh_A03G1797	AT4G38710	glycine-rich protein	0	15.6136	12.5315	3.95844	9.13278	9.20899	10.9887	8.54276	12.2787	10.4167	5.33944	14.618	10.6433	9.39859	17.3915	16.4832	17.9779	19.6273	11.0956	5.36201	15.8387	22.3398	23.8835	15.7419
Gh_A05G0043	AT4G32610	copper ion binding	0	29.6543	24.7112	11.7531	25.7328	44.1037	30.6164	20.8168	30.7	25.6044	22.0347	21.4669	40.6943	42.019	34.2704	23.5626	36.6149	17.748	21.3189	9.89739	26.047	22.0837	50.8322	18.3157
Gh_A05G0066	AT1G15690	Inorganic H pyrophosphatase family protein	AVP1, ATAVP3, AVP-3, AtVHP1;1	18.4355	36.3634	16.1503	13.6853	146.251	172.985	30.4467	13.933	12.0622	29.8217	36.9055	38.6956	43.4778	81.5749	131.037	65.9417	55.9815	45.0774	4.1688	51.4527	27.8716	177.172	31.9841
Gh_A05G2538	AT3G57120	Protein kinase superfamily protein	0	2.24362	3.61926	0.941161	3.4949	3.1872	3.55713	2.41764	4.11681	5.45761	2.34887	0.955206	1.38906	2.03888	4.38794	4.6269	2.54425	2.4549	0.479344	2.87407	1.75216	6.73305	9.77294	5.76892
Gh_A08G0266	AT4G00110	UDP-D-glucuronate 4-epimerase 3	GAE3	1.36638	1.08578	0.343768	0.218631	0.992876	0.57188	0.922744	1.00335	0.396427	0.491494	0.198609	0.282188	0.168651	0.530879	0.870134	1.32759	0.847534	1.01502	0.993278	0.774488	1.42661	3.10086	1.31311
Gh_A08G2021	AT3G17611	RHOMBOID-like protein 14	ATRBL14, RBL14	3.42715	3.95062	1.00608	7.16503	4.93039	6.43125	3.38356	11.7155	7.55216	3.69423	7.04901	7.46551	9.86415	9.33268	8.67662	9.97993	10.5374	4.17678	3.49858	11.9367	15.0301	27.4934	25.0717
Gh_A08G2044	AT1G59610	dynamin-like 3	ADL3, CF1, DRP2B, DL3	33.3306	28.9413	6.11426	21.5659	29.4141	29.1456	24.3815	31.1389	20.704	32.4948	43.8021	34.784	27.4599	30.4683	37.2997	47.2122	33.8441	36.4057	11.589	25.9281	29.7611	50.0074	40.2761
Gh_A09G0206	AT5G15070	Phosphoglycerate mutase-like family protein	0	14.2429	8.99763	4.27872	7.84934	4.84829	5.04425	3.49335	27.4421	5.44738	5.394	15.3932	8.85412	9.24285	13.9709	15.5334	19.0687	21.9565	5.74576	0.106866	17.1561	37.6408	66.4918	8.63271
Gh_A09G0208	AT3G47950	H(+)-ATPase 4	AHA4, HA4	78.2768	38.9629	11.7097	87.4973	34.622	83.8574	16.417	129.995	96.9636	23.0093	16.2728	6.34304	6.52205	17.8107	16.2122	35.414	60.2545	23.7732	21.7082	31.7096	63.5378	165.778	150.944
Gh_A09G1660	AT5G53480	ARM repeat superfamily protein	0	2.90553	2.91611	0.794136	1.31168	2.11026	1.96737	1.65062	1.38672	1.49378	2.95121	3.13002	1.20888	1.82783	2.52498	4.58388	4.66911	2.31469	3.38204	1.28328	3.1624	3.59322	7.27564	2.39424
Gh_A11G1543	AT5G59440	P-loop containing nucleoside triphosphate hydrolases superfamily protein	ZEU1, ATTMPK.2	37.4816	30.3859	21.8699	11.1289	16.2195	13.2273	17.5401	11.3075	9.26407	10.3138	25.09	25.3206	16.5513	22.5442	35.0911	24.5768	25.0444	19.6323	29.6062	38.0536	37.5945	46.7876	36.1619
Gh_D01G0663	AT2G41640	Glycosyltransferase family 61 protein	0	0.689498	0	0.0107063	0.144802	0	0	0	0.235895	0	0	0	0.056256	0.0397977	1.49202	1.97389	0.992658	0.486211	0.414851	0	8.79376	6.88776	13.0527	7.88647
Gh_D02G0378	AT4G10250	HSP20-like chaperones superfamily protein	ATHSP22.0	0.324644	2.27491	0.0435317	1.01191	0.0357933	0.1195	0.537815	8.9018	1.28627	8.39593	0.039626	0.0335583	0.299238	3.03399	5.96442	2.2741	0.212707	0.72257	0.719176	4.06664	5.98805	29.4314	26.6083
Gh_D03G1407	AT5G56350	Pyruvate kinase family protein	0	49.7868	30.8841	11.2316	19.2295	37.1298	24.4958	27.8239	36.6542	20.2329	18.3408	21.6591	4.90604	12.1327	37.7433	61.8521	27.2344	27.312	8.69029	7.97131	40.1071	51.8562	115.171	61.2792
Gh_D04G1523	AT5G64300	GTP cyclohydrolase II	ATGCH, GCH, ATRIBA1, RFD1	9.68814	11.2564	7.15179	11.6931	9.36834	11.7516	10.2773	12.0533	10.3815	12.6451	11.1534	6.59742	3.54844	7.84731	10.5274	14.2107	13.2216	3.03052	2.13682	6.79755	9.35446	16.3262	10.4926
Gh_D05G2137	AT5G65380	MATE efflux family protein	0	3.21873	1.70928	0.98453	2.38198	2.40545	1.06532	1.5643	0.663785	1.33349	2.85475	2.18189	1.8477	0.744615	2.53089	3.42661	2.74856	3.6034	2.48469	0.409371	2.76771	5.02892	5.46739	2.04535
Gh_D08G0215	AT4G29900	autoinhibited Ca(2+)-ATPase 10	ACA10, CIF1, ATACA10	29.215	37.1638	5.74755	80.1712	42.964	39.8873	62.9966	47.7991	50.4871	40.188	18.8572	14.2281	10.358	15.6212	23.7625	49.4331	74.1	23.8415	10.4049	30.7149	63.2281	109.677	73.5826
Gh_D08G0247	AT5G54780	Ypt/Rab-GAP domain of gyp1p superfamily protein	0	14.7684	14.1019	5.27671	8.87933	11.7213	13.8778	16.1911	3.99342	6.72683	8.78898	10.7351	11.627	10.7209	14.0791	17.7986	13.8831	13.5342	7.88654	3.26703	14.3077	15.0972	20.835	6.46356
Gh_D08G2065	AT4G28770	Tetraspanin family protein	0	36.0324	40.3587	22.6886	34.7778	19.0135	23.4753	23.7355	26.1837	18.2595	19.5052	54.7402	27.5227	39.0804	16.8049	20.3268	33.5615	40.0791	25.7261	25.1345	28.9004	61.9299	106.16	90.0698
Gh_D08G2231	AT1G55000	peptidoglycan-binding LysM domain-containing protein	0	19.0777	22.4769	10.0508	17.853	21.0927	22.7369	10.6265	28.3081	19.3474	16.7604	16.9045	11.1091	14.794	19.5408	18.2616	30.4242	25.1325	10.4135	5.51055	32.2955	27.529	34.944	28.5615
Gh_D08G2265	AT4G14880	O-acetylserine (thiol) lyase (OAS-TL) isoform A1	OASA1, OLD3, CYTACS1	93.1591	88.445	32.4298	255	124.277	178.232	42.138	269	322.057	48.217	40.7515	33.443	31.0117	88.632	84.1679	95.2598	128.701	76.6546	89.5842	102.909	137.69	395.505	389.167
Gh_D10G0015	AT1G16780	Inorganic H pyrophosphatase family protein	VHP2;2, AtVHP2;2	10.1049	7.95938	3.14054	8.44012	6.73105	6.53939	4.76532	8.54832	9.55519	7.50645	7.38053	3.97154	3.36264	8.37077	12.2179	25.3814	12.7708	26.3884	2.87515	11.2632	13.8664	32.4329	27.2303
Gh_D10G0043	AT4G19490	VPS54	ATVPS54, VPS54	9.29193	8.01319	1.35649	5.11399	6.05616	5.94179	6.03011	6.00214	4.5277	9.79577	7.1671	3.077	2.98488	3.08841	7.12894	9.37466	9.04606	6.33236	1.48533	5.12496	7.70531	12.0453	8.08997
Gh_D13G0573	AT1G76490	hydroxy methylglutaryl CoA reductase 1	HMG1, HMGR1, AtHMGR1	16.5413	16.4056	5.6839	5.61316	8.00608	11.8213	7.76717	6.1417	4.68744	2.46288	9.82791	8.2894	6.09126	15.457	16.6621	13.2981	13.0347	12.5991	1.21149	11.3443	11.0748	18.3101	0.906943
Gh_A07G1784	AT3G07470	Protein of unknown function, DUF538	0	16.2589	25.0538	11.341	15.3652	13.3207	15.2229	14.7974	10.9259	13.7101	14.3327	17.642	16.6366	14.7655	36.8633	25.8354	38.4102	26.619	13.7018	10.8679	37.1466	42.2228	81.2508	97.2952
Gh_D05G0776	AT5G06600	ubiquitin-specific protease 12	UBP12	9.4691	7.546	1.5482	4.74416	6.31245	6.87115	3.8163	5.96007	4.76746	7.29715	11.5693	6.84339	4.65808	11.7231	13.5847	11.1576	10.7671	6.17467	1.64818	10.2096	10.8619	20.2187	20.4062
Gh_D08G2376	AT3G07020	UDP-Glycosyltransferase superfamily protein	0	3.25553	1.74319	0.606573	3.31778	1.31583	0.842064	0.66514	4.57632	6.02704	1.84017	5.21096	2.40163	1.47413	6.59912	7.22901	4.96454	5.07315	4.3529	3.20487	5.73543	4.85239	14.0504	19.1484
Gh_D10G0032	AT2G18840	Integral membrane Yip1 family protein	0	0.955304	0.802035	0.305176	0.483767	0.418885	0	0.45849	0.674143	0.0994323	0.390419	0.142336	0.0868053	0.108121	7.02229	6.69997	1.74123	2.5469	10.4666	2.48814	1.49914	3.54528	10.4814	11.3498
Gh_A03G1114	AT1G67560	PLAT/LH2 domain-containing lipoxygenase family protein	LOX6	19.4841	9.22771	0.04017	0.0182937	6.33348	2.56375	3.89961	0	0.452867	21.9511	3.50155	4.03343	7.09946	19.5623	14.1768	16.6321	12.9141	4.61067	2.03341	15.3428	15.8638	20.1332	24.1643
Gh_A08G0272	AT3G60860	SEC7-like guanine nucleotide exchange family protein	0	1.43734	2.21049	0.160577	0.647845	0.825062	0.64265	0.864598	0.277911	0.318928	1.0907	0.565778	0.361405	0.272024	3.5252	8.00433	3.85126	6.45217	1.26363	0.292816	5.75214	9.17577	13.9641	17.2559
Gh_A12G0194	AT2G15240	UNC-50 family protein	0	15.1615	14.5891	7.78751	9.11493	12.1186	9.11396	17.9668	12.0174	10.5643	13.3489	16.2903	17.539	10.9727	9.60249	19.3901	11.0784	14.058	7.90648	12.7868	13.702	25.917	21.0728	33.1344
Gh_A12G1847	AT4G19110	Protein kinase superfamily protein	0	50.7499	45.9784	9.80628	61.5654	55.5577	50.4797	34.331	104.926	41.3683	45.9054	31.8366	28.6392	28.6754	41.0243	42.0274	46.041	45.1848	30.2849	20.4118	81.3235	135.964	149.01	150.958
Gh_D02G2038	0	0	#N/A	212.424	485.774	19.7328	19.5015	89.0916	23.9359	31.6195	12.423	74.0223	28.4491	72.596	60.7327	92.8298	1726.19	2223.95	2743.28	1887.89	215.853	124.467	4151.17	9989.2	14702.3	17791.1
Gh_D04G1553	AT1G19360	Nucleotide-diphospho-sugar transferase family protein	0	2.87688	2.58665	0.68813	1.12924	0.970193	1.05662	0.652517	1.11501	1.14883	1.20863	1.01368	1.77749	1.49494	3.22211	2.5675	3.26974	2.82828	1.70074	2.19502	3.60792	2.74952	0.745809	4.93837
Gh_D13G2287	AT2G03120	signal peptide peptidase	ATSPP, SPP	4.72399	3.75789	2.1153	4.77731	2.58574	2.88109	3.77091	1.1378	5.16824	10.4711	5.31639	1.8614	2.17735	1.96121	3.52953	2.87005	5.19766	2.6663	14.7414	5.6176	9.7626	8.80278	15.8066
Gh_A08G0265	AT3G60680	Plant protein of unknown function (DUF641)	0	2.39819	1.23916	0.607129	1.01337	1.09689	1.17646	1.31721	0.527775	1.32492	3.89753	2.59461	1.28077	1.70551	2.5002	2.05069	1.82247	2.99615	2.38813	9.49221	2.29897	3.53582	8.11606	23.4706
Gh_A11G1058	AT1G02970	WEE1 kinase homolog	WEE1, ATWEE1	5.51379	4.03545	0.591345	0.090502	0.30851	0.028575	0	0.139142	0.169997	0.208998	7.22119	3.29685	1.43238	1.47958	1.84837	3.8652	7.341	1.56237	1.95982	0.462145	2.0945	8.75635	10.9459
Gh_A12G0331	AT2G16980	Major facilitator superfamily protein	0	0.321111	0.240766	0.567518	0.172173	4.03314	3.15222	0.530577	0.4113	0.224629	1.24924	1.17279	0.599235	0.60662	1.61463	1.58028	3.31827	5.36473	0.829504	1.94505	2.2049	3.69864	4.21452	28.2175
Gh_A12G0332	AT4G38500	Protein of unknown function (DUF616)	0	6.35758	7.33003	4.59256	6.53241	3.71085	3.8118	2.94046	6.24897	4.77827	6.16256	5.06118	4.59796	2.17479	2.98388	4.69424	5.89938	8.57381	3.17619	6.48217	3.01509	5.30433	10.2569	11.2704
Gh_D02G2026	AT2G14820	Phototropic-responsive NPH3 family protein	NPY2	1.06962	2.23221	0.0828777	0.255775	0.152017	0.352857	0.495657	0.225954	1.18351	0.305701	1.73181	0.462617	0.06451	0.34249	0.396614	3.17517	0.813596	0.332199	0.130458	1.05287	1.07124	4.4672	11.077
Gh_D02G2057	AT3G19460	Reticulon family protein	0	1.1385	1.46572	0.029415	5.79627	0.780577	6.46751	2.94757	4.13975	8.91373	0.383087	0.216625	0.164645	0	0.0232395	0.0460707	0.076118	0.462614	3.30478	0.857894	0.05815	0.059061	10.6348	12.5749
Gh_D06G0142	AT4G33330	plant glycogenin-like starch initiation protein 3	PGSIP3, GUX2	9.85062	1.6837	0.0412507	0.0339783	0	0.0138207	0.023752	0.112628	0.100268	0.022942	0.094493	0.0642997	0.107598	0.0602895	2.17933	9.80748	4.60727	1.18472	4.71375	0.234429	38.2283	206.5	234.818
Gh_D10G0048	AT4G20380	LSD1 zinc finger family protein	LSD1	26.2931	28.5907	12.693	56.9614	19.6556	24.1829	39.8185	52.0927	47.3602	42.6841	23.3141	7.42107	13.921	17.4896	28.628	19.2952	40.3455	5.74827	61.776	15.7828	45.5108	48.3018	75.1121
Gh_D10G2027	AT5G06390	FASCICLIN-like arabinogalactan protein 17 precursor	FLA17	25.0897	37.3211	9.41702	5.92771	18.2393	3.30568	6.31292	4.68138	13.1606	13.4447	5.19606	5.2233	4.22676	51.9949	35.9222	104.834	141.855	37.2663	21.6982	9.60201	19.6759	588.204	905.159
Gh_D13G2307	AT5G60490	FASCICLIN-like arabinogalactan-protein 12	FLA12	96.0709	286.066	1.66756	11.9996	25.0358	4.64331	8.55077	8.08576	66.5867	4.68311	0.737248	0	0.15329	0	0.204827	12.8887	74.052	27.8047	38.6261	0.685296	8.17034	1534.28	2146.94
Gh_A07G2063	AT1G02680	TBP-associated factor 13	TAF13	2.00404	1.19709	0.570031	1.50378	1.65582	1.30258	0.0280517	0.819416	1.95886	2.04497	4.37218	6.9752	1.19812	6.20255	8.16393	2.23062	5.65938	0.495658	7.66236	1.94575	3.28821	4.57373	8.33178
Gh_A08G0287	AT4G33565	RING/U-box superfamily protein	0	1.16967	2.00924	3.73174	1.43903	2.89244	5.44654	4.37422	3.0776	3.09591	2.63146	5.09937	0.445567	4.17092	1.7088	1.16179	4.41143	5.73135	3.17595	11.208	0.291733	1.44375	3.89777	15.2209
Gh_A09G1664	AT4G10810	0	0	1.92221	2.32152	0.926828	1.0211	0.140019	0.332861	0.605679	2.25357	0.831998	0	0	0	0.386877	0.09749	0.261392	0.30207	1.35314	0.59669	2.49334	2.91852	4.8444	4.77166	5.4018
Gh_A10G2138	AT3G56110	prenylated RAB acceptor 1.B1	PRA1.B1	14.3886	11.8254	4.76585	0.71892	8.96126	7.82405	8.18922	1.26848	2.5342	16.171	3.55297	2.23467	3.15266	3.4176	5.63344	12.3816	9.73709	9.37329	4.86587	4.47428	14.0483	12.1673	32.5537
Gh_A11G1542	AT1G66680	S-adenosyl-L-methionine-dependent methyltransferases superfamily protein	AR401	28.5569	29.9665	20.9848	29.0645	27.1027	23.4701	23.2574	33.2821	24.1748	30.4922	20.5852	11.9342	9.79663	20.7494	26.6897	25.2358	19.0635	19.117	13.3237	17.478	24.5365	45.4388	61.2381
Gh_A12G0095	AT1G76670	Nucleotide-sugar transporter family protein	0	1.83044	1.43764	0.0448897	1.09517	0.125701	0.117907	0.0449707	2.67536	1.16374	0.144674	0.192576	0.0374983	0.159502	1.43511	1.84403	0.501447	0.970358	0.211094	0	1.6073	1.2816	1.68823	3.43679
Gh_A12G1873	AT1G32170	xyloglucan endotransglucosylase/hydrolase 30	XTR4, XTH30	2.77983	1.77528	0.384919	1.17121	3.49216	3.13569	2.96018	1.18571	3.70721	1.11472	0.0257195	0.017525	0.431406	0.048734	0.113288	0.327062	0.141637	0.0904407	1.51829	0.339746	0.306558	0.575312	4.21865
Gh_D01G0668	AT2G05790	O-Glycosyl hydrolases family 17 protein	0	46.7346	36.5223	2.66251	2.26816	5.93771	4.10831	15.099	1.92455	1.34945	2.93936	0.105136	1.75524	0.773133	0.455267	0.175365	4.94841	52.1241	0.168646	0.803406	0.007169	1.20263	16.8328	94.9476
Gh_D03G0198	AT3G50620	P-loop containing nucleoside triphosphate hydrolases superfamily protein	0	3.95104	2.94953	2.45887	1.52596	2.77661	0.643564	4.50162	1.15303	0.463647	3.77536	5.48878	5.02883	2.51315	1.81024	1.40295	1.11445	2.22457	2.32437	10.1259	0.310945	2.1922	4.6789	12.6779
Gh_D04G1228	AT5G01090	Concanavalin A-like lectin family protein	0	9.19312	8.62424	19.6378	4.30358	5.62265	7.32057	14.6956	2.31592	3.46301	8.8323	29.5773	15.2665	14.8294	17.618	18.5159	15.668	18.6425	14.0665	26.3835	9.98727	19.5155	25.6504	30.7587
Gh_D04G1610	AT1G71220	UDP-glucose:glycoprotein glucosyltransferases;transferases, transferring hexosyl groups;transferases, transferring glycosyl groups	EBS1, UGGT, PSL2	11.7962	9.88879	3.08303	3.49212	9.61855	11.1927	7.81645	3.16966	3.93593	7.96468	5.62418	3.86998	2.62668	5.70201	9.5722	9.53753	5.91054	9.31732	1.94242	4.60017	4.73829	4.87935	12.2357
Gh_D04G1764	AT1G57680	0	0	23.819	17.4876	4.82476	10.7753	15.2637	11.5644	12.2811	11.7097	10.969	13.5616	22.1767	16.7385	16.2428	13.0373	14.2958	28.6724	22.8556	26.2249	15.8962	11.7104	26.8953	25.9644	39.0615
Gh_D05G0779	AT2G27180	0	0	2.29818	3.37058	1.12479	1.20927	1.6848	1.0894	1.75155	0.63217	2.72957	0	0.0672025	0.318981	0.090336	0.115881	0.147671	1.16939	0.917012	0.192466	0	0.04726	0.831588	2.48446	7.10091
Gh_D05G2123	AT2G33740	Nitrogen regulatory PII-like, alpha/beta	CUTA	0.868468	0.438752	0.428073	0.141545	0.616896	0.114302	0.370711	0.0527957	0.104246	1.49901	0.708201	1.34555	0.932498	0.0314915	0.189828	0.0580037	0.130349	0	0.228977	0.047331	0.240718	0.216452	3.41529
Gh_D05G2139	AT4G40080	ENTH/ANTH/VHS superfamily protein	0	0.73495	0.374915	0.174162	0.00367733	0.38206	0.208749	3.58978	0.012586	0.0441563	0.779027	0	0.036995	0.122252	0	0	0.113856	0	0.0168227	0	0	0.01893	0.739202	11.3804
Gh_D05G3304	AT1G29140	Pollen Ole e 1 allergen and extensin family protein	0	0	0	0	0	0	0	0	23.8342	1.3623	1.43983	1.4783	0	0	0	0.109437	0	0	0.0962563	8.93266	0	0.0671997	0	42.9629
Gh_D06G0629	AT5G19570	0	0	1.75143	5.58846	5.65126	1.24113	8.50149	2.18896	5.46846	5.57685	3.95493	16.2946	6.25795	3.44298	6.73004	13.1132	14.0669	7.37421	5.64288	2.87997	5.36765	7.70433	8.73627	3.45124	16.5752
Gh_D06G2012	AT1G80400	RING/U-box superfamily protein	0	13.7209	15.3447	4.95994	6.81958	6.32208	6.7175	8.78504	7.84488	8.05688	7.45234	14.0191	8.37495	10.3362	10.6075	11.3235	14.5498	15.6953	7.26749	6.06784	9.42255	14.9544	24.5561	27.3072
Gh_D08G0608	AT5G47030	ATPase, F1 complex, delta/epsilon subunit	0	3.78639	2.06543	1.26488	0.285062	1.63049	1.87713	0.427066	1.26411	4.08	12.1118	15.5171	12.4979	10.6835	5.70217	6.02275	12.5324	7.75208	5.60539	20.0464	3.71464	4.82624	1.80674	23.0929
Gh_D08G2209	AT3G05580	Calcineurin-like metallo-phosphoesterase superfamily protein	0	15.388	14.4635	3.36485	14.1685	10.164	15.4479	9.87513	14.0296	11.7118	10.3778	12.3296	16.4937	19.213	28.6207	25.3668	12.7351	17.2541	5.22039	11.4834	17.711	25.5505	20.9235	30.719
Gh_D10G0023	AT1G11880	transferases, transferring hexosyl groups	0	2.74744	2.80601	0.560065	2.69833	1.76626	2.00855	2.45428	1.93481	2.61207	3.83944	7.80131	7.17927	6.24853	3.1526	2.33132	1.61428	1.21233	2.95347	0.475157	0.83898	0.852442	0.948064	11.8443
Gh_D12G0575	AT5G66310	ATP binding microtubule motor family protein	0	0.336272	1.15934	1.03551	0.317345	0.403436	2.10133	0.364571	0.053945	0.0435107	1.01392	0.009383	0.188482	0.453733	1.05133	0.56289	0.677741	0.360885	1.00497	1.49351	1.27467	1.76726	2.7844	15.496
Gh_D13G0303	AT1G75540	salt tolerance homolog2	STH2	0.0575333	0.551718	2.25215	0.139169	0.0334177	0	0.084823	4.26195	0.026872	0	1.49654	0.382812	0.427348	1.74641	1.64623	0.491581	0.314973	0.37307	0	1.20836	5.00408	9.19964	12.7376
Gh_D13G1860	AT5G27490	Integral membrane Yip1 family protein	0	11.6955	15.0613	6.50099	10.7333	20.1852	9.26889	23.4378	8.31207	11.2558	33.7125	12.1314	3.16368	5.66478	4.9514	11.29	23.8747	27.7451	12.0273	9.47465	16.3616	21.3382	31.0085	34.2381
