# Supplementary material for: Genome-wide association reveals genetic variation of lint yield components under salty field conditions in cotton (Gossypium hirsutum L.)
Source: BMC Plant Biol. 2020 Jan 14;20:23. doi: 10.1186/s12870-019-2187-y (PMC6961271; doi:10.1186/s12870-019-2187-y)
Supplement: Supplementary file 16 — Additional file 16 Table S9. Candidate genes related to lint percentage identified in stable QTLs. (XLSX 11 kb) [file 12870_2019_2187_MOESM16_ESM.xlsx]

## Sheet: Table S9
Table S9 Candidate genes related to lint percentage identified in stable QTLs.
	QTL	Gene	Arabidopsis ID	ArabDesc	symbol
Common QTLs in different salt conditions	TM11604_TM11618_TM11619_TM11620_TM11628_TM11629_TM11631	Gh_A05G2488	AT1G76520	Auxin efflux carrier family protein	-
	TM14167	Gh_A06G0696	AT2G05840	2-S proteasome subunit PAA2	PAA2
	TM14167	Gh_A06G0693	AT5G20650	copper transporter 5	COPT5
	TM36876_TM36880_TM36885	Gh_A10G2138	AT3G56110	prenylated RAB acceptor 1.B1	PRA1.B1
	TM37264	Gh_A11G0814	AT4G13650	Pentatricopeptide repeat (PPR) superfamily protein	-
	TM55206_TM55216_TM55217_TM55218_TM55223	Gh_D03G1420	AT5G52650	RNA binding Plectin/S1- domain-containing protein	-
	TM55206_TM55216_TM55217_TM55218_TM55223	Gh_D03G1419	AT1G63910	myb domain protein 1-3	AtMYB1-3, MYB1-3
	TM55206_TM55216_TM55217_TM55218_TM55223	Gh_D03G1407	AT5G56350	Pyruvate kinase family protein	-
	TM80201_TM80220_TM80222	Gh_D13G0342	AT3G18820	RAB GTPase homolog G3F	ATRABG3F, ATRAB7B, RAB71, RABG3F, RAB7B
	TM80201_TM80220_TM80222	Gh_D13G0338	AT4G34490	cyclase associated protein 1	ATCAP1, CAP 1, CAP1
Overlapped QTLs with reported GWAS loci	TM40012_TM40030_TM40043_TM40050_TM40054_TM40069	Gh_A12G0098	AT4G35420	dihydroflavonol 4-reductase-like1	DRL1
	TM40012_TM40030_TM40043_TM40050_TM40054_TM40069	Gh_A12G0043	AT4G02980	endoplasmic reticulum auxin binding protein 1	ABP1, ABP
	TM40012_TM40030_TM40043_TM40050_TM40054_TM40069	Gh_A12G0042	AT1G03350	BSD domain-containing protein	-
	TM40012_TM40030_TM40043_TM40050_TM40054_TM40069	Gh_A12G0095	AT1G76670	Nucleotide-sugar transporter family protein	-
	TM82156_TM82168	Gh_D13G2279	AT5G12190	RNA-binding (RRM/RBD/RNP motifs) family protein	-
	TM82156_TM82168	Gh_D13G2278	AT5G12180	calcium-dependent protein kinase 17	CPK17
	TM82156_TM82168	Gh_D13G2301	AT3G45590	splicing endonuclease 1	ATSEN1, SEN1
	TM82156_TM82168	Gh_D13G2302	AT5G60400	-	-
	TM82156_TM82168	Gh_D13G2287	AT2G03120	signal peptide peptidase	ATSPP, SPP
	TM82156_TM82168	Gh_D13G2307	AT5G60490	FASCICLIN-like arabinogalactan-protein 12	FLA12
